# Supplementary material for: Updated distribution of Zoropsis spinimana (Dufour, 1820; Araneae: Zoropsidae) in Germany and novel insights into its ecology based on a citizen science survey
Source: Frontiers journal article supplement (doi:10.3389/frchs.2024.1383339), 2024-03-15
Supplement: Table_1.XLSX [file Table_1.XLSX]

## Sheet: Tabellenblatt1
state	date	Tk25 grid cell	reporting time	number of individuals	gender	image
BaWü	2022-08-30	6524-02-01	15:10:00	1	female	https://NABU-naturgucker.de/?bild=281027345
BaWü	2022-08-30	6816-02-01	21:06:00	1		https://NABU-naturgucker.de/?bild=-445250828
BaWü	2022-08-30	6518-03-01		1		https://NABU-naturgucker.de/?bild=1658184735
BaWü	2022-08-30	6617-03-01	07:00:00	1		https://NABU-naturgucker.de/?bild=-308818221
BaWü	2022-08-30	6817-03-01	17:00:00	1		https://NABU-naturgucker.de/?bild=860087511
BaWü	2022-08-30	6920-02-01	15:48:00	3	male	https://NABU-naturgucker.de/?bild=-1448431037
BaWü	2022-08-30	6617-02-01		3	male	https://NABU-naturgucker.de/?bild=-2016846601
BaWü	2022-08-30	7421-03-01	23:05:00	1	male	https://NABU-naturgucker.de/?bild=-1902565895
BaWü	2022-08-30	7020-04-01	17:08:00	1	female	https://NABU-naturgucker.de/?bild=997103601
NiHB	2022-08-30	2918-02-01	18:34:00	1		https://NABU-naturgucker.de/?bild=362650332
BB	2022-08-30	3546-04-01	08:24:00	1	male	https://NABU-naturgucker.de/?bild=-63646323
NRW	2022-08-30	4010-03-01		1	female	https://NABU-naturgucker.de/?bild=-314723932
NRW	2022-08-30	4105-04-01		2		https://NABU-naturgucker.de/?bild=-1974560108
NRW	2022-08-30	4209-03-01		2	male	https://NABU-naturgucker.de/?bild=-51568452
SAh	2022-08-30	4232-03-01		1	female	https://NABU-naturgucker.de/?bild=1750276967
NRW	2022-08-30	4409-04-01		1		https://NABU-naturgucker.de/?bild=1401914144
NRW	2022-08-30	4503-04-01	13:49:00	1	male	https://NABU-naturgucker.de/?bild=-1829682028
NRW	2022-08-30	4703-03-01	22:56:00	2		https://NABU-naturgucker.de/?bild=-639162077
NRW	2022-08-30	4706-01-01		2	female	https://NABU-naturgucker.de/?bild=980015475
NRW	2022-08-30	4706-04-01	17:03:00	1		https://NABU-naturgucker.de/?bild=1552797877
NRW	2022-08-30	4706-04-01	15:00:00	1	female	https://NABU-naturgucker.de/?bild=-722512386
NRW	2022-08-30	4805-01-01		1	male	https://NABU-naturgucker.de/?bild=-2043906842
NRW	2022-08-30	4805-01-01		1		https://NABU-naturgucker.de/?bild=306324043
NRW	2022-08-30	4807-02-01		1		https://NABU-naturgucker.de/?bild=-2142888785
NRW	2022-08-30	4905-03-01		1	female	https://NABU-naturgucker.de/?bild=1578915365
NRW	2022-08-30	5005-01-01		1	male	https://NABU-naturgucker.de/?bild=368003917
NRW	2022-08-30	5006-04-01		2	female	https://NABU-naturgucker.de/?bild=691793665
NRW	2022-08-30	5006-04-01		1	female	https://NABU-naturgucker.de/?bild=1637576911
NRW	2022-08-30	5007-01-01	18:13:00	1		https://NABU-naturgucker.de/?bild=1360421429
NRW	2022-08-30	5007-03-01		2	male	https://NABU-naturgucker.de/?bild=139651566
NRW	2022-08-30	5008-03-01		2	female	https://NABU-naturgucker.de/?bild=-1032816693
NRW	2022-08-30	5008-04-01		1	male	https://NABU-naturgucker.de/?bild=1535430693
NRW	2022-08-30	5109-02-01		1	female	https://NABU-naturgucker.de/?bild=-1941142163
NRW	2022-08-30	5109-04-01		1		https://NABU-naturgucker.de/?bild=-1932608322
NRW	2022-08-30	5109-04-01		3	female	https://NABU-naturgucker.de/?bild=-1943883238
NRW	2022-08-30	5208-01-01		1		https://NABU-naturgucker.de/?bild=-1798807220
NRW	2022-08-30	5208-01-01		1	female	https://NABU-naturgucker.de/?bild=1739620106
NRW	2022-08-30	5308-03-01		1		https://NABU-naturgucker.de/?bild=-1556114247
Bay	2022-08-30	5630-02-01		1		https://NABU-naturgucker.de/?bild=-1322436916
Hes	2022-08-30	5817-01-01		2	female	https://NABU-naturgucker.de/?bild=-764075167
Hes	2022-08-30	5818-03-01		2		https://NABU-naturgucker.de/?bild=-1610352391
Hes	2022-08-30	5818-04-01	21:06:00	1		https://NABU-naturgucker.de/?bild=500746321
Hes	2022-08-30	5915-01-01		1	male	https://NABU-naturgucker.de/?bild=-311623573
Rh-Pf	2022-08-30	5915-03-01		1	male	https://NABU-naturgucker.de/?bild=923842311
Hes	2022-08-30	5916-01-01		1	female	https://NABU-naturgucker.de/?bild=-182287066
Hes	2022-08-30	5918-02-01	22:22:00	1	male	https://NABU-naturgucker.de/?bild=-1478096185
Bay	2022-08-30	5927-01-01		3	female	https://NABU-naturgucker.de/?bild=594181573
Rh-Pf	2022-08-30	6014-02-01		1		https://NABU-naturgucker.de/?bild=-1234929129
Rh-Pf	2022-08-30	6014-04-01		1	female	https://NABU-naturgucker.de/?bild=381734840
Rh-Pf	2022-08-30	6015-01-01		1		https://NABU-naturgucker.de/?bild=-1180699850
Rh-Pf	2022-08-30	6015-01-01		1	female	https://NABU-naturgucker.de/?bild=-281148154
Rh-Pf	2022-08-30	6015-01-01	11:06:00	1		https://NABU-naturgucker.de/?bild=288880824
Rh-Pf	2022-08-30	6015-01-01		1	female	https://NABU-naturgucker.de/?bild=-292340969
Rh-Pf	2022-08-30	6015-02-01		1	female	https://NABU-naturgucker.de/?bild=-405099578
Rh-Pf	2022-08-30	6015-02-01			female	https://NABU-naturgucker.de/?bild=1188744398
Rh-Pf	2022-08-30	6015-02-01			female	https://NABU-naturgucker.de/?bild=646636978
Rh-Pf	2022-08-30	6015-02-01		1	female	https://NABU-naturgucker.de/?bild=-2122275799
Rh-Pf	2022-08-30	6015-04-01		1	female	https://NABU-naturgucker.de/?bild=685472354
Hes	2022-08-30	6016-01-01		1	male	https://NABU-naturgucker.de/?bild=1643117927
Hes	2022-08-30	6016-02-01		1	female	https://NABU-naturgucker.de/?bild=-276947136
Bay	2022-08-30	6020-01-01		1		https://NABU-naturgucker.de/?bild=-2083648900
Hes	2022-08-30	6116-04-01		1	male	https://NABU-naturgucker.de/?bild=-1120108859
Hes	2022-08-30	6117-01-01		1	male	https://NABU-naturgucker.de/?bild=-402770439
Hes	2022-08-30	6117-01-01		1	male	https://NABU-naturgucker.de/?bild=1479278988
Hes	2022-08-30	6117-02-01		1	female	https://NABU-naturgucker.de/?bild=-1603382629
Hes	2022-08-30	6117-02-01		1	female	https://NABU-naturgucker.de/?bild=995161737
Hes	2022-08-30	6117-02-01		1		https://NABU-naturgucker.de/?bild=-176828207
Hes	2022-08-30	6117-02-01		5	male	https://NABU-naturgucker.de/?bild=-904565836
Hes	2022-08-30	6117-02-01		1	female	https://NABU-naturgucker.de/?bild=-144814228
Hes	2022-08-30	6117-04-01	09:07:00	1	male	https://NABU-naturgucker.de/?bild=1243137388
Hes	2022-08-30	6217-02-01		1		https://NABU-naturgucker.de/?bild=1611694150
Hes	2022-08-30	6316-04-01		1	male	https://NABU-naturgucker.de/?bild=-896050273
Hes	2022-08-30	6318-03-01	22:00:00	1		https://NABU-naturgucker.de/?bild=-1850255564
Rh-Pf	2022-08-30	6414-02-01	13:21:00	1	male	https://NABU-naturgucker.de/?bild=1234055978
Hes	2022-08-30	6416-02-01		1	female	https://NABU-naturgucker.de/?bild=-734721076
BaWü	2022-08-30	6416-04-01		1	female	https://NABU-naturgucker.de/?bild=-1307332522
BaWü	2022-08-30	6416-04-01		1		https://NABU-naturgucker.de/?bild=1650656001
BaWü	2022-08-30	6416-04-01		1	female	https://NABU-naturgucker.de/?bild=520356467
BaWü	2022-08-30	6417-02-01		1	male	https://NABU-naturgucker.de/?bild=-1889803196
BaWü	2022-08-30	6417-02-01		1	male	https://NABU-naturgucker.de/?bild=-1875107895
BaWü	2022-08-30	6417-02-01		1	male	https://NABU-naturgucker.de/?bild=1411833597
BaWü	2022-08-30	6417-02-01		1		https://NABU-naturgucker.de/?bild=-442589292
Hes	2022-08-30	6417-03-01	10:00:00	1	male	https://NABU-naturgucker.de/?bild=1464522999
Hes	2022-08-30	6417-03-01		1		https://NABU-naturgucker.de/?bild=-1938112146
Hes	2022-08-30	6417-04-01		1	male	https://NABU-naturgucker.de/?bild=-1295078349
Hes	2022-08-30	6417-04-01		1	male	https://NABU-naturgucker.de/?bild=484471490
Hes	2022-08-30	6417-04-01		1		https://NABU-naturgucker.de/?bild=956356903
Hes	2022-08-30	6417-04-01		1		https://NABU-naturgucker.de/?bild=1643768687
Hes	2022-08-30	6417-04-01		1	male	https://NABU-naturgucker.de/?bild=-1002432733
Hes	2022-08-30	6417-04-01	14:23:00	5	male	https://NABU-naturgucker.de/?bild=-315549873
Hes	2022-08-30	6417-04-01	23:00:00	1	female	https://NABU-naturgucker.de/?bild=-1249643384
Rh-Pf	2022-08-30	6512-04-01		1	male	https://NABU-naturgucker.de/?bild=-590449479
BaWü	2022-08-30	6516-02-01		1		https://NABU-naturgucker.de/?bild=-408571011
BaWü	2022-08-30	6516-02-01		1	male	https://NABU-naturgucker.de/?bild=-1407405700
BaWü	2022-08-30	6516-02-01		1	male	https://NABU-naturgucker.de/?bild=694077438
BaWü	2022-08-30	6516-02-01		1	female	https://NABU-naturgucker.de/?bild=1511216502
BaWü	2022-08-30	6516-02-01		1		https://NABU-naturgucker.de/?bild=626100032
BaWü	2022-08-30	6516-02-01	01:26:00	1		https://NABU-naturgucker.de/?bild=816232001
BaWü	2022-08-30	6516-02-01		4	female	https://NABU-naturgucker.de/?bild=1753401537
Rh-Pf	2022-08-30	6516-03-01		1		https://NABU-naturgucker.de/?bild=-938329694
BaWü	2022-08-30	6517-01-01		1	male	https://NABU-naturgucker.de/?bild=-1571482899
BaWü	2022-08-30	6517-01-01	11:15:00	1		https://NABU-naturgucker.de/?bild=227997088
BaWü	2022-08-30	6517-02-01		1	male	https://NABU-naturgucker.de/?bild=-2142450409
BaWü	2022-08-30	6517-02-01		1	male	https://NABU-naturgucker.de/?bild=441384065
BaWü	2022-08-30	6517-02-01		1	male	https://NABU-naturgucker.de/?bild=1748355700
BaWü	2022-08-30	6517-03-01		1	male	https://NABU-naturgucker.de/?bild=-1943332722
BaWü	2022-08-30	6517-03-01		1	male	https://NABU-naturgucker.de/?bild=850481696
BaWü	2022-08-30	6517-03-01		1		https://NABU-naturgucker.de/?bild=-1468099882
BaWü	2022-08-30	6517-03-01		1	male	https://NABU-naturgucker.de/?bild=-524623902
BaWü	2022-08-30	6517-04-01		2		https://NABU-naturgucker.de/?bild=1477121432
BaWü	2022-08-30	6518-03-01		1		https://NABU-naturgucker.de/?bild=243505900
BaWü	2022-08-30	6518-03-01		1		https://NABU-naturgucker.de/?bild=384117539
BaWü	2022-08-30	6617-01-01		1	male	https://NABU-naturgucker.de/?bild=-194143203
BaWü	2022-08-30	6617-01-01		1	male	https://NABU-naturgucker.de/?bild=777549674
BaWü	2022-08-30	6617-02-01		1	male	https://NABU-naturgucker.de/?bild=-525962499
BaWü	2022-08-30	6617-02-01	18:30:00	1	male	https://NABU-naturgucker.de/?bild=363638596
BaWü	2022-08-30	6617-03-01		1	male	https://NABU-naturgucker.de/?bild=607339423
BaWü	2022-08-30	6617-04-01		1	male	https://NABU-naturgucker.de/?bild=-2045435773
BaWü	2022-08-30	6617-04-01		1	female	https://NABU-naturgucker.de/?bild=-2017921028
BaWü	2022-08-30	6617-04-01		1		https://NABU-naturgucker.de/?bild=-1516325315
BaWü	2022-08-30	6618-01-01	23:57:00	1	female	https://NABU-naturgucker.de/?bild=1746445052
BaWü	2022-08-30	6618-01-01		1	male	https://NABU-naturgucker.de/?bild=-648854997
BaWü	2022-08-30	6618-03-01		3	male	https://NABU-naturgucker.de/?bild=1959277677
BaWü	2022-08-30	6618-03-01		1	female	https://NABU-naturgucker.de/?bild=-1056449044
BaWü	2022-08-30	6618-04-01		3	male	https://NABU-naturgucker.de/?bild=-1585179627
BaWü	2022-08-30	6618-04-01		1		https://NABU-naturgucker.de/?bild=-515040649
BaWü	2022-08-30	6618-04-01	23:00:00	1	female	https://NABU-naturgucker.de/?bild=-243666706
BaWü	2022-08-30	6618-04-01		1	female	https://NABU-naturgucker.de/?bild=1911163221
BaWü	2022-08-30	6619-01-01		1		https://NABU-naturgucker.de/?bild=1766695569
BaWü	2022-08-30	6620-04-01		2	female	https://NABU-naturgucker.de/?bild=349042872
Rh-Pf	2022-08-30	6714-02-01		2		https://NABU-naturgucker.de/?bild=484712762
BaWü	2022-08-30	6716-02-01	17:50:00	1	female	https://NABU-naturgucker.de/?bild=1675084019
BaWü	2022-08-30	6717-01-01		1	female	https://NABU-naturgucker.de/?bild=1960175444
BaWü	2022-08-30	6717-02-01		1		https://NABU-naturgucker.de/?bild=131585309
BaWü	2022-08-30	6717-02-01			female	https://NABU-naturgucker.de/?bild=546622251
BaWü	2022-08-30	6717-03-01	15:30:00	1	female	https://NABU-naturgucker.de/?bild=-1558904672
BaWü	2022-08-30	6717-03-01		2	female	https://NABU-naturgucker.de/?bild=-86557877
BaWü	2022-08-30	6717-04-01		1		https://NABU-naturgucker.de/?bild=-2143679367
BaWü	2022-08-30	6718-01-01		1	female	https://NABU-naturgucker.de/?bild=-2114695929
BaWü	2022-08-30	6718-02-01	22:00:00	1	female	https://NABU-naturgucker.de/?bild=-306836323
BaWü	2022-08-30	6816-02-01		1	female	https://NABU-naturgucker.de/?bild=-592634034
BaWü	2022-08-30	6816-04-01	21:37:00	1		https://NABU-naturgucker.de/?bild=971333166
BaWü	2022-08-30	6817-02-01		5	female	https://NABU-naturgucker.de/?bild=541209913
BaWü	2022-08-30	6817-03-01		1		https://NABU-naturgucker.de/?bild=-1049985750
BaWü	2022-08-30	6817-04-01	09:32:00	1	male	https://NABU-naturgucker.de/?bild=-2125794989
BaWü	2022-08-30	6820-04-01	07:00:00	1		https://NABU-naturgucker.de/?bild=-1488953259
BaWü	2022-08-30	6821-03-01		4		https://NABU-naturgucker.de/?bild=-2081718751
BaWü	2022-08-30	6821-03-01		1	female	https://NABU-naturgucker.de/?bild=-953916829
BaWü	2022-08-30	6821-03-01		1	female	https://NABU-naturgucker.de/?bild=1687318390
BaWü	2022-08-30	6821-03-01		1	male	https://NABU-naturgucker.de/?bild=-343693993
BaWü	2022-08-30	6821-03-01		2		https://NABU-naturgucker.de/?bild=2130987823
BaWü	2022-08-30	6821-04-01		1		https://NABU-naturgucker.de/?bild=-2017175245
BaWü	2022-08-30	6821-04-01		1	female	https://NABU-naturgucker.de/?bild=-840249262
BaWü	2022-08-30	6821-04-01		1		https://NABU-naturgucker.de/?bild=-805307661
BaWü	2022-08-30	6821-04-01		1		https://NABU-naturgucker.de/?bild=-949433711
Rh-Pf	2022-08-30	6915-04-01	21:30:00	1	female	https://NABU-naturgucker.de/?bild=-2119716081
Rh-Pf	2022-08-30	6915-04-01		1		https://NABU-naturgucker.de/?bild=569619050
Rh-Pf	2022-08-30	6915-04-01		1		https://NABU-naturgucker.de/?bild=-841875928
Rh-Pf	2022-08-30	6915-04-01		1	male	https://NABU-naturgucker.de/?bild=2051296823
BaWü	2022-08-30	6916-01-01		4		https://NABU-naturgucker.de/?bild=-1634882388
BaWü	2022-08-30	6916-01-01	01:40:00	1	female	https://NABU-naturgucker.de/?bild=-925641937
BaWü	2022-08-30	6916-01-01	21:00:00	1	female	https://NABU-naturgucker.de/?bild=-404159945
BaWü	2022-08-30	6916-02-01		1	female	https://NABU-naturgucker.de/?bild=-1699556930
BaWü	2022-08-30	6916-02-01		1		https://NABU-naturgucker.de/?bild=1773819543
BaWü	2022-08-30	6916-03-01		1	male	https://NABU-naturgucker.de/?bild=254388921
BaWü	2022-08-30	6916-03-01		1		https://NABU-naturgucker.de/?bild=-1145724724
BaWü	2022-08-30	6916-03-01		1	male	https://NABU-naturgucker.de/?bild=1910299131
BaWü	2022-08-30	6916-03-01		1		https://NABU-naturgucker.de/?bild=1110783922
BaWü	2022-08-30	6916-03-01		1		https://NABU-naturgucker.de/?bild=-931446570
BaWü	2022-08-30	6916-03-01		1		https://NABU-naturgucker.de/?bild=-1768553444
BaWü	2022-08-30	6916-03-01	11:38:00	1		https://NABU-naturgucker.de/?bild=1013411681
BaWü	2022-08-30	6916-04-01		1	male	https://NABU-naturgucker.de/?bild=664419951
BaWü	2022-08-30	6916-04-01		1		https://NABU-naturgucker.de/?bild=1948676704
BaWü	2022-08-30	6917-01-01		4		https://NABU-naturgucker.de/?bild=-801884237
BaWü	2022-08-30	6917-01-01		1	male	https://NABU-naturgucker.de/?bild=817066663
BaWü	2022-08-30	6917-02-01		1	female	https://NABU-naturgucker.de/?bild=1291049485
BaWü	2022-08-30	6917-03-01	06:00:00	1	female	https://NABU-naturgucker.de/?bild=-1285144128
BaWü	2022-08-30	6922-02-01		4	male	https://NABU-naturgucker.de/?bild=-802212146
BaWü	2022-08-30	7015-02-01		1		https://NABU-naturgucker.de/?bild=-1242361099
BaWü	2022-08-30	7015-02-01		1		https://NABU-naturgucker.de/?bild=1131258231
BaWü	2022-08-30	7015-02-01		1		https://NABU-naturgucker.de/?bild=985918775
BaWü	2022-08-30	7015-02-01	19:00:00	1	male	https://NABU-naturgucker.de/?bild=249580569
BaWü	2022-08-30	7015-02-01		1		https://NABU-naturgucker.de/?bild=27092825
BaWü	2022-08-30	7015-03-01	22:32:00	1		https://NABU-naturgucker.de/?bild=-873948140
BaWü	2022-08-30	7015-04-01		2		https://NABU-naturgucker.de/?bild=-1827667739
BaWü	2022-08-30	7015-04-01		1		https://NABU-naturgucker.de/?bild=-1137078986
BaWü	2022-08-30	7015-04-01		1	male	https://NABU-naturgucker.de/?bild=483282692
BaWü	2022-08-30	7015-04-01		1	male	https://NABU-naturgucker.de/?bild=1256190317
BaWü	2022-08-30	7015-04-01		1	male	https://NABU-naturgucker.de/?bild=-1494836638
BaWü	2022-08-30	7016-01-01		1	male	https://NABU-naturgucker.de/?bild=-1719427893
BaWü	2022-08-30	7016-01-01		1		https://NABU-naturgucker.de/?bild=-234889425
BaWü	2022-08-30	7016-01-01		1	female	https://NABU-naturgucker.de/?bild=868623363
BaWü	2022-08-30	7016-01-01		1	male	https://NABU-naturgucker.de/?bild=-589613030
BaWü	2022-08-30	7016-01-01		1		https://NABU-naturgucker.de/?bild=-1003111027
BaWü	2022-08-30	7016-01-01		1	female	https://NABU-naturgucker.de/?bild=1027690078
BaWü	2022-08-30	7016-01-01		1		https://NABU-naturgucker.de/?bild=1448960254
BaWü	2022-08-30	7016-02-01		1		https://NABU-naturgucker.de/?bild=-1864701907
BaWü	2022-08-30	7016-02-01		1		https://NABU-naturgucker.de/?bild=-393800355
BaWü	2022-08-30	7016-02-01		1		https://NABU-naturgucker.de/?bild=-536103964
BaWü	2022-08-30	7016-03-01		2	male	https://NABU-naturgucker.de/?bild=1937901991
BaWü	2022-08-30	7017-01-01	21:14:00	10	male	https://NABU-naturgucker.de/?bild=-456006123
BaWü	2022-08-30	7018-02-01		1	male	https://NABU-naturgucker.de/?bild=1815744602
BaWü	2022-08-30	7019-02-01		16		https://NABU-naturgucker.de/?bild=-1331790484
BaWü	2022-08-30	7020-01-01		1	female	https://NABU-naturgucker.de/?bild=-1062026625
BaWü	2022-08-30	7020-01-01		1	male	https://NABU-naturgucker.de/?bild=960675768
BaWü	2022-08-30	7020-02-01		1	male	https://NABU-naturgucker.de/?bild=-1082497177
BaWü	2022-08-30	7020-04-01		1	male	https://NABU-naturgucker.de/?bild=-1089059623
BaWü	2022-08-30	7021-01-01		1		https://NABU-naturgucker.de/?bild=680178190
BaWü	2022-08-30	7021-01-01		3		https://NABU-naturgucker.de/?bild=227122856
BaWü	2022-08-30	7021-02-01		6		https://NABU-naturgucker.de/?bild=1111497295
BaWü	2022-08-30	7021-03-01		1		https://NABU-naturgucker.de/?bild=-1966614866
BaWü	2022-08-30	7021-03-01		1	female	https://NABU-naturgucker.de/?bild=-15743371
BaWü	2022-08-30	7021-03-01		1	male	https://NABU-naturgucker.de/?bild=19657126
BaWü	2022-08-30	7021-03-01		2	male	https://NABU-naturgucker.de/?bild=-1645538426
BaWü	2022-08-30	7021-04-01		1		https://NABU-naturgucker.de/?bild=-2195611
BaWü	2022-08-30	7115-01-01		1		https://NABU-naturgucker.de/?bild=994751350
BaWü	2022-08-30	7115-01-01		1		https://NABU-naturgucker.de/?bild=-549254321
BaWü	2022-08-30	7115-01-01		1		https://NABU-naturgucker.de/?bild=-267170347
BaWü	2022-08-30	7115-02-01		1	female	https://NABU-naturgucker.de/?bild=-1444599835
BaWü	2022-08-30	7115-03-01		1		https://NABU-naturgucker.de/?bild=-309097292
BaWü	2022-08-30	7115-04-01		3	female	https://NABU-naturgucker.de/?bild=-646303095
BaWü	2022-08-30	7116-02-01		1		https://NABU-naturgucker.de/?bild=-784339774
BaWü	2022-08-30	7116-03-01		1		https://NABU-naturgucker.de/?bild=803120158
BaWü	2022-08-30	7118-01-01		5		https://NABU-naturgucker.de/?bild=594495279
BaWü	2022-08-30	7118-01-01		1	male	https://NABU-naturgucker.de/?bild=2079090947
BaWü	2022-08-30	7118-01-01		1	male	https://NABU-naturgucker.de/?bild=-1147385471
BaWü	2022-08-30	7118-01-01		1	male	https://NABU-naturgucker.de/?bild=743778801
BaWü	2022-08-30	7118-01-01		1	male	https://NABU-naturgucker.de/?bild=-890554957
BaWü	2022-08-30	7118-01-01		1		https://NABU-naturgucker.de/?bild=1731567604
BaWü	2022-08-30	7120-02-01		4	male	https://NABU-naturgucker.de/?bild=-435106208
BaWü	2022-08-30	7120-02-01		1		https://NABU-naturgucker.de/?bild=1162787304
BaWü	2022-08-30	7120-03-01		1	female	https://NABU-naturgucker.de/?bild=-1930423384
BaWü	2022-08-30	7120-03-01		1	male	https://NABU-naturgucker.de/?bild=1708420053
BaWü	2022-08-30	7120-03-01		1		https://NABU-naturgucker.de/?bild=-458636658
BaWü	2022-08-30	7120-03-01		1	female	https://NABU-naturgucker.de/?bild=869204894
BaWü	2022-08-30	7120-03-01		1		https://NABU-naturgucker.de/?bild=1453776117
BaWü	2022-08-30	7120-03-01		1	female	https://NABU-naturgucker.de/?bild=-1656176692
BaWü	2022-08-30	7120-03-01		10		https://NABU-naturgucker.de/?bild=1536007440
BaWü	2022-08-30	7121-01-01		1	male	https://NABU-naturgucker.de/?bild=-2131215492
BaWü	2022-08-30	7121-01-01		1	male	https://NABU-naturgucker.de/?bild=-1360253439
BaWü	2022-08-30	7121-01-01		1	female	https://NABU-naturgucker.de/?bild=-2096169186
BaWü	2022-08-30	7121-01-01		1		https://NABU-naturgucker.de/?bild=1747196573
BaWü	2022-08-30	7121-01-01		1		https://NABU-naturgucker.de/?bild=1983916292
BaWü	2022-08-30	7121-01-01		1	female	https://NABU-naturgucker.de/?bild=1955571951
BaWü	2022-08-30	7121-03-01		1	female	https://NABU-naturgucker.de/?bild=-1696747708
BaWü	2022-08-30	7121-03-01		1	male	https://NABU-naturgucker.de/?bild=1650700431
BaWü	2022-08-30	7121-03-01		1		https://NABU-naturgucker.de/?bild=782121909
BaWü	2022-08-30	7121-03-01		1	male	https://NABU-naturgucker.de/?bild=1184398481
BaWü	2022-08-30	7121-04-01		1	male	https://NABU-naturgucker.de/?bild=-261595428
BaWü	2022-08-30	7121-04-01		2		https://NABU-naturgucker.de/?bild=1256690843
BaWü	2022-08-30	7121-04-01	22:00:00	1	female	https://NABU-naturgucker.de/?bild=-1670060772
BaWü	2022-08-30	7122-01-01	23:18:00	1	female	https://NABU-naturgucker.de/?bild=32122604
BaWü	2022-08-30	7214-04-01		2	male	https://NABU-naturgucker.de/?bild=-271640728
BaWü	2022-08-30	7214-04-01		1		https://NABU-naturgucker.de/?bild=-271640728
BaWü	2022-08-30	7215-01-01	12:55:00	15	female	https://NABU-naturgucker.de/?bild=1257247511
BaWü	2022-08-30	7215-01-01		1		https://NABU-naturgucker.de/?bild=1592823896
BaWü	2022-08-30	7215-01-01	01:00:00	1	male	https://NABU-naturgucker.de/?bild=-1921152099
BaWü	2022-08-30	7215-02-01		1		https://NABU-naturgucker.de/?bild=-2136464788
BaWü	2022-08-30	7215-02-01		1	female	https://NABU-naturgucker.de/?bild=-1359015867
BaWü	2022-08-30	7215-03-01		3	male	https://NABU-naturgucker.de/?bild=-688524024
BaWü	2022-08-30	7215-04-01		1	male	https://NABU-naturgucker.de/?bild=508945958
BaWü	2022-08-30	7216-01-01		1	female	https://NABU-naturgucker.de/?bild=975211002
BaWü	2022-08-30	7216-01-01		1	male	https://NABU-naturgucker.de/?bild=-633915752
BaWü	2022-08-30	7216-01-01		1	male	https://NABU-naturgucker.de/?bild=1396817788
BaWü	2022-08-30	7220-04-01		1		https://NABU-naturgucker.de/?bild=505402969
BaWü	2022-08-30	7221-01-01		1		https://NABU-naturgucker.de/?bild=-1294341210
BaWü	2022-08-30	7221-01-01		1	female	https://NABU-naturgucker.de/?bild=1188841627
BaWü	2022-08-30	7221-01-01		1		https://NABU-naturgucker.de/?bild=-726614170
BaWü	2022-08-30	7221-01-01		1		https://NABU-naturgucker.de/?bild=882235388
BaWü	2022-08-30	7221-01-01	13:44:00	1		https://NABU-naturgucker.de/?bild=1576634040
BaWü	2022-08-30	7221-03-01		1	male	https://NABU-naturgucker.de/?bild=133743620
BaWü	2022-08-30	7222-01-01		1	male	https://NABU-naturgucker.de/?bild=2112429544
BaWü	2022-08-30	7222-03-01		2	male	https://NABU-naturgucker.de/?bild=-283017298
BaWü	2022-08-30	7222-04-01		1	male	https://NABU-naturgucker.de/?bild=-730352158
BaWü	2022-08-30	7313-02-01		1		https://NABU-naturgucker.de/?bild=709921349
BaWü	2022-08-30	7313-02-01		1		https://NABU-naturgucker.de/?bild=1576767305
BaWü	2022-08-30	7314-02-01		1		https://NABU-naturgucker.de/?bild=-1599853872
BaWü	2022-08-30	7314-02-01		1		https://NABU-naturgucker.de/?bild=1485568037
BaWü	2022-08-30	7314-03-01		1	female	https://NABU-naturgucker.de/?bild=-1752854484
BaWü	2022-08-30	7314-03-01		1	male	https://NABU-naturgucker.de/?bild=981526680
BaWü	2022-08-30	7314-03-01		1		https://NABU-naturgucker.de/?bild=-1217242121
BaWü	2022-08-30	7315-01-01	09:00:00	1	male	https://NABU-naturgucker.de/?bild=756488057
BaWü	2022-08-30	7320-01-01		2		https://NABU-naturgucker.de/?bild=1725464478
BaWü	2022-08-30	7512-04-01		1	female	https://NABU-naturgucker.de/?bild=-297100213
BaWü	2022-08-30	7513-01-01		1		https://NABU-naturgucker.de/?bild=745416699
BaWü	2022-08-30	7513-01-01		1	female	https://NABU-naturgucker.de/?bild=1312859494
BaWü	2022-08-30	7513-01-01		1		https://NABU-naturgucker.de/?bild=1786295242
BaWü	2022-08-30	7513-02-01		1		https://NABU-naturgucker.de/?bild=-1553546144
BaWü	2022-08-30	7513-02-01		1	female	https://NABU-naturgucker.de/?bild=-1374147381
BaWü	2022-08-30	7513-02-01		1	male	https://NABU-naturgucker.de/?bild=716143755
BaWü	2022-08-30	7513-02-01		1	female	https://NABU-naturgucker.de/?bild=-1308899796
BaWü	2022-08-30	7513-02-01	07:10:00	1	female	https://NABU-naturgucker.de/?bild=1783614727
BaWü	2022-08-30	7513-02-01		2	male	https://NABU-naturgucker.de/?bild=-545420442
BaWü	2022-08-30	7513-02-01		1	male	https://NABU-naturgucker.de/?bild=-1953882700
BaWü	2022-08-30	7514-03-01		1	female	https://NABU-naturgucker.de/?bild=-1183590110
BaWü	2022-08-30	7612-04-01		1	female	https://NABU-naturgucker.de/?bild=-1449779187
BaWü	2022-08-30	7613-03-01		1	male	https://NABU-naturgucker.de/?bild=-2100075241
BaWü	2022-08-30	7712-04-01		2	male	https://NABU-naturgucker.de/?bild=-1655239443
BaWü	2022-08-30	7714-02-01	21:00:00	1	female	https://NABU-naturgucker.de/?bild=-818556113
BaWü	2022-08-30	7812-02-01		5		https://NABU-naturgucker.de/?bild=-1868707538
BaWü	2022-08-30	7812-02-01		1		https://NABU-naturgucker.de/?bild=1402545460
BaWü	2022-08-30	7812-03-01		1		https://NABU-naturgucker.de/?bild=-251588469
BaWü	2022-08-30	7812-03-01		1		https://NABU-naturgucker.de/?bild=845675598
BaWü	2022-08-30	7813-03-01	16:00:00	1	male	https://NABU-naturgucker.de/?bild=-2128574503
BaWü	2022-08-30	7813-04-01		1	female	https://NABU-naturgucker.de/?bild=-689552134
BaWü	2022-08-30	7912-02-01		1	female	https://NABU-naturgucker.de/?bild=-645488638
BaWü	2022-08-30	7912-02-01		1		https://NABU-naturgucker.de/?bild=-754840005
BaWü	2022-08-30	7912-04-01		4		https://NABU-naturgucker.de/?bild=-1494766263
BaWü	2022-08-30	7913-01-01	21:52:00	1	female	https://NABU-naturgucker.de/?bild=1448258285
BaWü	2022-08-30	7913-01-01		5	male	https://NABU-naturgucker.de/?bild=-1292105067
BaWü	2022-08-30	7913-01-01		1	male	https://NABU-naturgucker.de/?bild=108733079
BaWü	2022-08-30	7913-01-01	19:44:00	1	female	https://NABU-naturgucker.de/?bild=322174395
BaWü	2022-08-30	7913-02-01		2	female	https://NABU-naturgucker.de/?bild=1813975745
BaWü	2022-08-30	7913-02-01		1	female	https://NABU-naturgucker.de/?bild=2049940868
BaWü	2022-08-30	7913-03-01		1	male	https://NABU-naturgucker.de/?bild=-1877951938
BaWü	2022-08-30	7913-03-01		1		https://NABU-naturgucker.de/?bild=588066668
BaWü	2022-08-30	7913-03-01		1	female	https://NABU-naturgucker.de/?bild=1107697265
BaWü	2022-08-30	7913-03-01		1	female	https://NABU-naturgucker.de/?bild=179508786
BaWü	2022-08-30	7913-03-01		1	female	https://NABU-naturgucker.de/?bild=-309792425
BaWü	2022-08-30	7913-03-01		1	male	https://NABU-naturgucker.de/?bild=2001927716
BaWü	2022-08-30	7913-03-01		1		https://NABU-naturgucker.de/?bild=-1128560782
BaWü	2022-08-30	7913-03-01		1	female	https://NABU-naturgucker.de/?bild=-486706943
BaWü	2022-08-30	7913-03-01	22:06:00	1	female	https://NABU-naturgucker.de/?bild=605036682
BaWü	2022-08-30	8012-02-01	23:00:00	2	female	https://NABU-naturgucker.de/?bild=-270527905
BaWü	2022-08-30	8012-02-01		1		https://NABU-naturgucker.de/?bild=1829944846
BaWü	2022-08-30	8012-02-01		1	female	https://NABU-naturgucker.de/?bild=1848984805
BaWü	2022-08-30	8012-02-01		1	female	https://NABU-naturgucker.de/?bild=1837598848
BaWü	2022-08-30	8012-03-01		1	male	https://NABU-naturgucker.de/?bild=324982259
BaWü	2022-08-30	8012-03-01		1		https://NABU-naturgucker.de/?bild=894112678
BaWü	2022-08-30	8012-03-01		1	female	https://NABU-naturgucker.de/?bild=1094558696
BaWü	2022-08-30	8013-01-01		1	female	https://NABU-naturgucker.de/?bild=-1805693109
BaWü	2022-08-30	8013-01-01		1	female	https://NABU-naturgucker.de/?bild=1908051785
BaWü	2022-08-30	8013-01-01		1		https://NABU-naturgucker.de/?bild=-288672158
BaWü	2022-08-30	8013-01-01		1		https://NABU-naturgucker.de/?bild=1208198144
BaWü	2022-08-30	8013-01-01		1		https://NABU-naturgucker.de/?bild=-1422247330
BaWü	2022-08-30	8013-01-01		1	female	https://NABU-naturgucker.de/?bild=1621816365
BaWü	2022-08-30	8013-01-01		1		https://NABU-naturgucker.de/?bild=268986655
BaWü	2022-08-30	8013-01-01		4		https://NABU-naturgucker.de/?bild=21527422
BaWü	2022-08-30	8013-01-01		1	female	https://NABU-naturgucker.de/?bild=1456415835
BaWü	2022-08-30	8013-01-01	22:30:00	1	female	https://NABU-naturgucker.de/?bild=-1765682376
BaWü	2022-08-30	8112-01-01		2	female	https://NABU-naturgucker.de/?bild=-1842040814
BaWü	2022-08-30	8112-01-01		1		https://NABU-naturgucker.de/?bild=-24978485
BaWü	2022-08-30	8119-03-01		1	male	https://NABU-naturgucker.de/?bild=848274088
BaWü	2022-08-30	8211-02-01		10	male	https://NABU-naturgucker.de/?bild=-1959314079
BaWü	2022-08-30	8211-02-01		1		https://NABU-naturgucker.de/?bild=911134954
BaWü	2022-08-30	8311-04-01		1	female	https://NABU-naturgucker.de/?bild=-1948941684
BaWü	2022-08-30	8311-04-01		1	female	https://NABU-naturgucker.de/?bild=1194030388
BaWü	2022-08-30	8311-04-01		1	male	https://NABU-naturgucker.de/?bild=1895915147
BaWü	2022-08-30	8312-02-01		2	female	https://NABU-naturgucker.de/?bild=-1375972503
BaWü	2022-08-30	8312-03-01		1		https://NABU-naturgucker.de/?bild=-1335085762
BaWü	2022-08-30	8312-03-01		1	female	https://NABU-naturgucker.de/?bild=575946119
BaWü	2022-08-30	8312-03-01		1		https://NABU-naturgucker.de/?bild=-1120420622
BaWü	2022-08-30	8312-03-01	22:01:00	1	male	https://NABU-naturgucker.de/?bild=-57289719
BaWü	2022-08-30	8313-03-01		2	female	https://NABU-naturgucker.de/?bild=-782800204
BaWü	2022-08-30	8320-02-01		1		https://NABU-naturgucker.de/?bild=2071665013
BaWü	2022-08-31	8012-02-01		1	male	https://NABU-naturgucker.de/?bild=-109049415
BaWü	2022-08-31	6915-04-01	22:06:00	6		https://NABU-naturgucker.de/?bild=1837866719
BaWü	2022-08-31	8012-01-01		1	female	https://NABU-naturgucker.de/?bild=1837427714
Rh-Pf	2022-08-31	6116-01-01		3	female	https://NABU-naturgucker.de/?bild=-1693000582
Rh-Pf	2022-08-31	6116-01-01		1	female	https://NABU-naturgucker.de/?bild=684212745
Rh-Pf	2022-08-31	6116-01-01		1		https://NABU-naturgucker.de/?bild=-916193416
BaWü	2022-08-31	7519-02-01		1		https://NABU-naturgucker.de/?bild=1053505878
BB	2022-08-31	3546-01-01		1		https://NABU-naturgucker.de/?bild=-594207108
NiHB	2022-08-31	4122-04-01		2	female	https://NABU-naturgucker.de/?bild=-221562855
NRW	2022-08-31	4202-02-01		1		https://NABU-naturgucker.de/?bild=-14824495
NRW	2022-08-31	4408-03-01		1	female	https://NABU-naturgucker.de/?bild=-1734750684
NRW	2022-08-31	4605-03-01		1	female	https://NABU-naturgucker.de/?bild=1425495324
NRW	2022-08-31	4705-01-01	15:00:00	1		https://NABU-naturgucker.de/?bild=-1276563800
NRW	2022-08-31	4705-01-01	23:00:00	1	male	https://NABU-naturgucker.de/?bild=-1660524166
NRW	2022-08-31	4706-01-01		3	female	https://NABU-naturgucker.de/?bild=-1619539925
NRW	2022-08-31	4706-02-01		1	female	https://NABU-naturgucker.de/?bild=1831085395
NRW	2022-08-31	4803-02-01		1		https://NABU-naturgucker.de/?bild=-1576170533
NRW	2022-08-31	4806-01-01	16:44:00	2	female	https://NABU-naturgucker.de/?bild=307271751
NRW	2022-08-31	4815-04-01	00:00:00	1	female	https://NABU-naturgucker.de/?bild=-876418446
Thür	2022-08-31	4828-02-01		1		https://NABU-naturgucker.de/?bild=-150520500
NRW	2022-08-31	4908-01-01		1	male	https://NABU-naturgucker.de/?bild=395214808
Hes	2022-08-31	4926-02-01	21:20:00	1	female	https://NABU-naturgucker.de/?bild=1257303544
Thür	2022-08-31	4928-01-01	20:55:00	3	female	https://NABU-naturgucker.de/?bild=-1228581886
NRW	2022-08-31	5006-04-01		1		https://NABU-naturgucker.de/?bild=-265349756
NRW	2022-08-31	5007-01-01	21:20:00	1		https://NABU-naturgucker.de/?bild=-1548562919
NRW	2022-08-31	5007-01-01		1		https://NABU-naturgucker.de/?bild=1019459023
NRW	2022-08-31	5007-01-01		2		https://NABU-naturgucker.de/?bild=177570518
NRW	2022-08-31	5007-02-01		1	female	https://NABU-naturgucker.de/?bild=-988366662
NRW	2022-08-31	5007-03-01		1	female	https://NABU-naturgucker.de/?bild=1131357696
NRW	2022-08-31	5007-04-01		1	male	https://NABU-naturgucker.de/?bild=-415212360
NRW	2022-08-31	5007-04-01		1	male	https://NABU-naturgucker.de/?bild=2146759763
NRW	2022-08-31	5007-04-01		1	female	https://NABU-naturgucker.de/?bild=-329927192
NRW	2022-08-31	5007-04-01		1		https://NABU-naturgucker.de/?bild=-1772185317
NRW	2022-08-31	5007-04-01		1		https://NABU-naturgucker.de/?bild=-2004944457
NRW	2022-08-31	5007-04-01		1	female	https://NABU-naturgucker.de/?bild=912297868
NRW	2022-08-31	5007-04-01		1	female	https://NABU-naturgucker.de/?bild=-179719909
NRW	2022-08-31	5107-02-01		1	female	https://NABU-naturgucker.de/?bild=-1009351276
NRW	2022-08-31	5107-04-01		1		https://NABU-naturgucker.de/?bild=-1704867810
NRW	2022-08-31	5208-02-01	21:45:00	1	male	https://NABU-naturgucker.de/?bild=1592904719
Hes	2022-08-31	5717-04-01		1	female	https://NABU-naturgucker.de/?bild=-1144856645
Hes	2022-08-31	5817-04-01		1	female	https://NABU-naturgucker.de/?bild=109827798
Hes	2022-08-31	5818-01-01		1	male	https://NABU-naturgucker.de/?bild=1609892887
Hes	2022-08-31	5818-03-01		2	male	https://NABU-naturgucker.de/?bild=268033321
Hes	2022-08-31	5818-04-01		1	male	https://NABU-naturgucker.de/?bild=-1405475594
Hes	2022-08-31	5818-04-01		1		https://NABU-naturgucker.de/?bild=1427981003
Hes	2022-08-31	5818-04-01		1	male	https://NABU-naturgucker.de/?bild=-480327071
Hes	2022-08-31	5914-03-01	21:15:00	1		https://NABU-naturgucker.de/?bild=1290039710
Hes	2022-08-31	5915-01-01		1	male	https://NABU-naturgucker.de/?bild=-943749967
Hes	2022-08-31	5915-01-01		1	male	https://NABU-naturgucker.de/?bild=13320942
Hes	2022-08-31	5915-01-01		4		https://NABU-naturgucker.de/?bild=-1700041318
Hes	2022-08-31	5915-02-01	03:53:00	1	male	https://NABU-naturgucker.de/?bild=1528731319
Rh-Pf	2022-08-31	5915-03-01		1	male	https://NABU-naturgucker.de/?bild=-1441347914
Rh-Pf	2022-08-31	5915-03-01		1	female	https://NABU-naturgucker.de/?bild=-66302134
Hes	2022-08-31	5915-04-01		2		https://NABU-naturgucker.de/?bild=-1255800442
Hes	2022-08-31	5916-02-01		2	male	https://NABU-naturgucker.de/?bild=-1418502974
Hes	2022-08-31	5918-03-01		1	female	https://NABU-naturgucker.de/?bild=794839459
Hes	2022-08-31	5919-02-01		1	female	https://NABU-naturgucker.de/?bild=-215084397
Rh-Pf	2022-08-31	6014-01-01		1		https://NABU-naturgucker.de/?bild=1653096288
Rh-Pf	2022-08-31	6015-01-01		2	male	https://NABU-naturgucker.de/?bild=-986478173
Rh-Pf	2022-08-31	6015-01-01		1	male	https://NABU-naturgucker.de/?bild=-801597014
Rh-Pf	2022-08-31	6015-01-01		1	female	https://NABU-naturgucker.de/?bild=1962005319
Rh-Pf	2022-08-31	6015-02-01		2	female	https://NABU-naturgucker.de/?bild=629791414
Hes	2022-08-31	6016-01-01		1	female	https://NABU-naturgucker.de/?bild=-979446871
Hes	2022-08-31	6016-03-01		2	male	https://NABU-naturgucker.de/?bild=-2103424677
Hes	2022-08-31	6017-04-01	18:24:00	1	female	https://NABU-naturgucker.de/?bild=1915592291
Rh-Pf	2022-08-31	6114-02-01		1		https://NABU-naturgucker.de/?bild=851371529
Hes	2022-08-31	6116-01-01		1	female	https://NABU-naturgucker.de/?bild=-1598275396
Hes	2022-08-31	6117-01-01		1		https://NABU-naturgucker.de/?bild=408067184
Hes	2022-08-31	6117-01-01		1		https://NABU-naturgucker.de/?bild=1615323473
Hes	2022-08-31	6117-01-01		1		https://NABU-naturgucker.de/?bild=2143484107
Hes	2022-08-31	6117-02-01		1	female	https://NABU-naturgucker.de/?bild=1933357016
Hes	2022-08-31	6117-04-01		1	male	https://NABU-naturgucker.de/?bild=-614419113
Bay	2022-08-31	6125-04-01		1	female	https://NABU-naturgucker.de/?bild=1755130368
Hes	2022-08-31	6216-04-01		1	female	https://NABU-naturgucker.de/?bild=1172307527
Hes	2022-08-31	6217-04-01		1		https://NABU-naturgucker.de/?bild=-2130753880
Hes	2022-08-31	6316-01-01		1	female	https://NABU-naturgucker.de/?bild=-1370668561
Hes	2022-08-31	6316-01-01		1	male	https://NABU-naturgucker.de/?bild=-528917719
Hes	2022-08-31	6316-01-01		1	male	https://NABU-naturgucker.de/?bild=1791589423
Hes	2022-08-31	6317-02-01		1		https://NABU-naturgucker.de/?bild=324032826
Hes	2022-08-31	6416-02-01		1		https://NABU-naturgucker.de/?bild=-910694497
Rh-Pf	2022-08-31	6416-03-01		1	female	https://NABU-naturgucker.de/?bild=-1996232981
Rh-Pf	2022-08-31	6416-03-01		1		https://NABU-naturgucker.de/?bild=-616722342
Rh-Pf	2022-08-31	6416-03-01		1		https://NABU-naturgucker.de/?bild=1120526461
BaWü	2022-08-31	6416-04-01		1	male	https://NABU-naturgucker.de/?bild=-1224763482
BaWü	2022-08-31	6416-04-01		1		https://NABU-naturgucker.de/?bild=769545400
BaWü	2022-08-31	6416-04-01		1	female	https://NABU-naturgucker.de/?bild=66367124
Hes	2022-08-31	6417-01-01		1	female	https://NABU-naturgucker.de/?bild=560858119
BaWü	2022-08-31	6417-02-01		3	female	https://NABU-naturgucker.de/?bild=-1342150464
BaWü	2022-08-31	6417-02-01		1		https://NABU-naturgucker.de/?bild=-1955814875
Hes	2022-08-31	6417-03-01		2		https://NABU-naturgucker.de/?bild=1932368645
Rh-Pf	2022-08-31	6516-01-01		3		https://NABU-naturgucker.de/?bild=-175681398
BaWü	2022-08-31	6516-02-01		1	female	https://NABU-naturgucker.de/?bild=-1528198925
Rh-Pf	2022-08-31	6516-04-01		1	female	https://NABU-naturgucker.de/?bild=481050206
Rh-Pf	2022-08-31	6516-04-01		1	male	https://NABU-naturgucker.de/?bild=1620937192
BaWü	2022-08-31	6517-01-01		6		https://NABU-naturgucker.de/?bild=-728340119
BaWü	2022-08-31	6517-01-01		1	male	https://NABU-naturgucker.de/?bild=1828919576
BaWü	2022-08-31	6517-02-01		6		https://NABU-naturgucker.de/?bild=-1452987988
BaWü	2022-08-31	6517-02-01		1		https://NABU-naturgucker.de/?bild=588600236
BaWü	2022-08-31	6517-02-01		1		https://NABU-naturgucker.de/?bild=1495429677
BaWü	2022-08-31	6517-02-01		1	male	https://NABU-naturgucker.de/?bild=644398091
BaWü	2022-08-31	6517-02-01		1	female	https://NABU-naturgucker.de/?bild=-826965081
BaWü	2022-08-31	6517-02-01		1		https://NABU-naturgucker.de/?bild=-406670992
BaWü	2022-08-31	6517-02-01		1	female	https://NABU-naturgucker.de/?bild=373411585
BaWü	2022-08-31	6517-02-01		1		https://NABU-naturgucker.de/?bild=-755855268
BaWü	2022-08-31	6517-02-01		1	female	https://NABU-naturgucker.de/?bild=667646174
BaWü	2022-08-31	6517-02-01		1		https://NABU-naturgucker.de/?bild=609651885
BaWü	2022-08-31	6517-03-01		1	male	https://NABU-naturgucker.de/?bild=-1245195987
BaWü	2022-08-31	6517-04-01		4		https://NABU-naturgucker.de/?bild=-2117402939
BaWü	2022-08-31	6517-04-01		1	female	https://NABU-naturgucker.de/?bild=141340402
BaWü	2022-08-31	6517-04-01		1		https://NABU-naturgucker.de/?bild=184085891
BaWü	2022-08-31	6517-04-01		1		https://NABU-naturgucker.de/?bild=228688549
BaWü	2022-08-31	6518-01-01	08:00:00	1	male	https://NABU-naturgucker.de/?bild=-2117705995
BaWü	2022-08-31	6518-01-01		1	female	https://NABU-naturgucker.de/?bild=-2125970635
BaWü	2022-08-31	6518-03-01		1		https://NABU-naturgucker.de/?bild=-2128706060
BaWü	2022-08-31	6518-03-01		1	male	https://NABU-naturgucker.de/?bild=-802444495
BaWü	2022-08-31	6518-03-01		1		https://NABU-naturgucker.de/?bild=619281521
BaWü	2022-08-31	6518-03-01		1	female	https://NABU-naturgucker.de/?bild=-2113784295
BaWü	2022-08-31	6518-03-01		1	male	https://NABU-naturgucker.de/?bild=310314083
BaWü	2022-08-31	6518-03-01		1	female	https://NABU-naturgucker.de/?bild=289843722
BaWü	2022-08-31	6518-03-01	22:00:00	10	male	https://NABU-naturgucker.de/?bild=-1598043369
BaWü	2022-08-31	6518-03-01	21:05:00	2	male	https://NABU-naturgucker.de/?bild=-692649559
BaWü	2022-08-31	6518-03-01		1		https://NABU-naturgucker.de/?bild=1184793886
BaWü	2022-08-31	6518-04-01		30	female	https://NABU-naturgucker.de/?bild=1970537307
Rh-Pf	2022-08-31	6614-04-01		1	male	https://NABU-naturgucker.de/?bild=1285043471
Rh-Pf	2022-08-31	6615-01-01		40		https://NABU-naturgucker.de/?bild=-1765292065
Rh-Pf	2022-08-31	6615-01-01		1	female	https://NABU-naturgucker.de/?bild=1120305883
Rh-Pf	2022-08-31	6615-01-01		1	female	https://NABU-naturgucker.de/?bild=1003379861
Rh-Pf	2022-08-31	6616-04-01		1	male	https://NABU-naturgucker.de/?bild=1058308496
BaWü	2022-08-31	6617-01-01	06:00:00	1	male	https://NABU-naturgucker.de/?bild=-1356955520
BaWü	2022-08-31	6617-01-01		1		https://NABU-naturgucker.de/?bild=1342193075
BaWü	2022-08-31	6617-01-01		1		https://NABU-naturgucker.de/?bild=1542429693
BaWü	2022-08-31	6617-01-01		1	female	https://NABU-naturgucker.de/?bild=1405857747
BaWü	2022-08-31	6617-01-01		1	female	https://NABU-naturgucker.de/?bild=-401467557
BaWü	2022-08-31	6617-02-01		1		https://NABU-naturgucker.de/?bild=-2037086308
BaWü	2022-08-31	6617-03-01		1		https://NABU-naturgucker.de/?bild=-537568345
BaWü	2022-08-31	6617-03-01		1		https://NABU-naturgucker.de/?bild=-1153051183
BaWü	2022-08-31	6617-03-01		3	male	https://NABU-naturgucker.de/?bild=-1851599536
BaWü	2022-08-31	6617-03-01		1		https://NABU-naturgucker.de/?bild=-310672958
BaWü	2022-08-31	6617-04-01		1	male	https://NABU-naturgucker.de/?bild=-1390698601
BaWü	2022-08-31	6617-04-01		1		https://NABU-naturgucker.de/?bild=-802653260
BaWü	2022-08-31	6617-04-01		1		https://NABU-naturgucker.de/?bild=1613528651
BaWü	2022-08-31	6617-04-01		1	male	https://NABU-naturgucker.de/?bild=1437421720
BaWü	2022-08-31	6617-04-01		1	male	https://NABU-naturgucker.de/?bild=433486480
BaWü	2022-08-31	6617-04-01		1	male	https://NABU-naturgucker.de/?bild=900689502
BaWü	2022-08-31	6618-02-01		1		https://NABU-naturgucker.de/?bild=79744570
BaWü	2022-08-31	6618-02-01		1		https://NABU-naturgucker.de/?bild=1270256953
BaWü	2022-08-31	6618-02-01		1	female	https://NABU-naturgucker.de/?bild=1575029456
BaWü	2022-08-31	6618-02-01	23:42:00	1		https://NABU-naturgucker.de/?bild=1772719263
BaWü	2022-08-31	6618-03-01		1		https://NABU-naturgucker.de/?bild=-279496687
BaWü	2022-08-31	6618-03-01		1	female	https://NABU-naturgucker.de/?bild=896016870
BaWü	2022-08-31	6618-03-01		1		https://NABU-naturgucker.de/?bild=1698432781
BaWü	2022-08-31	6618-03-01		1	female	https://NABU-naturgucker.de/?bild=4066576
BaWü	2022-08-31	6618-04-01	01:00:00	1		https://NABU-naturgucker.de/?bild=-643944918
Rh-Pf	2022-08-31	6714-02-01		1	male	https://NABU-naturgucker.de/?bild=256112649
Rh-Pf	2022-08-31	6714-03-01		1		https://NABU-naturgucker.de/?bild=-714867054
Rh-Pf	2022-08-31	6716-01-01		1	male	https://NABU-naturgucker.de/?bild=1503598306
Rh-Pf	2022-08-31	6716-01-01	22:45:00	2	female	https://NABU-naturgucker.de/?bild=544391630
Rh-Pf	2022-08-31	6716-01-01		1	female	https://NABU-naturgucker.de/?bild=-408812677
Rh-Pf	2022-08-31	6716-03-01		1		https://NABU-naturgucker.de/?bild=26995045
Rh-Pf	2022-08-31	6716-03-01		1	male	https://NABU-naturgucker.de/?bild=1291269825
Rh-Pf	2022-08-31	6716-03-01		1		https://NABU-naturgucker.de/?bild=-1097461904
BaWü	2022-08-31	6716-04-01		1	male	https://NABU-naturgucker.de/?bild=1936143246
BaWü	2022-08-31	6717-02-01		1	female	https://NABU-naturgucker.de/?bild=-419236581
BaWü	2022-08-31	6717-02-01	21:14:00	1		https://NABU-naturgucker.de/?bild=-1543119042
BaWü	2022-08-31	6717-02-01	12:59:00	1	male	https://NABU-naturgucker.de/?bild=817353686
BaWü	2022-08-31	6717-04-01	08:30:00	1	male	https://NABU-naturgucker.de/?bild=955028048
BaWü	2022-08-31	6718-01-01		1	male	https://NABU-naturgucker.de/?bild=-979290966
BaWü	2022-08-31	6718-01-01		1		https://NABU-naturgucker.de/?bild=-523887577
BaWü	2022-08-31	6718-01-01		1		https://NABU-naturgucker.de/?bild=51650006
BaWü	2022-08-31	6718-01-01		1	female	https://NABU-naturgucker.de/?bild=963471017
BaWü	2022-08-31	6718-01-01		1		https://NABU-naturgucker.de/?bild=1919556815
BaWü	2022-08-31	6718-01-01		1	female	https://NABU-naturgucker.de/?bild=-127253439
BaWü	2022-08-31	6718-01-01		1		https://NABU-naturgucker.de/?bild=681810282
BaWü	2022-08-31	6718-01-01		1		https://NABU-naturgucker.de/?bild=456711027
BaWü	2022-08-31	6718-03-01	22:05:00	1	female	https://NABU-naturgucker.de/?bild=-2016304850
BaWü	2022-08-31	6719-01-01		1	female	https://NABU-naturgucker.de/?bild=-2126777099
BaWü	2022-08-31	6719-01-01		2	male	https://NABU-naturgucker.de/?bild=-1784700968
BaWü	2022-08-31	6719-01-01		1		https://NABU-naturgucker.de/?bild=-695969688
BaWü	2022-08-31	6719-01-01		1	female	https://NABU-naturgucker.de/?bild=698799330
BaWü	2022-08-31	6719-01-01		1	male	https://NABU-naturgucker.de/?bild=-1770113898
BaWü	2022-08-31	6719-01-01		1	female	https://NABU-naturgucker.de/?bild=-1847538143
BaWü	2022-08-31	6719-01-01		1	male	https://NABU-naturgucker.de/?bild=-1644817675
BaWü	2022-08-31	6719-01-01		1	female	https://NABU-naturgucker.de/?bild=-1044814443
BaWü	2022-08-31	6719-03-01	06:30:00	1	female	https://NABU-naturgucker.de/?bild=-676580614
BaWü	2022-08-31	6719-03-01		1		https://NABU-naturgucker.de/?bild=-448832942
BaWü	2022-08-31	6719-03-01		1	female	https://NABU-naturgucker.de/?bild=1832661241
BaWü	2022-08-31	6816-02-01		1	male	https://NABU-naturgucker.de/?bild=-1283816465
BaWü	2022-08-31	6816-02-01		1		https://NABU-naturgucker.de/?bild=-704517078
BaWü	2022-08-31	6816-02-01		1		https://NABU-naturgucker.de/?bild=-518310023
BaWü	2022-08-31	6816-04-01		2	male	https://NABU-naturgucker.de/?bild=-1596647690
BaWü	2022-08-31	6816-04-01		1		https://NABU-naturgucker.de/?bild=296551155
BaWü	2022-08-31	6817-01-01		1		https://NABU-naturgucker.de/?bild=-1324674549
BaWü	2022-08-31	6817-01-01	00:10:00	1	male	https://NABU-naturgucker.de/?bild=1557225468
BaWü	2022-08-31	6817-02-01	22:06:00	1		https://NABU-naturgucker.de/?bild=-158315170
BaWü	2022-08-31	6817-03-01		1	female	https://NABU-naturgucker.de/?bild=-1843873494
BaWü	2022-08-31	6820-01-01		1		https://NABU-naturgucker.de/?bild=-46818024
BaWü	2022-08-31	6820-02-01		1	female	https://NABU-naturgucker.de/?bild=2070794405
BaWü	2022-08-31	6821-03-01		3	female	https://NABU-naturgucker.de/?bild=-1303138620
BaWü	2022-08-31	6821-03-01	21:04:00	1		https://NABU-naturgucker.de/?bild=24233097
BaWü	2022-08-31	6824-03-01		2	male	https://NABU-naturgucker.de/?bild=-506310503
BaWü	2022-08-31	6916-01-01		1	male	https://NABU-naturgucker.de/?bild=-1227558761
BaWü	2022-08-31	6916-02-01		1	female	https://NABU-naturgucker.de/?bild=-26373640
BaWü	2022-08-31	6916-02-01		1	male	https://NABU-naturgucker.de/?bild=-1540301390
BaWü	2022-08-31	6916-03-01		1	male	https://NABU-naturgucker.de/?bild=-1905414626
BaWü	2022-08-31	6916-03-01		1		https://NABU-naturgucker.de/?bild=287221752
BaWü	2022-08-31	6916-03-01		1	female	https://NABU-naturgucker.de/?bild=682070635
BaWü	2022-08-31	6916-03-01		1	female	https://NABU-naturgucker.de/?bild=-1774812104
BaWü	2022-08-31	6916-03-01		1		https://NABU-naturgucker.de/?bild=-1435860997
BaWü	2022-08-31	6916-03-01		2		https://NABU-naturgucker.de/?bild=1520743483
BaWü	2022-08-31	6916-03-01	01:00:00	1	male	https://NABU-naturgucker.de/?bild=-1250129181
BaWü	2022-08-31	6916-04-01		2	female	https://NABU-naturgucker.de/?bild=-1341579962
BaWü	2022-08-31	6916-04-01		1	female	https://NABU-naturgucker.de/?bild=1762527566
BaWü	2022-08-31	6916-04-01		1		https://NABU-naturgucker.de/?bild=-968132507
BaWü	2022-08-31	6916-04-01		1	female	https://NABU-naturgucker.de/?bild=2100768155
BaWü	2022-08-31	6916-04-01		1		https://NABU-naturgucker.de/?bild=1372762598
BaWü	2022-08-31	6916-04-01		1		https://NABU-naturgucker.de/?bild=1496929508
BaWü	2022-08-31	6916-04-01		1	female	https://NABU-naturgucker.de/?bild=171317234
BaWü	2022-08-31	6916-04-01		1		https://NABU-naturgucker.de/?bild=-383001478
BaWü	2022-08-31	6917-01-01		1	male	https://NABU-naturgucker.de/?bild=-1964713682
BaWü	2022-08-31	6917-01-01		1	female	https://NABU-naturgucker.de/?bild=680067952
BaWü	2022-08-31	6917-01-01		1	male	https://NABU-naturgucker.de/?bild=298666181
BaWü	2022-08-31	6917-01-01		1	male	https://NABU-naturgucker.de/?bild=1517850834
BaWü	2022-08-31	6917-03-01		1	male	https://NABU-naturgucker.de/?bild=-345675927
BaWü	2022-08-31	6917-03-01	20:46:00	1	female	https://NABU-naturgucker.de/?bild=1301400624
BaWü	2022-08-31	6918-02-01		1	male	https://NABU-naturgucker.de/?bild=1807911910
BaWü	2022-08-31	7015-02-01		2	female	https://NABU-naturgucker.de/?bild=-1138456693
BaWü	2022-08-31	7015-02-01		1		https://NABU-naturgucker.de/?bild=-456681630
BaWü	2022-08-31	7015-03-01		1	female	https://NABU-naturgucker.de/?bild=1686696357
BaWü	2022-08-31	7015-04-01	01:08:00	1		https://NABU-naturgucker.de/?bild=601044398
BaWü	2022-08-31	7016-01-01		1		https://NABU-naturgucker.de/?bild=-1731179719
BaWü	2022-08-31	7016-01-01		1	female	https://NABU-naturgucker.de/?bild=-75275563
BaWü	2022-08-31	7016-01-01		1	female	https://NABU-naturgucker.de/?bild=1433411104
BaWü	2022-08-31	7016-01-01	17:00:00	1		https://NABU-naturgucker.de/?bild=-1175481542
BaWü	2022-08-31	7016-01-01		1	male	https://NABU-naturgucker.de/?bild=-1410294415
BaWü	2022-08-31	7016-01-01		1	male	https://NABU-naturgucker.de/?bild=1351104278
BaWü	2022-08-31	7016-01-01		1	female	https://NABU-naturgucker.de/?bild=1598329020
BaWü	2022-08-31	7016-01-01		1	female	https://NABU-naturgucker.de/?bild=56241710
BaWü	2022-08-31	7016-01-01		1		https://NABU-naturgucker.de/?bild=1053035554
BaWü	2022-08-31	7016-02-01		1	female	https://NABU-naturgucker.de/?bild=-1838194594
BaWü	2022-08-31	7016-02-01		1	female	https://NABU-naturgucker.de/?bild=-675023074
BaWü	2022-08-31	7016-02-01		1		https://NABU-naturgucker.de/?bild=-312468769
BaWü	2022-08-31	7016-03-01		30		https://NABU-naturgucker.de/?bild=-1936734850
BaWü	2022-08-31	7016-03-01		1	male	https://NABU-naturgucker.de/?bild=593141943
BaWü	2022-08-31	7016-03-01		1	female	https://NABU-naturgucker.de/?bild=2140340563
BaWü	2022-08-31	7017-01-01	21:00:00	1	male	https://NABU-naturgucker.de/?bild=-288661263
BaWü	2022-08-31	7017-01-01		1		https://NABU-naturgucker.de/?bild=-1819101428
BaWü	2022-08-31	7017-01-01		1		https://NABU-naturgucker.de/?bild=454641691
BaWü	2022-08-31	7017-01-01		1	male	https://NABU-naturgucker.de/?bild=-1442673727
BaWü	2022-08-31	7017-03-01	20:30:00	1		https://NABU-naturgucker.de/?bild=-1046431673
BaWü	2022-08-31	7020-01-01	18:30:00	1	male	https://NABU-naturgucker.de/?bild=-1564182308
BaWü	2022-08-31	7020-01-01		1		https://NABU-naturgucker.de/?bild=-260362863
BaWü	2022-08-31	7020-02-01		1	male	https://NABU-naturgucker.de/?bild=-1871389501
BaWü	2022-08-31	7020-02-01		1		https://NABU-naturgucker.de/?bild=231824582
BaWü	2022-08-31	7020-04-01		1		https://NABU-naturgucker.de/?bild=723212384
BaWü	2022-08-31	7020-04-01		2		https://NABU-naturgucker.de/?bild=-303216262
BaWü	2022-08-31	7020-04-01		1	male	https://NABU-naturgucker.de/?bild=1265497828
BaWü	2022-08-31	7021-01-01		5		https://NABU-naturgucker.de/?bild=-1702169865
BaWü	2022-08-31	7021-02-01	08:30:00	1		https://NABU-naturgucker.de/?bild=417223085
BaWü	2022-08-31	7021-03-01		1		https://NABU-naturgucker.de/?bild=996734769
BaWü	2022-08-31	7021-03-01		2		https://NABU-naturgucker.de/?bild=-1677927187
BaWü	2022-08-31	7021-03-01		1		https://NABU-naturgucker.de/?bild=-1358464825
BaWü	2022-08-31	7021-04-01		1		https://NABU-naturgucker.de/?bild=-1356060373
BaWü	2022-08-31	7021-04-01		1		https://NABU-naturgucker.de/?bild=-459529593
BaWü	2022-08-31	7115-01-01		1	male	https://NABU-naturgucker.de/?bild=-2005848007
BaWü	2022-08-31	7115-01-01		1		https://NABU-naturgucker.de/?bild=1404710245
BaWü	2022-08-31	7115-01-01		1	female	https://NABU-naturgucker.de/?bild=1536423158
BaWü	2022-08-31	7115-01-01		1	male	https://NABU-naturgucker.de/?bild=-1225716855
BaWü	2022-08-31	7115-01-01		1		https://NABU-naturgucker.de/?bild=-438410679
BaWü	2022-08-31	7115-01-01		1	male	https://NABU-naturgucker.de/?bild=1034638800
BaWü	2022-08-31	7115-02-01		7	male	https://NABU-naturgucker.de/?bild=2143824687
BaWü	2022-08-31	7115-02-01		1		https://NABU-naturgucker.de/?bild=-143194599
BaWü	2022-08-31	7115-04-01		4	female	https://NABU-naturgucker.de/?bild=-1867238145
BaWü	2022-08-31	7115-04-01		1	female	https://NABU-naturgucker.de/?bild=1611667032
BaWü	2022-08-31	7115-04-01		1		https://NABU-naturgucker.de/?bild=388681126
BaWü	2022-08-31	7116-03-01		3	female	https://NABU-naturgucker.de/?bild=-93329656
BaWü	2022-08-31	7116-03-01		1	female	https://NABU-naturgucker.de/?bild=2052081576
BaWü	2022-08-31	7117-02-01		1	male	https://NABU-naturgucker.de/?bild=460905016
BaWü	2022-08-31	7118-01-01	21:30:00	1		https://NABU-naturgucker.de/?bild=-709625324
BaWü	2022-08-31	7120-03-01		1	female	https://NABU-naturgucker.de/?bild=-94066640
BaWü	2022-08-31	7120-03-01		1		https://NABU-naturgucker.de/?bild=1515376135
BaWü	2022-08-31	7120-03-01		1	male	https://NABU-naturgucker.de/?bild=-938032133
BaWü	2022-08-31	7120-04-01		2	male	https://NABU-naturgucker.de/?bild=-2066281874
BaWü	2022-08-31	7121-01-01		1	female	https://NABU-naturgucker.de/?bild=-196085999
BaWü	2022-08-31	7121-01-01		1		https://NABU-naturgucker.de/?bild=-1405165754
BaWü	2022-08-31	7121-01-01		1	female	https://NABU-naturgucker.de/?bild=-951255822
BaWü	2022-08-31	7121-02-01		3		https://NABU-naturgucker.de/?bild=-1094389857
BaWü	2022-08-31	7121-02-01		1		https://NABU-naturgucker.de/?bild=2016845524
BaWü	2022-08-31	7121-02-01		1	female	https://NABU-naturgucker.de/?bild=-1148879499
BaWü	2022-08-31	7121-03-01	14:15:00	1	female	https://NABU-naturgucker.de/?bild=-1164329107
BaWü	2022-08-31	7121-04-01		1	female	https://NABU-naturgucker.de/?bild=-742124389
BaWü	2022-08-31	7121-04-01		1		https://NABU-naturgucker.de/?bild=-146482299
BaWü	2022-08-31	7121-04-01		1		https://NABU-naturgucker.de/?bild=-1853244824
BaWü	2022-08-31	7121-04-01		1	male	https://NABU-naturgucker.de/?bild=581018350
BaWü	2022-08-31	7121-04-01		1	female	https://NABU-naturgucker.de/?bild=-846402250
BaWü	2022-08-31	7122-03-01		1		https://NABU-naturgucker.de/?bild=-2095668662
BaWü	2022-08-31	7215-01-01		2		https://NABU-naturgucker.de/?bild=502170882
BaWü	2022-08-31	7215-01-01	07:45:00	1	male	https://NABU-naturgucker.de/?bild=-803271301
BaWü	2022-08-31	7215-02-01	14:40:00	1	male	https://NABU-naturgucker.de/?bild=-351386936
BaWü	2022-08-31	7215-03-01		2		https://NABU-naturgucker.de/?bild=-120951300
BaWü	2022-08-31	7216-02-01		1	male	https://NABU-naturgucker.de/?bild=-996362755
BaWü	2022-08-31	7216-03-01		1	female	https://NABU-naturgucker.de/?bild=-1693945890
BaWü	2022-08-31	7220-04-01		1	male	https://NABU-naturgucker.de/?bild=1144714531
BaWü	2022-08-31	7221-01-01		1	male	https://NABU-naturgucker.de/?bild=-1621918653
BaWü	2022-08-31	7221-01-01		1	female	https://NABU-naturgucker.de/?bild=532136469
BaWü	2022-08-31	7221-01-01		1	male	https://NABU-naturgucker.de/?bild=-1329737117
BaWü	2022-08-31	7221-01-01		1	male	https://NABU-naturgucker.de/?bild=1526109780
BaWü	2022-08-31	7221-01-01		1	female	https://NABU-naturgucker.de/?bild=-1613906329
BaWü	2022-08-31	7221-01-01		1	female	https://NABU-naturgucker.de/?bild=762540728
BaWü	2022-08-31	7221-02-01		10	male	https://NABU-naturgucker.de/?bild=-1694872590
BaWü	2022-08-31	7221-03-01	22:00:00	1	male	https://NABU-naturgucker.de/?bild=-1202087044
BaWü	2022-08-31	7221-04-01		4	male	https://NABU-naturgucker.de/?bild=-1712306598
BaWü	2022-08-31	7221-04-01		1		https://NABU-naturgucker.de/?bild=-561732501
BaWü	2022-08-31	7221-04-01		2		https://NABU-naturgucker.de/?bild=-2032003582
BaWü	2022-08-31	7221-04-01		1	male	https://NABU-naturgucker.de/?bild=1308156814
BaWü	2022-08-31	7222-03-01	18:12:00	1		https://NABU-naturgucker.de/?bild=-1724291613
BaWü	2022-08-31	7223-02-01		1	male	https://NABU-naturgucker.de/?bild=-2096385689
BaWü	2022-08-31	7223-04-01	22:00:00	1	female	https://NABU-naturgucker.de/?bild=-2001083748
BaWü	2022-08-31	7313-02-01		1	male	https://NABU-naturgucker.de/?bild=-837295219
BaWü	2022-08-31	7313-02-01		2	male	https://NABU-naturgucker.de/?bild=1747330722
BaWü	2022-08-31	7313-03-01		1	male	https://NABU-naturgucker.de/?bild=-934008782
BaWü	2022-08-31	7314-04-01		1	male	https://NABU-naturgucker.de/?bild=-1670262522
BaWü	2022-08-31	7314-04-01		1	male	https://NABU-naturgucker.de/?bild=-630690777
BaWü	2022-08-31	7320-01-01		1	female	https://NABU-naturgucker.de/?bild=1864935897
BaWü	2022-08-31	7413-02-01	21:37:00	1		https://NABU-naturgucker.de/?bild=2063095601
BaWü	2022-08-31	7421-01-01		1	male	https://NABU-naturgucker.de/?bild=-69275822
BaWü	2022-08-31	7421-03-01		1	female	https://NABU-naturgucker.de/?bild=-2144466964
BaWü	2022-08-31	7513-01-01		1	male	https://NABU-naturgucker.de/?bild=-1134603506
BaWü	2022-08-31	7513-02-01		3		https://NABU-naturgucker.de/?bild=-2005134055
BaWü	2022-08-31	7513-02-01		1	female	https://NABU-naturgucker.de/?bild=1201015978
BaWü	2022-08-31	7513-02-01		1		https://NABU-naturgucker.de/?bild=618274733
BaWü	2022-08-31	7513-02-01		1		https://NABU-naturgucker.de/?bild=1014708276
BaWü	2022-08-31	7513-02-01		1	male	https://NABU-naturgucker.de/?bild=1787210972
BaWü	2022-08-31	7513-02-01		1		https://NABU-naturgucker.de/?bild=1868174043
BaWü	2022-08-31	7513-02-01		1	male	https://NABU-naturgucker.de/?bild=-868533322
BaWü	2022-08-31	7513-02-01		1	female	https://NABU-naturgucker.de/?bild=1364489220
BaWü	2022-08-31	7513-02-01		1	male	https://NABU-naturgucker.de/?bild=474296951
BaWü	2022-08-31	7513-02-01		1	male	https://NABU-naturgucker.de/?bild=388121387
BaWü	2022-08-31	7513-03-01		1	male	https://NABU-naturgucker.de/?bild=-625891264
BaWü	2022-08-31	7513-04-01		1		https://NABU-naturgucker.de/?bild=223112852
BaWü	2022-08-31	7514-01-01		1	male	https://NABU-naturgucker.de/?bild=-614771220
BaWü	2022-08-31	7514-03-01		1		https://NABU-naturgucker.de/?bild=-934550489
BaWü	2022-08-31	7519-02-01	01:00:00	1		https://NABU-naturgucker.de/?bild=794660054
BaWü	2022-08-31	7613-03-01		1	female	https://NABU-naturgucker.de/?bild=-1772280195
BaWü	2022-08-31	7613-03-01		1	male	https://NABU-naturgucker.de/?bild=-2023786953
BaWü	2022-08-31	7614-03-01		1	male	https://NABU-naturgucker.de/?bild=-1849860320
BaWü	2022-08-31	7712-02-01		1	female	https://NABU-naturgucker.de/?bild=-366990388
BaWü	2022-08-31	7712-04-01	20:00:00	1	male	https://NABU-naturgucker.de/?bild=228200617
BaWü	2022-08-31	7714-02-01		1		https://NABU-naturgucker.de/?bild=-1207965840
BaWü	2022-08-31	7812-04-01	07:30:00	1	female	https://NABU-naturgucker.de/?bild=-1317213937
BaWü	2022-08-31	7813-03-01		1		https://NABU-naturgucker.de/?bild=-2070726454
BaWü	2022-08-31	7813-03-01		1	male	https://NABU-naturgucker.de/?bild=-435946454
BaWü	2022-08-31	7813-03-01		5		https://NABU-naturgucker.de/?bild=-618507077
BaWü	2022-08-31	7813-03-01		1		https://NABU-naturgucker.de/?bild=-424725207
BaWü	2022-08-31	7813-04-01		1	male	https://NABU-naturgucker.de/?bild=1472984502
BaWü	2022-08-31	7912-02-01		1		https://NABU-naturgucker.de/?bild=329144787
BaWü	2022-08-31	7912-02-01		1	male	https://NABU-naturgucker.de/?bild=862537069
BaWü	2022-08-31	7912-04-01		1	male	https://NABU-naturgucker.de/?bild=202304614
BaWü	2022-08-31	7912-04-01		1	female	https://NABU-naturgucker.de/?bild=-1695983332
BaWü	2022-08-31	7912-04-01	17:21:00	1		https://NABU-naturgucker.de/?bild=1418287950
BaWü	2022-08-31	7912-04-01		1	female	https://NABU-naturgucker.de/?bild=1993116102
BaWü	2022-08-31	7912-04-01		1		https://NABU-naturgucker.de/?bild=1393103837
BaWü	2022-08-31	7913-01-01		1		https://NABU-naturgucker.de/?bild=-1983544482
BaWü	2022-08-31	7913-02-01		5		https://NABU-naturgucker.de/?bild=768911816
BaWü	2022-08-31	7913-03-01		4		https://NABU-naturgucker.de/?bild=-1948390504
BaWü	2022-08-31	7913-03-01		1	male	https://NABU-naturgucker.de/?bild=1205566958
BaWü	2022-08-31	7913-03-01		1	female	https://NABU-naturgucker.de/?bild=-1742257878
BaWü	2022-08-31	7913-03-01		1	male	https://NABU-naturgucker.de/?bild=-51695921
BaWü	2022-08-31	7913-03-01		1	male	https://NABU-naturgucker.de/?bild=1040324843
BaWü	2022-08-31	7913-03-01		1		https://NABU-naturgucker.de/?bild=-1104883405
BaWü	2022-08-31	7913-03-01		1	male	https://NABU-naturgucker.de/?bild=-227723798
BaWü	2022-08-31	7913-03-01		1	male	https://NABU-naturgucker.de/?bild=-723870644
BaWü	2022-08-31	7913-03-01		1		https://NABU-naturgucker.de/?bild=263534007
BaWü	2022-08-31	7913-03-01		1		https://NABU-naturgucker.de/?bild=2114209862
BaWü	2022-08-31	7914-03-01		3	female	https://NABU-naturgucker.de/?bild=2011715168
Bay	2022-08-31	7934-01-01		1	female	https://NABU-naturgucker.de/?bild=-468243101
BaWü	2022-08-31	8012-01-01		1		https://NABU-naturgucker.de/?bild=240723722
BaWü	2022-08-31	8012-01-01		1	male	https://NABU-naturgucker.de/?bild=784925926
BaWü	2022-08-31	8012-01-01		1		https://NABU-naturgucker.de/?bild=1765739460
BaWü	2022-08-31	8012-02-01		3	female	https://NABU-naturgucker.de/?bild=-1818554682
BaWü	2022-08-31	8012-02-01		1		https://NABU-naturgucker.de/?bild=1923187495
BaWü	2022-08-31	8012-02-01	22:36:00	1	male	https://NABU-naturgucker.de/?bild=-1473915487
BaWü	2022-08-31	8012-02-01	00:00:00	1	male	https://NABU-naturgucker.de/?bild=2126826364
BaWü	2022-08-31	8012-02-01		2		https://NABU-naturgucker.de/?bild=454781129
BaWü	2022-08-31	8012-03-01		6	female	https://NABU-naturgucker.de/?bild=-56811879
BaWü	2022-08-31	8012-03-01		1		https://NABU-naturgucker.de/?bild=1686997553
BaWü	2022-08-31	8012-03-01		1	male	https://NABU-naturgucker.de/?bild=1393278242
BaWü	2022-08-31	8012-03-01		1	female	https://NABU-naturgucker.de/?bild=451774433
BaWü	2022-08-31	8013-01-01		1	male	https://NABU-naturgucker.de/?bild=-607898199
BaWü	2022-08-31	8013-01-01		1		https://NABU-naturgucker.de/?bild=1477584678
BaWü	2022-08-31	8013-01-01		1	female	https://NABU-naturgucker.de/?bild=-213543112
BaWü	2022-08-31	8013-01-01		1	female	https://NABU-naturgucker.de/?bild=576943930
BaWü	2022-08-31	8013-01-01		1	female	https://NABU-naturgucker.de/?bild=-2008161560
BaWü	2022-08-31	8013-01-01	10:54:00	2	female	https://NABU-naturgucker.de/?bild=-351637534
BaWü	2022-08-31	8013-01-01	21:30:00	1	female	https://NABU-naturgucker.de/?bild=-2110434184
BaWü	2022-08-31	8111-04-01		1	male	https://NABU-naturgucker.de/?bild=-2125531247
BaWü	2022-08-31	8111-04-01		1		https://NABU-naturgucker.de/?bild=481374692
BaWü	2022-08-31	8111-04-01		1		https://NABU-naturgucker.de/?bild=107545210
BaWü	2022-08-31	8112-01-01		1	female	https://NABU-naturgucker.de/?bild=-1149332767
BaWü	2022-08-31	8112-01-01	21:15:00	1	male	https://NABU-naturgucker.de/?bild=347232848
BaWü	2022-08-31	8211-02-01	22:45:00	1	female	https://NABU-naturgucker.de/?bild=-1730085833
BaWü	2022-08-31	8211-02-01		1		https://NABU-naturgucker.de/?bild=-740496747
BaWü	2022-08-31	8211-02-01		1		https://NABU-naturgucker.de/?bild=-1295325149
BaWü	2022-08-31	8211-04-01		1		https://NABU-naturgucker.de/?bild=-714124787
BaWü	2022-08-31	8219-02-01		1		https://NABU-naturgucker.de/?bild=1903831070
BaWü	2022-08-31	8312-02-01		1	female	https://NABU-naturgucker.de/?bild=61496702
BaWü	2022-08-31	8312-03-01		1		https://NABU-naturgucker.de/?bild=-226336758
BaWü	2022-08-31	8312-03-01	22:10:00	1	male	https://NABU-naturgucker.de/?bild=1557359903
BaWü	2022-08-31	8321-01-01		3	male	https://NABU-naturgucker.de/?bild=-520608420
BaWü	2022-08-31	8413-02-01		1	female	https://NABU-naturgucker.de/?bild=1119348036
Bay	2022-08-31	8423-02-01		1	male	https://NABU-naturgucker.de/?bild=-902772425
BaWü	2022-09-01	7020-04-01	09:25:00	1	female	https://NABU-naturgucker.de/?bild=-1980926313
BaWü	2022-09-01	7913-01-01		1		https://NABU-naturgucker.de/?bild=-884698683
BaWü	2022-09-01	7016-03-01		2	male	https://NABU-naturgucker.de/?bild=-2053980749
BaWü	2022-09-01	6517-01-01	18:58:00	1	female	https://NABU-naturgucker.de/?bild=1810082019
BaWü	2022-09-01	7216-01-01			male	https://NABU-naturgucker.de/?bild=912892945
Hes	2022-09-01	6018-01-01	20:00:00	1	male	https://NABU-naturgucker.de/?bild=-1531697669
SHHH	2022-09-01	2326-04-01		1		https://NABU-naturgucker.de/?bild=-1431503221
NRW	2022-09-01	3911-02-01		1	male	https://NABU-naturgucker.de/?bild=633626893
NRW	2022-09-01	4011-04-01		1	male	https://NABU-naturgucker.de/?bild=-1417830235
NRW	2022-09-01	4105-04-01		2		https://NABU-naturgucker.de/?bild=-1350798476
NRW	2022-09-01	4410-03-01		2		https://NABU-naturgucker.de/?bild=166623563
NRW	2022-09-01	4506-03-01		1		https://NABU-naturgucker.de/?bild=1672530120
NRW	2022-09-01	4509-01-01		1	female	https://NABU-naturgucker.de/?bild=-1652940450
NRW	2022-09-01	4510-02-01		1	male	https://NABU-naturgucker.de/?bild=-1835890940
NRW	2022-09-01	4605-03-01		1	male	https://NABU-naturgucker.de/?bild=-29316521
NRW	2022-09-01	4610-02-01		3	female	https://NABU-naturgucker.de/?bild=-284023236
NRW	2022-09-01	4704-02-01		1		https://NABU-naturgucker.de/?bild=1228523809
NRW	2022-09-01	4704-02-01	22:05:00	1	female	https://NABU-naturgucker.de/?bild=1006607865
NRW	2022-09-01	4705-01-01		3		https://NABU-naturgucker.de/?bild=1942012200
NRW	2022-09-01	4705-03-01		1		https://NABU-naturgucker.de/?bild=-791339225
NRW	2022-09-01	4705-03-01		1	female	https://NABU-naturgucker.de/?bild=2021568615
NRW	2022-09-01	4705-04-01		1	female	https://NABU-naturgucker.de/?bild=-1792329832
NRW	2022-09-01	4705-04-01		1	female	https://NABU-naturgucker.de/?bild=251359331
NRW	2022-09-01	4705-04-01		1		https://NABU-naturgucker.de/?bild=-1249960721
NRW	2022-09-01	4706-03-01		2	male	https://NABU-naturgucker.de/?bild=-673817344
NRW	2022-09-01	4706-03-01	15:00:00	1	male	https://NABU-naturgucker.de/?bild=-1573110557
NRW	2022-09-01	4706-04-01		1	male	https://NABU-naturgucker.de/?bild=-141296360
NRW	2022-09-01	4805-01-01		2	female	https://NABU-naturgucker.de/?bild=-1680400081
NRW	2022-09-01	4806-01-01		3	female	https://NABU-naturgucker.de/?bild=-1258813299
NRW	2022-09-01	4807-01-01		1		https://NABU-naturgucker.de/?bild=-1970629278
NRW	2022-09-01	4807-02-01		1	male	https://NABU-naturgucker.de/?bild=-543653950
NRW	2022-09-01	5006-01-01		1	female	https://NABU-naturgucker.de/?bild=952227454
NRW	2022-09-01	5007-01-01		1	male	https://NABU-naturgucker.de/?bild=-1282278674
NRW	2022-09-01	5007-03-01		1	female	https://NABU-naturgucker.de/?bild=-1806331889
NRW	2022-09-01	5007-04-01		1		https://NABU-naturgucker.de/?bild=1476441617
NRW	2022-09-01	5007-04-01		1	male	https://NABU-naturgucker.de/?bild=-1257894080
NRW	2022-09-01	5009-01-01		1	male	https://NABU-naturgucker.de/?bild=563528674
NRW	2022-09-01	5209-03-01		5		https://NABU-naturgucker.de/?bild=-927303009
NRW	2022-09-01	5308-04-01		1	male	https://NABU-naturgucker.de/?bild=-19743691
Rh-Pf	2022-09-01	5612-03-01	23:00:00	1	female	https://NABU-naturgucker.de/?bild=834701951
Hes	2022-09-01	5717-03-01		1		https://NABU-naturgucker.de/?bild=-1738346418
Hes	2022-09-01	5817-04-01	16:53:00	1	male	https://NABU-naturgucker.de/?bild=-586179093
Hes	2022-09-01	5818-03-01		2	female	https://NABU-naturgucker.de/?bild=-1761307437
Hes	2022-09-01	5818-03-01		1	male	https://NABU-naturgucker.de/?bild=-405875835
Hes	2022-09-01	5818-03-01		1	male	https://NABU-naturgucker.de/?bild=-1607329846
Hes	2022-09-01	5818-03-01		1	female	https://NABU-naturgucker.de/?bild=1042281552
Hes	2022-09-01	5818-04-01		1	male	https://NABU-naturgucker.de/?bild=-1625906847
Hes	2022-09-01	5818-04-01		1	female	https://NABU-naturgucker.de/?bild=-1837508945
Hes	2022-09-01	5914-04-01		1		https://NABU-naturgucker.de/?bild=-1587142951
Hes	2022-09-01	5914-04-01		1	male	https://NABU-naturgucker.de/?bild=1295251395
Hes	2022-09-01	5915-01-01		1	female	https://NABU-naturgucker.de/?bild=1270242771
Hes	2022-09-01	5915-01-01		1	male	https://NABU-naturgucker.de/?bild=2118442893
Hes	2022-09-01	5915-01-01		1	male	https://NABU-naturgucker.de/?bild=1469608196
Hes	2022-09-01	5915-01-01		1	female	https://NABU-naturgucker.de/?bild=1883653786
Hes	2022-09-01	5915-01-01		3		https://NABU-naturgucker.de/?bild=-1240821422
Hes	2022-09-01	5915-01-01	23:30:00	2		https://NABU-naturgucker.de/?bild=-1031083319
Hes	2022-09-01	5916-04-01		1	male	https://NABU-naturgucker.de/?bild=667790382
Hes	2022-09-01	5917-02-01		1	female	https://NABU-naturgucker.de/?bild=603392720
Rh-Pf	2022-09-01	6014-04-01		1	female	https://NABU-naturgucker.de/?bild=-259886007
Rh-Pf	2022-09-01	6015-01-01	19:48:00	1		https://NABU-naturgucker.de/?bild=-171540908
Rh-Pf	2022-09-01	6015-01-01	10:00:00	1	female	https://NABU-naturgucker.de/?bild=-661240757
Rh-Pf	2022-09-01	6015-01-01		1	male	https://NABU-naturgucker.de/?bild=-1043510505
Rh-Pf	2022-09-01	6015-02-01		1		https://NABU-naturgucker.de/?bild=-792964652
Rh-Pf	2022-09-01	6015-02-01		1		https://NABU-naturgucker.de/?bild=-223353972
Rh-Pf	2022-09-01	6015-02-01		1	male	https://NABU-naturgucker.de/?bild=712337649
Rh-Pf	2022-09-01	6015-03-01		1	female	https://NABU-naturgucker.de/?bild=-413356463
Rh-Pf	2022-09-01	6015-04-01		1	female	https://NABU-naturgucker.de/?bild=-656440267
Hes	2022-09-01	6016-01-01		1	female	https://NABU-naturgucker.de/?bild=11738470
Hes	2022-09-01	6016-01-01		1		https://NABU-naturgucker.de/?bild=2024827389
Hes	2022-09-01	6017-04-01	09:35:00	1		https://NABU-naturgucker.de/?bild=1794048054
Bay	2022-09-01	6021-01-01		5	female	https://NABU-naturgucker.de/?bild=1000585118
Rh-Pf	2022-09-01	6115-01-01		3	female	https://NABU-naturgucker.de/?bild=-1327095538
Rh-Pf	2022-09-01	6115-02-01	23:20:00	2		https://NABU-naturgucker.de/?bild=-1924527684
Hes	2022-09-01	6116-01-01		1	male	https://NABU-naturgucker.de/?bild=-2075513512
Hes	2022-09-01	6116-01-01		1	female	https://NABU-naturgucker.de/?bild=-1503372573
Hes	2022-09-01	6116-01-01		1	female	https://NABU-naturgucker.de/?bild=1241458658
Hes	2022-09-01	6117-01-01		1		https://NABU-naturgucker.de/?bild=-2100755826
Hes	2022-09-01	6117-02-01	21:55:00	1	female	https://NABU-naturgucker.de/?bild=-671444065
Rh-Pf	2022-09-01	6216-03-01		1		https://NABU-naturgucker.de/?bild=-1419170728
Hes	2022-09-01	6217-04-01		1	female	https://NABU-naturgucker.de/?bild=1058262076
Bay	2022-09-01	6225-02-01		1	male	https://NABU-naturgucker.de/?bild=451800239
Hes	2022-09-01	6316-04-01		2	male	https://NABU-naturgucker.de/?bild=-2095151552
Hes	2022-09-01	6317-04-01		1	female	https://NABU-naturgucker.de/?bild=478694610
Hes	2022-09-01	6416-02-01		1		https://NABU-naturgucker.de/?bild=1650184009
Rh-Pf	2022-09-01	6416-03-01		1		https://NABU-naturgucker.de/?bild=1941834028
Rh-Pf	2022-09-01	6416-03-01		1	male	https://NABU-naturgucker.de/?bild=-591509059
BaWü	2022-09-01	6417-02-01		2	male	https://NABU-naturgucker.de/?bild=-902877873
Hes	2022-09-01	6417-03-01		4	male	https://NABU-naturgucker.de/?bild=-609048632
Hes	2022-09-01	6417-03-01		1		https://NABU-naturgucker.de/?bild=1659818406
Hes	2022-09-01	6417-03-01		2		https://NABU-naturgucker.de/?bild=-1138378126
Hes	2022-09-01	6417-03-01		1	male	https://NABU-naturgucker.de/?bild=-1742008659
Hes	2022-09-01	6417-04-01		1	female	https://NABU-naturgucker.de/?bild=-319916825
BaWü	2022-09-01	6418-03-01		1	female	https://NABU-naturgucker.de/?bild=-668561437
Rh-Pf	2022-09-01	6514-02-01		1	male	https://NABU-naturgucker.de/?bild=-2090693872
Rh-Pf	2022-09-01	6515-03-01		1	female	https://NABU-naturgucker.de/?bild=-1466923726
Rh-Pf	2022-09-01	6515-04-01	18:00:00	1	male	https://NABU-naturgucker.de/?bild=-1684138923
Rh-Pf	2022-09-01	6516-01-01		1	male	https://NABU-naturgucker.de/?bild=-364224177
Rh-Pf	2022-09-01	6516-01-01		46	female	https://NABU-naturgucker.de/?bild=-592341416
Rh-Pf	2022-09-01	6516-01-01		1		https://NABU-naturgucker.de/?bild=240314851
BaWü	2022-09-01	6516-02-01		1		https://NABU-naturgucker.de/?bild=-1470147945
BaWü	2022-09-01	6516-02-01		1	female	https://NABU-naturgucker.de/?bild=-1034282567
BaWü	2022-09-01	6516-02-01		1	male	https://NABU-naturgucker.de/?bild=-2027043050
Rh-Pf	2022-09-01	6516-03-01	13:00:00	1		https://NABU-naturgucker.de/?bild=-231508065
Rh-Pf	2022-09-01	6516-03-01		35	female	https://NABU-naturgucker.de/?bild=1869388892
Rh-Pf	2022-09-01	6516-04-01		3	male	https://NABU-naturgucker.de/?bild=512048022
BaWü	2022-09-01	6517-01-01		1		https://NABU-naturgucker.de/?bild=1223917643
BaWü	2022-09-01	6517-01-01		1		https://NABU-naturgucker.de/?bild=512416122
BaWü	2022-09-01	6517-01-01		1	male	https://NABU-naturgucker.de/?bild=-1781963818
BaWü	2022-09-01	6517-02-01		3		https://NABU-naturgucker.de/?bild=-69770250
BaWü	2022-09-01	6517-02-01		1	female	https://NABU-naturgucker.de/?bild=1177776910
BaWü	2022-09-01	6517-02-01		1	male	https://NABU-naturgucker.de/?bild=-612435055
BaWü	2022-09-01	6517-02-01		1		https://NABU-naturgucker.de/?bild=-1249088367
BaWü	2022-09-01	6517-02-01		1		https://NABU-naturgucker.de/?bild=-2021830545
BaWü	2022-09-01	6517-03-01	21:12:00	1	female	https://NABU-naturgucker.de/?bild=-1442270327
BaWü	2022-09-01	6517-04-01		1	male	https://NABU-naturgucker.de/?bild=1121995272
BaWü	2022-09-01	6518-01-01		1	male	https://NABU-naturgucker.de/?bild=-41080612
BaWü	2022-09-01	6518-01-01		1		https://NABU-naturgucker.de/?bild=-1301598636
BaWü	2022-09-01	6518-01-01		1	female	https://NABU-naturgucker.de/?bild=-640802178
BaWü	2022-09-01	6518-03-01		1	male	https://NABU-naturgucker.de/?bild=-2062543045
BaWü	2022-09-01	6518-03-01		1		https://NABU-naturgucker.de/?bild=99267563
BaWü	2022-09-01	6518-03-01		1		https://NABU-naturgucker.de/?bild=1346446905
BaWü	2022-09-01	6518-03-01	19:00:00	1	male	https://NABU-naturgucker.de/?bild=-600483889
BaWü	2022-09-01	6518-03-01		3	female	https://NABU-naturgucker.de/?bild=1418135112
BaWü	2022-09-01	6518-03-01		10	female	https://NABU-naturgucker.de/?bild=-532005562
BaWü	2022-09-01	6518-03-01		1	female	https://NABU-naturgucker.de/?bild=1876183045
BaWü	2022-09-01	6518-04-01		1		https://NABU-naturgucker.de/?bild=2055190091
BaWü	2022-09-01	6518-04-01		1	female	https://NABU-naturgucker.de/?bild=1668615773
BaWü	2022-09-01	6518-04-01		1	female	https://NABU-naturgucker.de/?bild=-1643379705
BaWü	2022-09-01	6519-01-01		1		https://NABU-naturgucker.de/?bild=-1367502568
Rh-Pf	2022-09-01	6614-04-01		1	male	https://NABU-naturgucker.de/?bild=-1546317607
Rh-Pf	2022-09-01	6614-04-01		1	male	https://NABU-naturgucker.de/?bild=1750083253
Rh-Pf	2022-09-01	6615-02-01		1		https://NABU-naturgucker.de/?bild=300924012
Rh-Pf	2022-09-01	6616-03-01	22:00:00	1		https://NABU-naturgucker.de/?bild=-230371430
Rh-Pf	2022-09-01	6616-04-01		10	female	https://NABU-naturgucker.de/?bild=-1676402035
Rh-Pf	2022-09-01	6616-04-01		1	female	https://NABU-naturgucker.de/?bild=-1850112377
Rh-Pf	2022-09-01	6616-04-01		2		https://NABU-naturgucker.de/?bild=1848188163
Rh-Pf	2022-09-01	6616-04-01	01:30:00	1	male	https://NABU-naturgucker.de/?bild=1173750154
BaWü	2022-09-01	6617-01-01		1	male	https://NABU-naturgucker.de/?bild=1534501177
BaWü	2022-09-01	6617-01-01		1	female	https://NABU-naturgucker.de/?bild=-878930424
BaWü	2022-09-01	6617-01-01		1		https://NABU-naturgucker.de/?bild=-1058388676
BaWü	2022-09-01	6617-02-01		1	female	https://NABU-naturgucker.de/?bild=1993462661
BaWü	2022-09-01	6617-02-01		1	male	https://NABU-naturgucker.de/?bild=671354838
BaWü	2022-09-01	6617-02-01	20:30:00	1		https://NABU-naturgucker.de/?bild=239924011
BaWü	2022-09-01	6617-02-01	08:00:00	1	male	https://NABU-naturgucker.de/?bild=1031343181
BaWü	2022-09-01	6617-02-01	09:00:00	6		https://NABU-naturgucker.de/?bild=589060968
BaWü	2022-09-01	6618-01-01		1	female	https://NABU-naturgucker.de/?bild=-926110422
BaWü	2022-09-01	6618-01-01	16:40:00	1		https://NABU-naturgucker.de/?bild=1299885378
BaWü	2022-09-01	6618-01-01		1	female	https://NABU-naturgucker.de/?bild=298424688
BaWü	2022-09-01	6618-02-01		1		https://NABU-naturgucker.de/?bild=1092553970
BaWü	2022-09-01	6618-02-01	00:29:00	1	female	https://NABU-naturgucker.de/?bild=-121967040
Rh-Pf	2022-09-01	6714-04-01		1		https://NABU-naturgucker.de/?bild=-994816242
Rh-Pf	2022-09-01	6716-01-01		1	female	https://NABU-naturgucker.de/?bild=1799315555
BaWü	2022-09-01	6717-01-01		1	female	https://NABU-naturgucker.de/?bild=-720812340
BaWü	2022-09-01	6717-03-01	13:12:00	1	female	https://NABU-naturgucker.de/?bild=-1325749265
BaWü	2022-09-01	6717-03-01		3	female	https://NABU-naturgucker.de/?bild=-1221099061
BaWü	2022-09-01	6718-01-01		2	female	https://NABU-naturgucker.de/?bild=-269251742
BaWü	2022-09-01	6718-01-01		1		https://NABU-naturgucker.de/?bild=-1506532218
BaWü	2022-09-01	6718-03-01		1	male	https://NABU-naturgucker.de/?bild=1486867655
BaWü	2022-09-01	6718-03-01			female	https://NABU-naturgucker.de/?bild=-1956203517
BaWü	2022-09-01	6719-01-01		1		https://NABU-naturgucker.de/?bild=-2020747899
Rh-Pf	2022-09-01	6814-01-01		1	female	https://NABU-naturgucker.de/?bild=320497974
BaWü	2022-09-01	6816-02-01		1		https://NABU-naturgucker.de/?bild=-1323743910
BaWü	2022-09-01	6816-02-01		1		https://NABU-naturgucker.de/?bild=-137864455
Rh-Pf	2022-09-01	6816-03-01		1	female	https://NABU-naturgucker.de/?bild=1761707643
BaWü	2022-09-01	6816-04-01		1	female	https://NABU-naturgucker.de/?bild=875247215
BaWü	2022-09-01	6817-03-01		1	female	https://NABU-naturgucker.de/?bild=698217813
BaWü	2022-09-01	6820-02-01		1	female	https://NABU-naturgucker.de/?bild=57570212
BaWü	2022-09-01	6820-04-01		1	male	https://NABU-naturgucker.de/?bild=1655276082
BaWü	2022-09-01	6820-04-01	06:37:00	1	male	https://NABU-naturgucker.de/?bild=586481197
BaWü	2022-09-01	6820-04-01		1	female	https://NABU-naturgucker.de/?bild=1718073637
BaWü	2022-09-01	6821-03-01	21:00:00	1		https://NABU-naturgucker.de/?bild=-522264159
BaWü	2022-09-01	6821-03-01		1	male	https://NABU-naturgucker.de/?bild=1112974623
BaWü	2022-09-01	6821-03-01		1		https://NABU-naturgucker.de/?bild=618147302
BaWü	2022-09-01	6821-04-01		1		https://NABU-naturgucker.de/?bild=-1893341722
BaWü	2022-09-01	6824-03-01		1		https://NABU-naturgucker.de/?bild=885593351
Rh-Pf	2022-09-01	6914-01-01	21:00:00	1	male	https://NABU-naturgucker.de/?bild=-177215150
Rh-Pf	2022-09-01	6915-01-01		1	male	https://NABU-naturgucker.de/?bild=319661228
Rh-Pf	2022-09-01	6915-04-01		1	female	https://NABU-naturgucker.de/?bild=-987036814
Rh-Pf	2022-09-01	6915-04-01		1	male	https://NABU-naturgucker.de/?bild=1759693458
BaWü	2022-09-01	6916-01-01		1		https://NABU-naturgucker.de/?bild=1338867440
BaWü	2022-09-01	6916-01-01		3		https://NABU-naturgucker.de/?bild=374872726
BaWü	2022-09-01	6916-01-01		2		https://NABU-naturgucker.de/?bild=1496844903
BaWü	2022-09-01	6916-01-01		1	female	https://NABU-naturgucker.de/?bild=-2091305014
BaWü	2022-09-01	6916-02-01		3		https://NABU-naturgucker.de/?bild=-2051054209
BaWü	2022-09-01	6916-03-01		1	male	https://NABU-naturgucker.de/?bild=188108882
BaWü	2022-09-01	6916-03-01		8	female	https://NABU-naturgucker.de/?bild=298677215
BaWü	2022-09-01	6916-04-01		1	female	https://NABU-naturgucker.de/?bild=1235515262
BaWü	2022-09-01	6916-04-01		1		https://NABU-naturgucker.de/?bild=-4160132
BaWü	2022-09-01	6917-03-01		1	female	https://NABU-naturgucker.de/?bild=882901917
BaWü	2022-09-01	6917-03-01		1	female	https://NABU-naturgucker.de/?bild=-1636333513
BaWü	2022-09-01	6917-03-01		1	male	https://NABU-naturgucker.de/?bild=-1314599167
BaWü	2022-09-01	6917-03-01		6		https://NABU-naturgucker.de/?bild=1665557956
BaWü	2022-09-01	6918-01-01		1		https://NABU-naturgucker.de/?bild=1569436862
BaWü	2022-09-01	6918-03-01		1		https://NABU-naturgucker.de/?bild=233721077
BaWü	2022-09-01	6918-04-01		1	male	https://NABU-naturgucker.de/?bild=-2023949431
BaWü	2022-09-01	6921-01-01		1		https://NABU-naturgucker.de/?bild=2090525436
BaWü	2022-09-01	7015-03-01	08:00:00	1	male	https://NABU-naturgucker.de/?bild=454728047
BaWü	2022-09-01	7015-03-01		1	female	https://NABU-naturgucker.de/?bild=1983083681
BaWü	2022-09-01	7015-04-01		1		https://NABU-naturgucker.de/?bild=113201917
BaWü	2022-09-01	7016-01-01		1	female	https://NABU-naturgucker.de/?bild=590184763
BaWü	2022-09-01	7016-01-01		1		https://NABU-naturgucker.de/?bild=-816578398
BaWü	2022-09-01	7016-02-01		1	female	https://NABU-naturgucker.de/?bild=-386642742
BaWü	2022-09-01	7016-02-01		1	female	https://NABU-naturgucker.de/?bild=-1340747197
BaWü	2022-09-01	7016-03-01	10:29:00	1	female	https://NABU-naturgucker.de/?bild=685611465
BaWü	2022-09-01	7016-03-01	14:15:00	1	male	https://NABU-naturgucker.de/?bild=1639027627
BaWü	2022-09-01	7016-04-01		2		https://NABU-naturgucker.de/?bild=813870374
BaWü	2022-09-01	7017-02-01		1	female	https://NABU-naturgucker.de/?bild=1142320245
BaWü	2022-09-01	7017-03-01		2		https://NABU-naturgucker.de/?bild=-629342228
BaWü	2022-09-01	7019-02-01		2	female	https://NABU-naturgucker.de/?bild=-957719405
BaWü	2022-09-01	7020-02-01	00:20:00	1	female	https://NABU-naturgucker.de/?bild=213629843
BaWü	2022-09-01	7020-02-01		1	female	https://NABU-naturgucker.de/?bild=-1665729885
BaWü	2022-09-01	7020-04-01		1		https://NABU-naturgucker.de/?bild=-563133425
BaWü	2022-09-01	7021-03-01		2	female	https://NABU-naturgucker.de/?bild=557882676
BaWü	2022-09-01	7021-03-01		1		https://NABU-naturgucker.de/?bild=164270580
BaWü	2022-09-01	7021-04-01		1		https://NABU-naturgucker.de/?bild=-1486607098
BaWü	2022-09-01	7021-04-01		1		https://NABU-naturgucker.de/?bild=66608977
BaWü	2022-09-01	7114-04-01		1		https://NABU-naturgucker.de/?bild=-1960417403
BaWü	2022-09-01	7115-01-01		1	female	https://NABU-naturgucker.de/?bild=2099333838
BaWü	2022-09-01	7115-01-01	07:30:00	1	female	https://NABU-naturgucker.de/?bild=-286321376
BaWü	2022-09-01	7115-02-01	23:09:00	1		https://NABU-naturgucker.de/?bild=-2013199013
BaWü	2022-09-01	7118-01-01		2	male	https://NABU-naturgucker.de/?bild=-758841857
BaWü	2022-09-01	7120-02-01		1	male	https://NABU-naturgucker.de/?bild=288440102
BaWü	2022-09-01	7120-03-01		1		https://NABU-naturgucker.de/?bild=219393032
BaWü	2022-09-01	7120-03-01		1		https://NABU-naturgucker.de/?bild=1020820933
BaWü	2022-09-01	7120-04-01		2	female	https://NABU-naturgucker.de/?bild=1619089352
BaWü	2022-09-01	7121-01-01		1	male	https://NABU-naturgucker.de/?bild=-840687930
BaWü	2022-09-01	7121-01-01		1		https://NABU-naturgucker.de/?bild=-288638457
BaWü	2022-09-01	7121-01-01		1		https://NABU-naturgucker.de/?bild=-1916550339
BaWü	2022-09-01	7121-01-01		11	female	https://NABU-naturgucker.de/?bild=-698449853
BaWü	2022-09-01	7121-01-01		1		https://NABU-naturgucker.de/?bild=1794641501
BaWü	2022-09-01	7121-01-01		3		https://NABU-naturgucker.de/?bild=-732340325
BaWü	2022-09-01	7121-01-01		1	female	https://NABU-naturgucker.de/?bild=-226244533
BaWü	2022-09-01	7121-01-01		1	female	https://NABU-naturgucker.de/?bild=-1699846678
BaWü	2022-09-01	7121-01-01		1		https://NABU-naturgucker.de/?bild=192778402
BaWü	2022-09-01	7121-01-01		1	female	https://NABU-naturgucker.de/?bild=42780278
BaWü	2022-09-01	7121-02-01		1	female	https://NABU-naturgucker.de/?bild=2120372671
BaWü	2022-09-01	7121-03-01		1	male	https://NABU-naturgucker.de/?bild=-2010928406
BaWü	2022-09-01	7121-03-01		1	female	https://NABU-naturgucker.de/?bild=-1958590763
BaWü	2022-09-01	7121-03-01		1	male	https://NABU-naturgucker.de/?bild=623435384
BaWü	2022-09-01	7121-03-01		2		https://NABU-naturgucker.de/?bild=54224477
BaWü	2022-09-01	7121-03-01		1		https://NABU-naturgucker.de/?bild=-659632650
BaWü	2022-09-01	7121-04-01		1	female	https://NABU-naturgucker.de/?bild=-398407308
BaWü	2022-09-01	7121-04-01		1	female	https://NABU-naturgucker.de/?bild=1955529032
BaWü	2022-09-01	7121-04-01		1		https://NABU-naturgucker.de/?bild=1710830498
BaWü	2022-09-01	7121-04-01		1		https://NABU-naturgucker.de/?bild=-1790894961
BaWü	2022-09-01	7123-03-01	20:15:00	1		https://NABU-naturgucker.de/?bild=1881383309
BaWü	2022-09-01	7126-02-01		1	female	https://NABU-naturgucker.de/?bild=-2117800715
BaWü	2022-09-01	7214-04-01		1	male	https://NABU-naturgucker.de/?bild=-1237225026
BaWü	2022-09-01	7214-04-01		1		https://NABU-naturgucker.de/?bild=-1934770858
BaWü	2022-09-01	7214-04-01	23:00:00	1		https://NABU-naturgucker.de/?bild=315975411
BaWü	2022-09-01	7214-04-01		1	female	https://NABU-naturgucker.de/?bild=-543128391
BaWü	2022-09-01	7215-01-01		1		https://NABU-naturgucker.de/?bild=-1910984235
BaWü	2022-09-01	7215-03-01		1	female	https://NABU-naturgucker.de/?bild=-1526201909
BaWü	2022-09-01	7220-01-01		2		https://NABU-naturgucker.de/?bild=-1314786597
BaWü	2022-09-01	7220-02-01		1	male	https://NABU-naturgucker.de/?bild=-1465465948
BaWü	2022-09-01	7221-01-01		1	male	https://NABU-naturgucker.de/?bild=-576683705
BaWü	2022-09-01	7221-01-01		1		https://NABU-naturgucker.de/?bild=2119698737
BaWü	2022-09-01	7221-02-01		2	female	https://NABU-naturgucker.de/?bild=-1802825342
BaWü	2022-09-01	7221-02-01	22:00:00	1	male	https://NABU-naturgucker.de/?bild=-580458803
BaWü	2022-09-01	7221-02-01		3		https://NABU-naturgucker.de/?bild=-2128468184
BaWü	2022-09-01	7221-03-01		1	male	https://NABU-naturgucker.de/?bild=1120912550
BaWü	2022-09-01	7221-04-01		1		https://NABU-naturgucker.de/?bild=977666920
BaWü	2022-09-01	7222-01-01		1		https://NABU-naturgucker.de/?bild=1461505680
BaWü	2022-09-01	7222-03-01		1		https://NABU-naturgucker.de/?bild=-1590493775
BaWü	2022-09-01	7224-03-01		3	female	https://NABU-naturgucker.de/?bild=-1358327624
BaWü	2022-09-01	7224-03-01		1	male	https://NABU-naturgucker.de/?bild=-243327928
BaWü	2022-09-01	7224-03-01		1	female	https://NABU-naturgucker.de/?bild=-116734306
BaWü	2022-09-01	7314-01-01		1	male	https://NABU-naturgucker.de/?bild=-1486018627
BaWü	2022-09-01	7314-03-01		1		https://NABU-naturgucker.de/?bild=213068396
BaWü	2022-09-01	7314-04-01		4	female	https://NABU-naturgucker.de/?bild=1644178652
BaWü	2022-09-01	7315-01-01		1	male	https://NABU-naturgucker.de/?bild=1288701423
BaWü	2022-09-01	7320-02-01		1	female	https://NABU-naturgucker.de/?bild=-1920611419
BaWü	2022-09-01	7321-04-01		1	male	https://NABU-naturgucker.de/?bild=-222390065
BaWü	2022-09-01	7322-02-01		1	female	https://NABU-naturgucker.de/?bild=-516780705
BaWü	2022-09-01	7322-03-01		1		https://NABU-naturgucker.de/?bild=858385770
BaWü	2022-09-01	7323-04-01		1	male	https://NABU-naturgucker.de/?bild=322117978
BaWü	2022-09-01	7413-01-01		1	male	https://NABU-naturgucker.de/?bild=1324474908
BaWü	2022-09-01	7413-04-01		2	male	https://NABU-naturgucker.de/?bild=-915392635
BaWü	2022-09-01	7414-04-01		1	female	https://NABU-naturgucker.de/?bild=-387086359
BaWü	2022-09-01	7420-03-01		2		https://NABU-naturgucker.de/?bild=-688036017
BaWü	2022-09-01	7420-04-01		2	male	https://NABU-naturgucker.de/?bild=-1111371584
BaWü	2022-09-01	7512-02-01	11:15:00	1		https://NABU-naturgucker.de/?bild=-2115338786
BaWü	2022-09-01	7512-04-01		1		https://NABU-naturgucker.de/?bild=-33720722
BaWü	2022-09-01	7513-02-01		1	female	https://NABU-naturgucker.de/?bild=-1660928803
BaWü	2022-09-01	7513-02-01		1	female	https://NABU-naturgucker.de/?bild=-1563638481
BaWü	2022-09-01	7513-02-01		1		https://NABU-naturgucker.de/?bild=821928605
BaWü	2022-09-01	7513-02-01		4	male	https://NABU-naturgucker.de/?bild=1073964232
BaWü	2022-09-01	7513-04-01		1		https://NABU-naturgucker.de/?bild=1673239454
BaWü	2022-09-01	7514-03-01		1		https://NABU-naturgucker.de/?bild=-1462985188
BaWü	2022-09-01	7518-01-01		1		https://NABU-naturgucker.de/?bild=1136416705
BaWü	2022-09-01	7519-02-01		1		https://NABU-naturgucker.de/?bild=1742786939
BaWü	2022-09-01	7520-03-01		3	male	https://NABU-naturgucker.de/?bild=-932438863
BaWü	2022-09-01	7520-03-01		1	male	https://NABU-naturgucker.de/?bild=1693116142
BaWü	2022-09-01	7612-02-01		3	female	https://NABU-naturgucker.de/?bild=-1445942387
BaWü	2022-09-01	7613-01-01		1		https://NABU-naturgucker.de/?bild=-1208208504
BaWü	2022-09-01	7613-03-01		1	male	https://NABU-naturgucker.de/?bild=2105636140
BaWü	2022-09-01	7613-03-01		1		https://NABU-naturgucker.de/?bild=-418373732
BaWü	2022-09-01	7613-04-01		7		https://NABU-naturgucker.de/?bild=-1434747958
Bay	2022-09-01	7626-01-01		1	female	https://NABU-naturgucker.de/?bild=-1119909973
BaWü	2022-09-01	7713-02-01		4		https://NABU-naturgucker.de/?bild=1575526156
BaWü	2022-09-01	7812-01-01		1	male	https://NABU-naturgucker.de/?bild=-1623025689
BaWü	2022-09-01	7812-02-01		1	female	https://NABU-naturgucker.de/?bild=-1505098092
BaWü	2022-09-01	7812-03-01		1	female	https://NABU-naturgucker.de/?bild=-444198833
BaWü	2022-09-01	7812-04-01		2		https://NABU-naturgucker.de/?bild=-867907988
BaWü	2022-09-01	7812-04-01		1		https://NABU-naturgucker.de/?bild=-1891522516
BaWü	2022-09-01	7813-03-01		1	female	https://NABU-naturgucker.de/?bild=898711416
BaWü	2022-09-01	7814-03-01		1	male	https://NABU-naturgucker.de/?bild=-1983216227
Bay	2022-09-01	7834-03-01		5	female	https://NABU-naturgucker.de/?bild=338839701
Bay	2022-09-01	7835-04-01	17:00:00	1	male	https://NABU-naturgucker.de/?bild=1466094804
BaWü	2022-09-01	7911-04-01		1	female	https://NABU-naturgucker.de/?bild=-1790551708
BaWü	2022-09-01	7912-01-01		1	female	https://NABU-naturgucker.de/?bild=1872307751
BaWü	2022-09-01	7912-02-01		1		https://NABU-naturgucker.de/?bild=-2018493998
BaWü	2022-09-01	7912-04-01		1		https://NABU-naturgucker.de/?bild=1333547690
BaWü	2022-09-01	7912-04-01		1	male	https://NABU-naturgucker.de/?bild=15389422
BaWü	2022-09-01	7913-01-01		1	female	https://NABU-naturgucker.de/?bild=-537815944
BaWü	2022-09-01	7913-01-01				https://NABU-naturgucker.de/?bild=-296652717
BaWü	2022-09-01	7913-01-01		1	male	https://NABU-naturgucker.de/?bild=-438579352
BaWü	2022-09-01	7913-02-01		1	female	https://NABU-naturgucker.de/?bild=1302638668
BaWü	2022-09-01	7913-03-01		1	female	https://NABU-naturgucker.de/?bild=161381163
BaWü	2022-09-01	7913-03-01		3		https://NABU-naturgucker.de/?bild=-1513814242
BaWü	2022-09-01	7913-03-01		1	female	https://NABU-naturgucker.de/?bild=-1144578720
BaWü	2022-09-01	7913-03-01		1		https://NABU-naturgucker.de/?bild=-1398375320
BaWü	2022-09-01	7913-03-01		1		https://NABU-naturgucker.de/?bild=-2113419452
BaWü	2022-09-01	7913-03-01		1		https://NABU-naturgucker.de/?bild=-1196441634
BaWü	2022-09-01	8011-02-01		7		https://NABU-naturgucker.de/?bild=-1012595983
BaWü	2022-09-01	8011-02-01		1	male	https://NABU-naturgucker.de/?bild=-237020421
BaWü	2022-09-01	8012-02-01	20:56:00	1	female	https://NABU-naturgucker.de/?bild=-1868809048
BaWü	2022-09-01	8012-02-01	22.24	1	male	https://NABU-naturgucker.de/?bild=-775079378
BaWü	2022-09-01	8012-02-01		2	female	https://NABU-naturgucker.de/?bild=-1748669734
BaWü	2022-09-01	8012-02-01		1	male	https://NABU-naturgucker.de/?bild=-1003939333
BaWü	2022-09-01	8012-02-01	07:55:00	1	female	https://NABU-naturgucker.de/?bild=1886505297
BaWü	2022-09-01	8012-02-01		2	female	https://NABU-naturgucker.de/?bild=-809247073
BaWü	2022-09-01	8012-03-01		2	male	https://NABU-naturgucker.de/?bild=797978853
BaWü	2022-09-01	8012-03-01		1	male	https://NABU-naturgucker.de/?bild=-2142290657
BaWü	2022-09-01	8012-03-01		1		https://NABU-naturgucker.de/?bild=-1166990738
BaWü	2022-09-01	8013-01-01		2	female	https://NABU-naturgucker.de/?bild=623444
BaWü	2022-09-01	8013-01-01		2	male	https://NABU-naturgucker.de/?bild=-1754624698
BaWü	2022-09-01	8013-01-01		1	male	https://NABU-naturgucker.de/?bild=-1234689000
BaWü	2022-09-01	8013-01-01		1	male	https://NABU-naturgucker.de/?bild=713869259
BaWü	2022-09-01	8013-01-01		1		https://NABU-naturgucker.de/?bild=1851251133
BaWü	2022-09-01	8111-02-01		5	male	https://NABU-naturgucker.de/?bild=-1018566040
BaWü	2022-09-01	8111-02-01		1	male	https://NABU-naturgucker.de/?bild=-839526047
BaWü	2022-09-01	8111-04-01		1	female	https://NABU-naturgucker.de/?bild=19015777
BaWü	2022-09-01	8111-04-01		1		https://NABU-naturgucker.de/?bild=-399821575
BaWü	2022-09-01	8112-01-01	19:45:00	1		https://NABU-naturgucker.de/?bild=-864682646
BaWü	2022-09-01	8112-03-01		3	male	https://NABU-naturgucker.de/?bild=-1321165074
BaWü	2022-09-01	8211-04-01		1	female	https://NABU-naturgucker.de/?bild=616255871
BaWü	2022-09-01	8218-02-01		1		https://NABU-naturgucker.de/?bild=57498701
BaWü	2022-09-01	8218-02-01		1		https://NABU-naturgucker.de/?bild=-1592463957
BaWü	2022-09-01	8219-02-01		1		https://NABU-naturgucker.de/?bild=-769839028
BaWü	2022-09-01	8219-03-01		1	female	https://NABU-naturgucker.de/?bild=-1324103787
BaWü	2022-09-01	8219-03-01		2		https://NABU-naturgucker.de/?bild=-1881117184
BaWü	2022-09-01	8221-04-01		1		https://NABU-naturgucker.de/?bild=-736695311
BaWü	2022-09-01	8223-02-01		1	female	https://NABU-naturgucker.de/?bild=-1094636718
BaWü	2022-09-01	8311-01-01		1		https://NABU-naturgucker.de/?bild=-1294420757
BaWü	2022-09-01	8311-04-01		1	male	https://NABU-naturgucker.de/?bild=-679953271
BaWü	2022-09-01	8312-03-01		2		https://NABU-naturgucker.de/?bild=-1913221270
BaWü	2022-09-01	8313-03-01		1	female	https://NABU-naturgucker.de/?bild=-1749639620
BaWü	2022-09-01	8320-02-01		1		https://NABU-naturgucker.de/?bild=-1781370855
BaWü	2022-09-01	8321-01-01		1	male	https://NABU-naturgucker.de/?bild=776893994
BaWü	2022-09-01	8322-02-01		2		https://NABU-naturgucker.de/?bild=-709443479
BaWü	2022-09-01	8412-02-01		1	female	https://NABU-naturgucker.de/?bild=-1949892894
BaWü	2022-09-01	8412-02-01		1	male	https://NABU-naturgucker.de/?bild=-801766637
BaWü	2022-09-01	6917-01-01		1	male	https://NABU-naturgucker.de/?bild=-1478151283
BaWü	2022-09-02	6518-01-01	21:30:00	1	male	https://NABU-naturgucker.de/?bild=-227365627
BaWü	2022-09-02	6517-02-01	21:53:00	4		https://NABU-naturgucker.de/?bild=-932781963
Rh-Pf	2022-09-02	6516-01-01	21:24:00	1		https://NABU-naturgucker.de/?bild=1434448474
BaWü	2022-09-02	6916-03-01	08:16:00	3		https://NABU-naturgucker.de/?bild=1067563986
BB	2022-09-02	3546-02-01		3	female	https://NABU-naturgucker.de/?bild=-1055348043
NRW	2022-09-02	4203-04-01		1	female	https://NABU-naturgucker.de/?bild=-1398166942
NRW	2022-09-02	4311-04-01		1	male	https://NABU-naturgucker.de/?bild=1839684852
NRW	2022-09-02	4312-01-01		1	female	https://NABU-naturgucker.de/?bild=574418070
NRW	2022-09-02	4408-04-01	22:20:00	1	male	https://NABU-naturgucker.de/?bild=-1408122915
NRW	2022-09-02	4409-04-01		1		https://NABU-naturgucker.de/?bild=-1330998089
NRW	2022-09-02	4503-02-01		1	female	https://NABU-naturgucker.de/?bild=1694422571
NRW	2022-09-02	4604-02-01		1		https://NABU-naturgucker.de/?bild=1708605768
NRW	2022-09-02	4604-02-01		1	female	https://NABU-naturgucker.de/?bild=-903461831
NRW	2022-09-02	4705-02-01		1		https://NABU-naturgucker.de/?bild=989078005
NRW	2022-09-02	4705-04-01		1	female	https://NABU-naturgucker.de/?bild=-1449432609
NRW	2022-09-02	4804-02-01		1	female	https://NABU-naturgucker.de/?bild=-1238327701
NRW	2022-09-02	4804-02-01		1		https://NABU-naturgucker.de/?bild=218103284
NRW	2022-09-02	4804-02-01		1	female	https://NABU-naturgucker.de/?bild=-433589372
NRW	2022-09-02	4805-01-01		1	male	https://NABU-naturgucker.de/?bild=627494325
NRW	2022-09-02	4806-01-01		1	male	https://NABU-naturgucker.de/?bild=911192245
NRW	2022-09-02	4809-03-01		1		https://NABU-naturgucker.de/?bild=-1753064825
NRW	2022-09-02	4905-04-01		1	female	https://NABU-naturgucker.de/?bild=1301647100
NRW	2022-09-02	4907-02-01		1	female	https://NABU-naturgucker.de/?bild=159157121
NRW	2022-09-02	4908-03-01		1	male	https://NABU-naturgucker.de/?bild=-1304996915
NRW	2022-09-02	5006-04-01		1	male	https://NABU-naturgucker.de/?bild=-1483978599
NRW	2022-09-02	5007-01-01		1	male	https://NABU-naturgucker.de/?bild=238569549
NRW	2022-09-02	5007-02-01		1	male	https://NABU-naturgucker.de/?bild=-1885341310
NRW	2022-09-02	5007-04-01	15:00:00	1	female	https://NABU-naturgucker.de/?bild=-1567897450
NRW	2022-09-02	5008-01-01		2		https://NABU-naturgucker.de/?bild=-357011313
NRW	2022-09-02	5008-03-01		1		https://NABU-naturgucker.de/?bild=1726694433
NRW	2022-09-02	5108-03-01		1	male	https://NABU-naturgucker.de/?bild=-1968246470
NRW	2022-09-02	5208-03-01		1	male	https://NABU-naturgucker.de/?bild=1861743623
NRW	2022-09-02	5208-04-01		1	female	https://NABU-naturgucker.de/?bild=-1436422212
Thür	2022-09-02	5230-03-01		3	male	https://NABU-naturgucker.de/?bild=1315033393
Rh-Pf	2022-09-02	5610-02-01		1	female	https://NABU-naturgucker.de/?bild=965215764
Hes	2022-09-02	5717-02-01		2	male	https://NABU-naturgucker.de/?bild=-662790268
Hes	2022-09-02	5717-03-01		4	female	https://NABU-naturgucker.de/?bild=1176939092
Hes	2022-09-02	5718-01-01		1	female	https://NABU-naturgucker.de/?bild=-939313550
Hes	2022-09-02	5718-04-01		1	female	https://NABU-naturgucker.de/?bild=-2068143199
Hes	2022-09-02	5720-04-01		1	female	https://NABU-naturgucker.de/?bild=-408986410
Rh-Pf	2022-09-02	5809-03-01		1		https://NABU-naturgucker.de/?bild=-652234227
Hes	2022-09-02	5816-04-01		1	female	https://NABU-naturgucker.de/?bild=1346563928
Hes	2022-09-02	5817-01-01		1	male	https://NABU-naturgucker.de/?bild=-1870476821
Hes	2022-09-02	5817-02-01	22:31:00	2	male	https://NABU-naturgucker.de/?bild=-1024843031
Hes	2022-09-02	5817-03-01		5	female	https://NABU-naturgucker.de/?bild=-705928120
Hes	2022-09-02	5817-03-01		1	male	https://NABU-naturgucker.de/?bild=959061313
Hes	2022-09-02	5817-04-01		1	female	https://NABU-naturgucker.de/?bild=-87031162
Hes	2022-09-02	5818-03-01		1	female	https://NABU-naturgucker.de/?bild=128126317
Hes	2022-09-02	5818-03-01		1	female	https://NABU-naturgucker.de/?bild=35024523
Hes	2022-09-02	5818-03-01	21:05:00	1	male	https://NABU-naturgucker.de/?bild=-660367093
Hes	2022-09-02	5819-03-01		1		https://NABU-naturgucker.de/?bild=1492890928
Hes	2022-09-02	5915-01-01		1		https://NABU-naturgucker.de/?bild=-1265771191
Rh-Pf	2022-09-02	5915-03-01	10:00:00	1	male	https://NABU-naturgucker.de/?bild=-1529814236
Rh-Pf	2022-09-02	5915-03-01	20:45:00	1	female	https://NABU-naturgucker.de/?bild=-442067657
Hes	2022-09-02	5916-01-01		1	male	https://NABU-naturgucker.de/?bild=-759001545
Hes	2022-09-02	5916-04-01		1	male	https://NABU-naturgucker.de/?bild=1456130538
Hes	2022-09-02	5918-03-01		1	female	https://NABU-naturgucker.de/?bild=-2080875502
Hes	2022-09-02	5919-03-01		10	female	https://NABU-naturgucker.de/?bild=-1698161286
Rh-Pf	2022-09-02	6014-01-01		1	female	https://NABU-naturgucker.de/?bild=-2115440522
Rh-Pf	2022-09-02	6014-01-01		3	male	https://NABU-naturgucker.de/?bild=167861325
Rh-Pf	2022-09-02	6015-01-01		4		https://NABU-naturgucker.de/?bild=-1925047968
Rh-Pf	2022-09-02	6015-01-01		1		https://NABU-naturgucker.de/?bild=-2146390861
Rh-Pf	2022-09-02	6015-02-01		1	female	https://NABU-naturgucker.de/?bild=-1974437161
Rh-Pf	2022-09-02	6015-02-01	22:30:00	1	male	https://NABU-naturgucker.de/?bild=-1538009621
Hes	2022-09-02	6016-01-01		1		https://NABU-naturgucker.de/?bild=1873031360
Hes	2022-09-02	6016-01-01		1		https://NABU-naturgucker.de/?bild=-1210568132
Hes	2022-09-02	6016-01-01		1		https://NABU-naturgucker.de/?bild=-1130081783
Hes	2022-09-02	6016-03-01		1	female	https://NABU-naturgucker.de/?bild=147829858
Hes	2022-09-02	6016-04-01		1		https://NABU-naturgucker.de/?bild=535119794
Hes	2022-09-02	6017-02-01		1	female	https://NABU-naturgucker.de/?bild=461042239
Hes	2022-09-02	6017-04-01		1	male	https://NABU-naturgucker.de/?bild=-986176491
Hes	2022-09-02	6017-04-01		1	female	https://NABU-naturgucker.de/?bild=-316559926
Hes	2022-09-02	6018-01-01		1	female	https://NABU-naturgucker.de/?bild=-542580240
Hes	2022-09-02	6018-03-01		1	female	https://NABU-naturgucker.de/?bild=2000128119
Hes	2022-09-02	6018-03-01		4	female	https://NABU-naturgucker.de/?bild=-621148265
Hes	2022-09-02	6018-03-01		1		https://NABU-naturgucker.de/?bild=1997741634
Hes	2022-09-02	6018-03-01		1		https://NABU-naturgucker.de/?bild=596802526
Hes	2022-09-02	6018-03-01		1		https://NABU-naturgucker.de/?bild=253696077
Hes	2022-09-02	6018-03-01		1		https://NABU-naturgucker.de/?bild=523465703
Bay	2022-09-02	6020-02-01		1	male	https://NABU-naturgucker.de/?bild=-1763793356
Rh-Pf	2022-09-02	6114-02-01		1		https://NABU-naturgucker.de/?bild=-499411119
Rh-Pf	2022-09-02	6115-02-01		1		https://NABU-naturgucker.de/?bild=150644950
Hes	2022-09-02	6117-01-01		1	female	https://NABU-naturgucker.de/?bild=1444315180
Hes	2022-09-02	6117-02-01		1	male	https://NABU-naturgucker.de/?bild=1615245138
Rh-Pf	2022-09-02	6215-03-01		1		https://NABU-naturgucker.de/?bild=1223851430
Hes	2022-09-02	6217-04-01		1		https://NABU-naturgucker.de/?bild=-737822357
Hes	2022-09-02	6219-01-01		1		https://NABU-naturgucker.de/?bild=-1819614028
Rh-Pf	2022-09-02	6315-01-01		1	female	https://NABU-naturgucker.de/?bild=-1613477641
Rh-Pf	2022-09-02	6315-04-01		1		https://NABU-naturgucker.de/?bild=811216592
Hes	2022-09-02	6316-01-01		1	male	https://NABU-naturgucker.de/?bild=-518596582
Hes	2022-09-02	6316-01-01		3	female	https://NABU-naturgucker.de/?bild=-1969139165
Hes	2022-09-02	6317-04-01		4	female	https://NABU-naturgucker.de/?bild=864426783
Hes	2022-09-02	6317-04-01	20:00:00	1	male	https://NABU-naturgucker.de/?bild=-112922565
Rh-Pf	2022-09-02	6415-01-01		1	male	https://NABU-naturgucker.de/?bild=694956100
Rh-Pf	2022-09-02	6415-02-01		1	male	https://NABU-naturgucker.de/?bild=-1786299277
Rh-Pf	2022-09-02	6416-01-01		2		https://NABU-naturgucker.de/?bild=-1747165246
Rh-Pf	2022-09-02	6416-03-01		1		https://NABU-naturgucker.de/?bild=-1630653694
Rh-Pf	2022-09-02	6416-03-01		1	male	https://NABU-naturgucker.de/?bild=-913846985
BaWü	2022-09-02	6416-04-01		1	female	https://NABU-naturgucker.de/?bild=-1104064802
BaWü	2022-09-02	6416-04-01		1	male	https://NABU-naturgucker.de/?bild=2100554642
BaWü	2022-09-02	6417-02-01		1	female	https://NABU-naturgucker.de/?bild=1514037467
Hes	2022-09-02	6417-03-01		1	female	https://NABU-naturgucker.de/?bild=299343510
Hes	2022-09-02	6417-03-01		1	female	https://NABU-naturgucker.de/?bild=-1827559579
Hes	2022-09-02	6417-04-01		1	female	https://NABU-naturgucker.de/?bild=870496277
Hes	2022-09-02	6417-04-01		1		https://NABU-naturgucker.de/?bild=-965905822
Hes	2022-09-02	6417-04-01		1	female	https://NABU-naturgucker.de/?bild=-1398712579
Hes	2022-09-02	6417-04-01		5	female	https://NABU-naturgucker.de/?bild=-1985433781
Hes	2022-09-02	6417-04-01		1	male	https://NABU-naturgucker.de/?bild=1798174725
Rh-Pf	2022-09-02	6515-04-01		1	male	https://NABU-naturgucker.de/?bild=-1492933453
Rh-Pf	2022-09-02	6516-01-01		1	male	https://NABU-naturgucker.de/?bild=-143343001
Rh-Pf	2022-09-02	6516-01-01		1		https://NABU-naturgucker.de/?bild=356148613
BaWü	2022-09-02	6516-02-01		1	female	https://NABU-naturgucker.de/?bild=-211859852
BaWü	2022-09-02	6516-02-01		1		https://NABU-naturgucker.de/?bild=-1887208525
BaWü	2022-09-02	6516-02-01		1		https://NABU-naturgucker.de/?bild=-1221039661
BaWü	2022-09-02	6517-01-01		1	female	https://NABU-naturgucker.de/?bild=-1766768017
BaWü	2022-09-02	6517-02-01		1	female	https://NABU-naturgucker.de/?bild=767484982
BaWü	2022-09-02	6517-02-01		1		https://NABU-naturgucker.de/?bild=530208547
BaWü	2022-09-02	6517-02-01		1		https://NABU-naturgucker.de/?bild=-721887711
BaWü	2022-09-02	6517-02-01		1	female	https://NABU-naturgucker.de/?bild=125377129
BaWü	2022-09-02	6517-02-01	22:18:00	2		https://NABU-naturgucker.de/?bild=1951650704
BaWü	2022-09-02	6517-03-01	22:35:00	1		https://NABU-naturgucker.de/?bild=1602575306
BaWü	2022-09-02	6517-03-01	22:14:00	2		https://NABU-naturgucker.de/?bild=-42497528
BaWü	2022-09-02	6517-04-01		1	male	https://NABU-naturgucker.de/?bild=919565348
BaWü	2022-09-02	6517-04-01		1		https://NABU-naturgucker.de/?bild=1541088696
BaWü	2022-09-02	6518-03-01		1	male	https://NABU-naturgucker.de/?bild=1391851603
BaWü	2022-09-02	6518-03-01		1		https://NABU-naturgucker.de/?bild=-352077900
BaWü	2022-09-02	6518-04-01		15		https://NABU-naturgucker.de/?bild=950510265
Rh-Pf	2022-09-02	6614-02-01		1		https://NABU-naturgucker.de/?bild=1722299414
Rh-Pf	2022-09-02	6616-02-01	23:30:00	2	male	https://NABU-naturgucker.de/?bild=323422937
Rh-Pf	2022-09-02	6616-02-01		1	male	https://NABU-naturgucker.de/?bild=-2007818211
Rh-Pf	2022-09-02	6616-04-01		1	male	https://NABU-naturgucker.de/?bild=-1872080019
Rh-Pf	2022-09-02	6616-04-01		5	male	https://NABU-naturgucker.de/?bild=410068980
Rh-Pf	2022-09-02	6616-04-01		1		https://NABU-naturgucker.de/?bild=-2096979906
BaWü	2022-09-02	6617-01-01		1	male	https://NABU-naturgucker.de/?bild=1053353551
BaWü	2022-09-02	6617-01-01		1		https://NABU-naturgucker.de/?bild=1994643704
BaWü	2022-09-02	6617-01-01		1	female	https://NABU-naturgucker.de/?bild=-1642548769
BaWü	2022-09-02	6617-02-01	22:45:00	1	female	https://NABU-naturgucker.de/?bild=958856581
BaWü	2022-09-02	6617-03-01		1		https://NABU-naturgucker.de/?bild=-1631569480
BaWü	2022-09-02	6617-04-01	07:46:00	1		https://NABU-naturgucker.de/?bild=1095976404
BaWü	2022-09-02	6618-01-01		1	male	https://NABU-naturgucker.de/?bild=337864482
BaWü	2022-09-02	6618-03-01		1		https://NABU-naturgucker.de/?bild=1366189326
BaWü	2022-09-02	6618-03-01		1	male	https://NABU-naturgucker.de/?bild=1399554212
BaWü	2022-09-02	6618-03-01		1	male	https://NABU-naturgucker.de/?bild=230824422
BaWü	2022-09-02	6618-03-01		1	male	https://NABU-naturgucker.de/?bild=-1027774048
BaWü	2022-09-02	6618-04-01		1	male	https://NABU-naturgucker.de/?bild=562143
Rh-Pf	2022-09-02	6714-02-01		1		https://NABU-naturgucker.de/?bild=1636643124
BaWü	2022-09-02	6717-02-01		2	female	https://NABU-naturgucker.de/?bild=996168805
BaWü	2022-09-02	6717-04-01	15:59:00	2		https://NABU-naturgucker.de/?bild=1530196134
BaWü	2022-09-02	6717-04-01		1		https://NABU-naturgucker.de/?bild=375599437
BaWü	2022-09-02	6718-01-01	21:15:00	1	female	https://NABU-naturgucker.de/?bild=-343282640
BaWü	2022-09-02	6718-01-01		1	male	https://NABU-naturgucker.de/?bild=1486101448
BaWü	2022-09-02	6718-01-01		3	male	https://NABU-naturgucker.de/?bild=279446543
BaWü	2022-09-02	6718-03-01		1		https://NABU-naturgucker.de/?bild=1554255173
BaWü	2022-09-02	6719-01-01		1		https://NABU-naturgucker.de/?bild=-1796096994
BaWü	2022-09-02	6721-01-01		1	female	https://NABU-naturgucker.de/?bild=-1281734263
Saar	2022-09-02	6808-01-01		20	female	https://NABU-naturgucker.de/?bild=244060458
Rh-Pf	2022-09-02	6815-02-01		1		https://NABU-naturgucker.de/?bild=-77000599
BaWü	2022-09-02	6816-02-01		1		https://NABU-naturgucker.de/?bild=257368808
BaWü	2022-09-02	6817-01-01		1	male	https://NABU-naturgucker.de/?bild=-1882775868
BaWü	2022-09-02	6817-01-01		1	male	https://NABU-naturgucker.de/?bild=222935727
BaWü	2022-09-02	6820-02-01		1	female	https://NABU-naturgucker.de/?bild=-231094475
BaWü	2022-09-02	6820-02-01		1	male	https://NABU-naturgucker.de/?bild=662751663
BaWü	2022-09-02	6821-01-01		2	male	https://NABU-naturgucker.de/?bild=-1567291581
Rh-Pf	2022-09-02	6915-04-01		1	male	https://NABU-naturgucker.de/?bild=-173789216
Rh-Pf	2022-09-02	6915-04-01		1		https://NABU-naturgucker.de/?bild=-1327971100
BaWü	2022-09-02	6916-01-01	08:56:00	1	female	https://NABU-naturgucker.de/?bild=961082563
BaWü	2022-09-02	6916-01-01		1	female	https://NABU-naturgucker.de/?bild=-1448623964
BaWü	2022-09-02	6916-03-01		1		https://NABU-naturgucker.de/?bild=599745255
BaWü	2022-09-02	6916-03-01		1		https://NABU-naturgucker.de/?bild=-2077078590
BaWü	2022-09-02	6916-03-01		1	male	https://NABU-naturgucker.de/?bild=1270220280
BaWü	2022-09-02	6916-03-01		1		https://NABU-naturgucker.de/?bild=1528583955
BaWü	2022-09-02	6916-03-01		2	female	https://NABU-naturgucker.de/?bild=-1704720638
BaWü	2022-09-02	6916-03-01		1	female	https://NABU-naturgucker.de/?bild=-678819855
BaWü	2022-09-02	6916-03-01	10:55:00	1	female	https://NABU-naturgucker.de/?bild=-162417343
BaWü	2022-09-02	6916-03-01		1		https://NABU-naturgucker.de/?bild=-2067332268
BaWü	2022-09-02	6916-04-01		2		https://NABU-naturgucker.de/?bild=-2025233484
BaWü	2022-09-02	6916-04-01		1		https://NABU-naturgucker.de/?bild=-2025233484
BaWü	2022-09-02	6920-01-01		1	female	https://NABU-naturgucker.de/?bild=-663343036
BaWü	2022-09-02	6920-04-01		1	female	https://NABU-naturgucker.de/?bild=-1154926228
BaWü	2022-09-02	6920-04-01		1	male	https://NABU-naturgucker.de/?bild=-981553745
Rh-Pf	2022-09-02	7015-01-01		2		https://NABU-naturgucker.de/?bild=1131491287
Rh-Pf	2022-09-02	7015-01-01		1	female	https://NABU-naturgucker.de/?bild=-501840498
BaWü	2022-09-02	7015-02-01	20:35:00	1		https://NABU-naturgucker.de/?bild=-1869947799
BaWü	2022-09-02	7015-04-01		1	male	https://NABU-naturgucker.de/?bild=1591576767
BaWü	2022-09-02	7015-04-01		1	female	https://NABU-naturgucker.de/?bild=56937120
BaWü	2022-09-02	7015-04-01		1		https://NABU-naturgucker.de/?bild=1513483004
BaWü	2022-09-02	7016-01-01	22:38:00	1		https://NABU-naturgucker.de/?bild=476539362
BaWü	2022-09-02	7016-01-01		1		https://NABU-naturgucker.de/?bild=768495580
BaWü	2022-09-02	7016-02-01		1	female	https://NABU-naturgucker.de/?bild=-1173312635
BaWü	2022-09-02	7016-02-01		1	female	https://NABU-naturgucker.de/?bild=-2121110979
BaWü	2022-09-02	7016-03-01		1		https://NABU-naturgucker.de/?bild=-1542170242
BaWü	2022-09-02	7016-04-01		1		https://NABU-naturgucker.de/?bild=1952140100
BaWü	2022-09-02	7017-01-01		1	female	https://NABU-naturgucker.de/?bild=1379688546
BaWü	2022-09-02	7017-03-01		1		https://NABU-naturgucker.de/?bild=-1502437922
BaWü	2022-09-02	7017-03-01		1		https://NABU-naturgucker.de/?bild=-1801913065
BaWü	2022-09-02	7020-03-01		1	male	https://NABU-naturgucker.de/?bild=1150359376
BaWü	2022-09-02	7020-04-01		1	male	https://NABU-naturgucker.de/?bild=129936213
BaWü	2022-09-02	7020-04-01		2		https://NABU-naturgucker.de/?bild=-270006689
BaWü	2022-09-02	7020-04-01	05:31:00	1	male	https://NABU-naturgucker.de/?bild=-371333718
BaWü	2022-09-02	7020-04-01		1		https://NABU-naturgucker.de/?bild=41721373
BaWü	2022-09-02	7021-02-01		1		https://NABU-naturgucker.de/?bild=-1051659461
BaWü	2022-09-02	7021-04-01	22:36:00	1		https://NABU-naturgucker.de/?bild=235114254
BaWü	2022-09-02	7115-02-01		1	female	https://NABU-naturgucker.de/?bild=24522915
BaWü	2022-09-02	7115-04-01		2	female	https://NABU-naturgucker.de/?bild=-1011126425
BaWü	2022-09-02	7115-04-01		1	female	https://NABU-naturgucker.de/?bild=1360643769
BaWü	2022-09-02	7115-04-01		4		https://NABU-naturgucker.de/?bild=-682906898
BaWü	2022-09-02	7116-01-01	16:00:00	1		https://NABU-naturgucker.de/?bild=784215193
BaWü	2022-09-02	7118-01-01		1	female	https://NABU-naturgucker.de/?bild=-1625326956
BaWü	2022-09-02	7120-02-01		1	female	https://NABU-naturgucker.de/?bild=1038339716
BaWü	2022-09-02	7120-03-01		1	male	https://NABU-naturgucker.de/?bild=-1943154582
BaWü	2022-09-02	7120-04-01		3	female	https://NABU-naturgucker.de/?bild=1632748680
BaWü	2022-09-02	7121-01-01		1		https://NABU-naturgucker.de/?bild=30481898
BaWü	2022-09-02	7121-01-01		1	female	https://NABU-naturgucker.de/?bild=-920746228
BaWü	2022-09-02	7121-01-01		1		https://NABU-naturgucker.de/?bild=1969890308
BaWü	2022-09-02	7121-01-01		1	female	https://NABU-naturgucker.de/?bild=523612471
BaWü	2022-09-02	7121-01-01		1		https://NABU-naturgucker.de/?bild=-1047429926
BaWü	2022-09-02	7121-01-01		1	male	https://NABU-naturgucker.de/?bild=1364790559
BaWü	2022-09-02	7121-02-01		1	male	https://NABU-naturgucker.de/?bild=-1459996173
BaWü	2022-09-02	7121-02-01		2	male	https://NABU-naturgucker.de/?bild=-1905670786
BaWü	2022-09-02	7121-03-01	22:50:00	1	female	https://NABU-naturgucker.de/?bild=-317321374
BaWü	2022-09-02	7121-03-01		1	male	https://NABU-naturgucker.de/?bild=-1448091931
BaWü	2022-09-02	7121-03-01		1	male	https://NABU-naturgucker.de/?bild=-1176055991
BaWü	2022-09-02	7121-03-01		1	female	https://NABU-naturgucker.de/?bild=998777618
BaWü	2022-09-02	7121-03-01		1		https://NABU-naturgucker.de/?bild=84131674
BaWü	2022-09-02	7121-04-01		1	male	https://NABU-naturgucker.de/?bild=466123210
BaWü	2022-09-02	7122-01-01		1	male	https://NABU-naturgucker.de/?bild=-1266700817
BaWü	2022-09-02	7214-02-01		1	female	https://NABU-naturgucker.de/?bild=2084755459
BaWü	2022-09-02	7214-04-01	09:46:00	1		https://NABU-naturgucker.de/?bild=342100132
BaWü	2022-09-02	7214-04-01	06:30:00	1	male	https://NABU-naturgucker.de/?bild=701997957
BaWü	2022-09-02	7215-01-01		1		https://NABU-naturgucker.de/?bild=-1790749053
BaWü	2022-09-02	7216-01-01		1	female	https://NABU-naturgucker.de/?bild=-959534710
BaWü	2022-09-02	7218-02-01		1		https://NABU-naturgucker.de/?bild=782735199
BaWü	2022-09-02	7219-01-01		1		https://NABU-naturgucker.de/?bild=-833422828
BaWü	2022-09-02	7220-02-01		1	male	https://NABU-naturgucker.de/?bild=-1246791531
BaWü	2022-09-02	7220-02-01		1	female	https://NABU-naturgucker.de/?bild=1777598108
BaWü	2022-09-02	7221-01-01		1	male	https://NABU-naturgucker.de/?bild=-819607229
BaWü	2022-09-02	7221-01-01		1		https://NABU-naturgucker.de/?bild=-240844713
BaWü	2022-09-02	7221-01-01		1	female	https://NABU-naturgucker.de/?bild=243072851
BaWü	2022-09-02	7221-03-01		1	male	https://NABU-naturgucker.de/?bild=1348993005
BaWü	2022-09-02	7221-03-01		1	male	https://NABU-naturgucker.de/?bild=351082619
BaWü	2022-09-02	7221-03-01		1	female	https://NABU-naturgucker.de/?bild=970401191
BaWü	2022-09-02	7221-03-01		1	male	https://NABU-naturgucker.de/?bild=732553870
BaWü	2022-09-02	7221-03-01	10:15:00	1	female	https://NABU-naturgucker.de/?bild=-1361908229
BaWü	2022-09-02	7221-04-01		1	male	https://NABU-naturgucker.de/?bild=-670290442
BaWü	2022-09-02	7223-02-01		2		https://NABU-naturgucker.de/?bild=-1500857426
BaWü	2022-09-02	7314-02-01		1	female	https://NABU-naturgucker.de/?bild=-508931230
BaWü	2022-09-02	7314-03-01		1		https://NABU-naturgucker.de/?bild=-953788206
BaWü	2022-09-02	7314-04-01		1	female	https://NABU-naturgucker.de/?bild=-1062397094
BaWü	2022-09-02	7314-04-01		1		https://NABU-naturgucker.de/?bild=-1598403772
BaWü	2022-09-02	7315-01-01		1	male	https://NABU-naturgucker.de/?bild=-1365374866
BaWü	2022-09-02	7321-01-01		1	female	https://NABU-naturgucker.de/?bild=-1393752095
BaWü	2022-09-02	7321-03-01		1		https://NABU-naturgucker.de/?bild=1236059524
BaWü	2022-09-02	7413-03-01		1		https://NABU-naturgucker.de/?bild=134311133
BaWü	2022-09-02	7414-03-01		1	female	https://NABU-naturgucker.de/?bild=951528977
BaWü	2022-09-02	7419-01-01	13:46:00	3	female	https://NABU-naturgucker.de/?bild=-886266779
BaWü	2022-09-02	7420-03-01		1	male	https://NABU-naturgucker.de/?bild=-1901878849
BaWü	2022-09-02	7421-04-01		1		https://NABU-naturgucker.de/?bild=-1621911350
BaWü	2022-09-02	7513-02-01		2		https://NABU-naturgucker.de/?bild=-421901989
BaWü	2022-09-02	7513-02-01		1	female	https://NABU-naturgucker.de/?bild=1712077913
BaWü	2022-09-02	7513-03-01		2	female	https://NABU-naturgucker.de/?bild=549324095
BaWü	2022-09-02	7513-04-01	18:30:00	2		https://NABU-naturgucker.de/?bild=-1429611595
BaWü	2022-09-02	7514-03-01	23:07:00	1	male	https://NABU-naturgucker.de/?bild=1085615080
BaWü	2022-09-02	7519-02-01		1	female	https://NABU-naturgucker.de/?bild=-1815585986
BaWü	2022-09-02	7520-02-01		1	male	https://NABU-naturgucker.de/?bild=452605240
BaWü	2022-09-02	7521-02-01	15:30:00	1	female	https://NABU-naturgucker.de/?bild=307582954
BaWü	2022-09-02	7613-03-01		1		https://NABU-naturgucker.de/?bild=2069555301
BaWü	2022-09-02	7613-03-01		1	female	https://NABU-naturgucker.de/?bild=412176047
BaWü	2022-09-02	7613-03-01		1	male	https://NABU-naturgucker.de/?bild=-2112167936
BaWü	2022-09-02	7712-01-01		1		https://NABU-naturgucker.de/?bild=1779249823
BaWü	2022-09-02	7712-02-01		1		https://NABU-naturgucker.de/?bild=1191745090
BaWü	2022-09-02	7712-02-01		1		https://NABU-naturgucker.de/?bild=-256807780
BaWü	2022-09-02	7712-04-01		1	male	https://NABU-naturgucker.de/?bild=-1930671106
BaWü	2022-09-02	7712-04-01		1		https://NABU-naturgucker.de/?bild=-1251028102
BaWü	2022-09-02	7812-02-01		1	female	https://NABU-naturgucker.de/?bild=-1246639477
BaWü	2022-09-02	7812-02-01		1	female	https://NABU-naturgucker.de/?bild=363876070
BaWü	2022-09-02	7812-03-01		1	female	https://NABU-naturgucker.de/?bild=-1325128411
BaWü	2022-09-02	7812-04-01	19:56:00	1		https://NABU-naturgucker.de/?bild=-608002578
BaWü	2022-09-02	7813-03-01	20:45:00	1	female	https://NABU-naturgucker.de/?bild=-320691136
BaWü	2022-09-02	7813-03-01		1	female	https://NABU-naturgucker.de/?bild=1203342827
BaWü	2022-09-02	7813-03-01		1	female	https://NABU-naturgucker.de/?bild=-55089830
BaWü	2022-09-02	7813-03-01		1	male	https://NABU-naturgucker.de/?bild=-193959138
BaWü	2022-09-02	7813-03-01		1		https://NABU-naturgucker.de/?bild=1097022706
Bay	2022-09-02	7834-01-01		1	male	https://NABU-naturgucker.de/?bild=-917393790
BaWü	2022-09-02	7911-04-01		1	male	https://NABU-naturgucker.de/?bild=-608283539
BaWü	2022-09-02	7911-04-01		1	female	https://NABU-naturgucker.de/?bild=561146821
BaWü	2022-09-02	7911-04-01		1	male	https://NABU-naturgucker.de/?bild=669467944
BaWü	2022-09-02	7911-04-01		1	male	https://NABU-naturgucker.de/?bild=742918771
BaWü	2022-09-02	7911-04-01		1		https://NABU-naturgucker.de/?bild=842578065
BaWü	2022-09-02	7912-02-01		1	female	https://NABU-naturgucker.de/?bild=1318915966
BaWü	2022-09-02	7912-02-01		1	male	https://NABU-naturgucker.de/?bild=1538417805
BaWü	2022-09-02	7912-02-01		1	male	https://NABU-naturgucker.de/?bild=-12692005
BaWü	2022-09-02	7912-04-01		1	male	https://NABU-naturgucker.de/?bild=1882515383
BaWü	2022-09-02	7912-04-01		3	female	https://NABU-naturgucker.de/?bild=-986107616
BaWü	2022-09-02	7912-04-01		1	female	https://NABU-naturgucker.de/?bild=-168481170
BaWü	2022-09-02	7912-04-01		1	male	https://NABU-naturgucker.de/?bild=-1897462666
BaWü	2022-09-02	7912-04-01		1	male	https://NABU-naturgucker.de/?bild=-1096074635
BaWü	2022-09-02	7912-04-01		1		https://NABU-naturgucker.de/?bild=-142274364
BaWü	2022-09-02	7912-04-01		1	male	https://NABU-naturgucker.de/?bild=43534238
BaWü	2022-09-02	7913-01-01		1	female	https://NABU-naturgucker.de/?bild=-1938406424
BaWü	2022-09-02	7913-01-01		4		https://NABU-naturgucker.de/?bild=133603397
BaWü	2022-09-02	7913-01-01		1	female	https://NABU-naturgucker.de/?bild=667932319
BaWü	2022-09-02	7913-02-01		1		https://NABU-naturgucker.de/?bild=-1818206621
BaWü	2022-09-02	7913-03-01		1	female	https://NABU-naturgucker.de/?bild=-1526896307
BaWü	2022-09-02	7913-03-01		1	female	https://NABU-naturgucker.de/?bild=-916479898
BaWü	2022-09-02	7913-03-01		1	female	https://NABU-naturgucker.de/?bild=-1516445504
BaWü	2022-09-02	7913-03-01		4	female	https://NABU-naturgucker.de/?bild=-588630546
BaWü	2022-09-02	7913-03-01		1		https://NABU-naturgucker.de/?bild=1497614238
BaWü	2022-09-02	7913-03-01		1	female	https://NABU-naturgucker.de/?bild=2145929619
BaWü	2022-09-02	7913-03-01		1		https://NABU-naturgucker.de/?bild=-1924000584
BaWü	2022-09-02	7913-03-01		1	male	https://NABU-naturgucker.de/?bild=1341573945
BaWü	2022-09-02	7913-03-01	20:49:00	1	female	https://NABU-naturgucker.de/?bild=-580601478
BaWü	2022-09-02	7913-03-01		1	female	https://NABU-naturgucker.de/?bild=-2119042244
BaWü	2022-09-02	7924-02-01		1	female	https://NABU-naturgucker.de/?bild=-1289437058
BaWü	2022-09-02	8011-04-01		1	female	https://NABU-naturgucker.de/?bild=344768239
BaWü	2022-09-02	8011-04-01		1	female	https://NABU-naturgucker.de/?bild=-1363237425
BaWü	2022-09-02	8012-01-01		1		https://NABU-naturgucker.de/?bild=1319435089
BaWü	2022-09-02	8012-01-01		1		https://NABU-naturgucker.de/?bild=1915840407
BaWü	2022-09-02	8012-02-01		1		https://NABU-naturgucker.de/?bild=-596438919
BaWü	2022-09-02	8012-02-01		1	female	https://NABU-naturgucker.de/?bild=-1518948075
BaWü	2022-09-02	8012-02-01		2	male	https://NABU-naturgucker.de/?bild=869099362
BaWü	2022-09-02	8012-02-01		1	female	https://NABU-naturgucker.de/?bild=-1029934400
BaWü	2022-09-02	8012-02-01		1	male	https://NABU-naturgucker.de/?bild=1092474540
BaWü	2022-09-02	8012-02-01		4	male	https://NABU-naturgucker.de/?bild=-1394041534
BaWü	2022-09-02	8012-02-01		1	female	https://NABU-naturgucker.de/?bild=-994430498
BaWü	2022-09-02	8012-02-01		1	female	https://NABU-naturgucker.de/?bild=-1034673428
BaWü	2022-09-02	8012-03-01		3	male	https://NABU-naturgucker.de/?bild=-938291918
BaWü	2022-09-02	8012-03-01		1	male	https://NABU-naturgucker.de/?bild=-392467855
BaWü	2022-09-02	8012-03-01		1		https://NABU-naturgucker.de/?bild=2030411611
BaWü	2022-09-02	8012-04-01		1	female	https://NABU-naturgucker.de/?bild=-321129282
BaWü	2022-09-02	8012-04-01		1	male	https://NABU-naturgucker.de/?bild=-1046284499
BaWü	2022-09-02	8013-01-01		9	female	https://NABU-naturgucker.de/?bild=-1705353139
BaWü	2022-09-02	8013-01-01		1	male	https://NABU-naturgucker.de/?bild=1316561625
BaWü	2022-09-02	8013-01-01		1	male	https://NABU-naturgucker.de/?bild=9315737
BaWü	2022-09-02	8013-01-01		1	female	https://NABU-naturgucker.de/?bild=1292010320
BaWü	2022-09-02	8013-01-01		1	male	https://NABU-naturgucker.de/?bild=568106427
BaWü	2022-09-02	8013-02-01		1	female	https://NABU-naturgucker.de/?bild=94022443
BaWü	2022-09-02	8013-02-01		1	female	https://NABU-naturgucker.de/?bild=-103254941
BaWü	2022-09-02	8111-02-01		1		https://NABU-naturgucker.de/?bild=743900356
BaWü	2022-09-02	8111-04-01		1	female	https://NABU-naturgucker.de/?bild=-950754127
BaWü	2022-09-02	8112-01-01		1		https://NABU-naturgucker.de/?bild=694539181
BaWü	2022-09-02	8112-01-01		2	male	https://NABU-naturgucker.de/?bild=-1744784288
BaWü	2022-09-02	8112-01-01		1		https://NABU-naturgucker.de/?bild=1690996967
BaWü	2022-09-02	8112-01-01	22:00:00	1	male	https://NABU-naturgucker.de/?bild=-879159052
BaWü	2022-09-02	8112-01-01		1	male	https://NABU-naturgucker.de/?bild=-1091956706
BaWü	2022-09-02	8112-01-01		2		https://NABU-naturgucker.de/?bild=-1866822677
BaWü	2022-09-02	8112-03-01		1	female	https://NABU-naturgucker.de/?bild=-1306086082
BaWü	2022-09-02	8113-02-01		2		https://NABU-naturgucker.de/?bild=387864346
BaWü	2022-09-02	8123-04-01		1	male	https://NABU-naturgucker.de/?bild=2110196936
BaWü	2022-09-02	8211-02-01		1	female	https://NABU-naturgucker.de/?bild=-187754488
BaWü	2022-09-02	8222-03-01		1	female	https://NABU-naturgucker.de/?bild=1317209265
BaWü	2022-09-02	8222-03-01	22:00:00	1	female	https://NABU-naturgucker.de/?bild=579830956
BaWü	2022-09-02	8311-02-01	18:30:00	1		https://NABU-naturgucker.de/?bild=1405668605
BaWü	2022-09-02	8311-04-01		2	male	https://NABU-naturgucker.de/?bild=-1769085284
BaWü	2022-09-02	8311-04-01		4	male	https://NABU-naturgucker.de/?bild=-628588582
BaWü	2022-09-02	8311-04-01		2		https://NABU-naturgucker.de/?bild=-937334089
BaWü	2022-09-02	8312-03-01		1		https://NABU-naturgucker.de/?bild=-497619578
BaWü	2022-09-02	8312-03-01		1		https://NABU-naturgucker.de/?bild=164210181
BaWü	2022-09-02	8323-01-01		3	female	https://NABU-naturgucker.de/?bild=-1753071961
BaWü	2022-09-02	8323-01-01		1		https://NABU-naturgucker.de/?bild=-972314545
BaWü	2022-09-02	8323-02-01		1		https://NABU-naturgucker.de/?bild=-1133148425
BaWü	2022-09-02	8412-01-01		1		https://NABU-naturgucker.de/?bild=-1339306382
BaWü	2022-09-02	8413-02-01		3	female	https://NABU-naturgucker.de/?bild=1851059268
Hes	2022-09-03	5918-01-01		1	female	https://NABU-naturgucker.de/?bild=-38195067
BaWü	2022-09-03	6821-03-01		1	female	https://NABU-naturgucker.de/?bild=-673301507
BaWü	2022-09-03	8012-02-01		1	female	https://NABU-naturgucker.de/?bild=1062803260
BaWü	2022-09-03	6417-04-01		1	female	https://NABU-naturgucker.de/?bild=1906533116
Rh-Pf	2022-09-03	6014-01-01	22:20:00	1		https://NABU-naturgucker.de/?bild=797737479
BaWü	2022-09-03	7222-04-01		1		https://NABU-naturgucker.de/?bild=-1447386437
BaWü	2022-09-03	7513-02-01		4	female	https://NABU-naturgucker.de/?bild=-111971977
Rh-Pf	2022-09-03	5915-03-01			male	https://NABU-naturgucker.de/?bild=-1085310643
BaWü	2022-09-03	6617-01-01		1	female	https://NABU-naturgucker.de/?bild=-1363767938
NiHB	2022-09-03	3424-04-01		1	female	https://NABU-naturgucker.de/?bild=-69977349
NRW	2022-09-03	3717-03-01		2	female	https://NABU-naturgucker.de/?bild=-648975127
NRW	2022-09-03	3813-01-01		1		https://NABU-naturgucker.de/?bild=-1405935609
NRW	2022-09-03	3911-02-01	11:30:00	1		https://NABU-naturgucker.de/?bild=-1298956675
NRW	2022-09-03	4107-03-01		1	male	https://NABU-naturgucker.de/?bild=1669778524
NRW	2022-09-03	4115-04-01		1		https://NABU-naturgucker.de/?bild=168494646
NRW	2022-09-03	4207-02-01		2	female	https://NABU-naturgucker.de/?bild=-2046319238
NRW	2022-09-03	4311-04-01		1	female	https://NABU-naturgucker.de/?bild=-634656779
NRW	2022-09-03	4311-04-01	23:45:00	1	female	https://NABU-naturgucker.de/?bild=89658665
NRW	2022-09-03	4317-02-01		1	male	https://NABU-naturgucker.de/?bild=-393342940
NRW	2022-09-03	4503-02-01		1		https://NABU-naturgucker.de/?bild=-497488899
NRW	2022-09-03	4504-03-01		1		https://NABU-naturgucker.de/?bild=-1454882966
NRW	2022-09-03	4604-02-01		1	female	https://NABU-naturgucker.de/?bild=-944167293
NRW	2022-09-03	4605-02-01	21:40:00	1	male	https://NABU-naturgucker.de/?bild=-1304036448
NRW	2022-09-03	4605-03-01		1	female	https://NABU-naturgucker.de/?bild=-312296714
NRW	2022-09-03	4608-01-01		2	male	https://NABU-naturgucker.de/?bild=-724210896
NRW	2022-09-03	4704-01-01		1	male	https://NABU-naturgucker.de/?bild=-205432676
NRW	2022-09-03	4704-01-01		1	female	https://NABU-naturgucker.de/?bild=-1791102711
NRW	2022-09-03	4704-02-01		1	female	https://NABU-naturgucker.de/?bild=913501249
NRW	2022-09-03	4704-02-01		1	female	https://NABU-naturgucker.de/?bild=864060670
NRW	2022-09-03	4704-02-01	23:04:00	1	female	https://NABU-naturgucker.de/?bild=-2064566700
NRW	2022-09-03	4704-04-01		2	male	https://NABU-naturgucker.de/?bild=-1362761214
NRW	2022-09-03	4705-01-01		1	female	https://NABU-naturgucker.de/?bild=-1455793904
NRW	2022-09-03	4705-01-01		1		https://NABU-naturgucker.de/?bild=-370002401
NRW	2022-09-03	4705-03-01		1	male	https://NABU-naturgucker.de/?bild=-1937203396
NRW	2022-09-03	4706-03-01		1	male	https://NABU-naturgucker.de/?bild=-2008137952
NRW	2022-09-03	4706-03-01		1	male	https://NABU-naturgucker.de/?bild=-1434243215
NRW	2022-09-03	4706-04-01		1	female	https://NABU-naturgucker.de/?bild=269550865
NRW	2022-09-03	4706-04-01		1	female	https://NABU-naturgucker.de/?bild=-1715150720
NRW	2022-09-03	4706-04-01		1	female	https://NABU-naturgucker.de/?bild=-806413019
NRW	2022-09-03	4706-04-01	08:26:00	1	female	https://NABU-naturgucker.de/?bild=888606206
NRW	2022-09-03	4706-04-01		1	female	https://NABU-naturgucker.de/?bild=-323405626
NRW	2022-09-03	4804-01-01		1	female	https://NABU-naturgucker.de/?bild=732883641
NRW	2022-09-03	4804-02-01		1	female	https://NABU-naturgucker.de/?bild=976436776
NRW	2022-09-03	4804-02-01		1	male	https://NABU-naturgucker.de/?bild=-1016302203
NRW	2022-09-03	4804-02-01		1	male	https://NABU-naturgucker.de/?bild=-1677714276
NRW	2022-09-03	4805-02-01		1	male	https://NABU-naturgucker.de/?bild=637634633
NRW	2022-09-03	4806-01-01		3	male	https://NABU-naturgucker.de/?bild=-1282330689
NRW	2022-09-03	4806-01-01		1	female	https://NABU-naturgucker.de/?bild=1652809492
NRW	2022-09-03	4807-03-01	09:00:00	1	male	https://NABU-naturgucker.de/?bild=387714759
NRW	2022-09-03	4807-04-01		1	female	https://NABU-naturgucker.de/?bild=1543105444
NRW	2022-09-03	4807-04-01		1		https://NABU-naturgucker.de/?bild=-969027916
NRW	2022-09-03	4905-02-01		1		https://NABU-naturgucker.de/?bild=2038730120
NRW	2022-09-03	4905-02-01		1		https://NABU-naturgucker.de/?bild=-1503848319
NRW	2022-09-03	4908-03-01	12:00:00	1	male	https://NABU-naturgucker.de/?bild=-570615553
NRW	2022-09-03	5006-04-01		1		https://NABU-naturgucker.de/?bild=-833733862
NRW	2022-09-03	5007-02-01		2	male	https://NABU-naturgucker.de/?bild=-1796008979
NRW	2022-09-03	5007-03-01		1	female	https://NABU-naturgucker.de/?bild=-1516136518
NRW	2022-09-03	5007-04-01		1	male	https://NABU-naturgucker.de/?bild=-2046344564
NRW	2022-09-03	5007-04-01		1		https://NABU-naturgucker.de/?bild=1347580880
NRW	2022-09-03	5008-01-01		1	male	https://NABU-naturgucker.de/?bild=-1310223726
NRW	2022-09-03	5103-01-01		1		https://NABU-naturgucker.de/?bild=487115143
NRW	2022-09-03	5107-01-01		1	female	https://NABU-naturgucker.de/?bild=739301056
NRW	2022-09-03	5107-04-01		1		https://NABU-naturgucker.de/?bild=-282950102
NRW	2022-09-03	5109-04-01		1	female	https://NABU-naturgucker.de/?bild=-862180651
Thür	2022-09-03	5127-02-01	17:13:00	1	male	https://NABU-naturgucker.de/?bild=1373697165
NRW	2022-09-03	5208-03-01		1		https://NABU-naturgucker.de/?bild=-1751167800
NRW	2022-09-03	5209-04-01		4		https://NABU-naturgucker.de/?bild=-2052707665
NRW	2022-09-03	5209-04-01		1	female	https://NABU-naturgucker.de/?bild=947844575
NRW	2022-09-03	5209-04-01		1		https://NABU-naturgucker.de/?bild=537427165
NRW	2022-09-03	5308-03-01		1		https://NABU-naturgucker.de/?bild=1293180456
NRW	2022-09-03	5309-01-01		1	male	https://NABU-naturgucker.de/?bild=-1820162874
NRW	2022-09-03	5309-01-01	21:30:00	2		https://NABU-naturgucker.de/?bild=-1181846635
Rh-Pf	2022-09-03	5408-04-01		1	male	https://NABU-naturgucker.de/?bild=1058864682
Rh-Pf	2022-09-03	5611-01-01		1		https://NABU-naturgucker.de/?bild=1158419241
Hes	2022-09-03	5721-02-01		2		https://NABU-naturgucker.de/?bild=-1659297878
Hes	2022-09-03	5816-04-01		1	male	https://NABU-naturgucker.de/?bild=-544451802
Hes	2022-09-03	5817-03-01		1	female	https://NABU-naturgucker.de/?bild=2075472498
Hes	2022-09-03	5817-03-01		1	female	https://NABU-naturgucker.de/?bild=-1441886553
Hes	2022-09-03	5817-03-01	00:10:00	1	female	https://NABU-naturgucker.de/?bild=-1592276696
Hes	2022-09-03	5817-04-01	23:05:00	1		https://NABU-naturgucker.de/?bild=-1334358852
Hes	2022-09-03	5818-04-01		1		https://NABU-naturgucker.de/?bild=729616592
Hes	2022-09-03	5914-04-01		1	female	https://NABU-naturgucker.de/?bild=-1506098114
Hes	2022-09-03	5915-01-01		1		https://NABU-naturgucker.de/?bild=1948869452
Hes	2022-09-03	5915-02-01		1	female	https://NABU-naturgucker.de/?bild=-69292475
Rh-Pf	2022-09-03	5915-03-01		1	male	https://NABU-naturgucker.de/?bild=-1057279576
Rh-Pf	2022-09-03	5915-03-01		1	female	https://NABU-naturgucker.de/?bild=-1038151768
Rh-Pf	2022-09-03	5915-03-01		1	female	https://NABU-naturgucker.de/?bild=-1357270354
Hes	2022-09-03	5916-02-01		1	female	https://NABU-naturgucker.de/?bild=276845128
Hes	2022-09-03	5916-03-01		1		https://NABU-naturgucker.de/?bild=415442800
Hes	2022-09-03	5916-03-01		1	male	https://NABU-naturgucker.de/?bild=1318749840
Hes	2022-09-03	5916-04-01		1	male	https://NABU-naturgucker.de/?bild=360479253
Hes	2022-09-03	5917-01-01		1	male	https://NABU-naturgucker.de/?bild=1870091122
Hes	2022-09-03	5918-01-01		1		https://NABU-naturgucker.de/?bild=-356118985
Hes	2022-09-03	5919-01-01		1	male	https://NABU-naturgucker.de/?bild=-868259905
Rh-Pf	2022-09-03	6013-04-01	22:47:00	1	female	https://NABU-naturgucker.de/?bild=7382762
Rh-Pf	2022-09-03	6014-01-01	14:13:00	1		https://NABU-naturgucker.de/?bild=-454944720
Rh-Pf	2022-09-03	6014-01-01		1		https://NABU-naturgucker.de/?bild=785346991
Rh-Pf	2022-09-03	6014-01-01		1		https://NABU-naturgucker.de/?bild=87817148
Rh-Pf	2022-09-03	6015-01-01		1	male	https://NABU-naturgucker.de/?bild=508618298
Rh-Pf	2022-09-03	6015-01-01		3	female	https://NABU-naturgucker.de/?bild=-371419791
Rh-Pf	2022-09-03	6015-02-01	18:00:00		female	https://NABU-naturgucker.de/?bild=1248259620
Rh-Pf	2022-09-03	6015-02-01		1	male	https://NABU-naturgucker.de/?bild=176721087
Rh-Pf	2022-09-03	6015-02-01	23:45:00	1	female	https://NABU-naturgucker.de/?bild=-815192730
Rh-Pf	2022-09-03	6015-02-01	22:00:00	1		https://NABU-naturgucker.de/?bild=-1400476765
Hes	2022-09-03	6016-01-01		1		https://NABU-naturgucker.de/?bild=-736567678
Bay	2022-09-03	6020-02-01		1	female	https://NABU-naturgucker.de/?bild=-1427517140
Bay	2022-09-03	6021-01-01		1	male	https://NABU-naturgucker.de/?bild=421004508
Rh-Pf	2022-09-03	6114-02-01		2		https://NABU-naturgucker.de/?bild=-482779840
Rh-Pf	2022-09-03	6115-02-01		1	female	https://NABU-naturgucker.de/?bild=20353419
Hes	2022-09-03	6116-01-01		1		https://NABU-naturgucker.de/?bild=-305189618
Hes	2022-09-03	6116-04-01		1		https://NABU-naturgucker.de/?bild=-1066905372
Hes	2022-09-03	6117-01-01		1	female	https://NABU-naturgucker.de/?bild=-608336281
Hes	2022-09-03	6117-01-01		1	male	https://NABU-naturgucker.de/?bild=-71128384
Hes	2022-09-03	6118-03-01		1		https://NABU-naturgucker.de/?bild=118456612
Bay	2022-09-03	6126-04-01	09:20:00	1		https://NABU-naturgucker.de/?bild=-1346802051
Rh-Pf	2022-09-03	6215-01-01		1	male	https://NABU-naturgucker.de/?bild=1544710034
Rh-Pf	2022-09-03	6215-01-01		1		https://NABU-naturgucker.de/?bild=-1418798506
Rh-Pf	2022-09-03	6215-01-01		1	male	https://NABU-naturgucker.de/?bild=-837749860
Rh-Pf	2022-09-03	6315-04-01		1	female	https://NABU-naturgucker.de/?bild=361570259
Rh-Pf	2022-09-03	6315-04-01		1		https://NABU-naturgucker.de/?bild=-1279113798
Rh-Pf	2022-09-03	6315-04-01		1	female	https://NABU-naturgucker.de/?bild=626216672
Hes	2022-09-03	6316-01-01		1		https://NABU-naturgucker.de/?bild=-1604318768
Rh-Pf	2022-09-03	6316-03-01		2	male	https://NABU-naturgucker.de/?bild=-85591436
Hes	2022-09-03	6316-04-01	01:48:00	1		https://NABU-naturgucker.de/?bild=1000560745
Rh-Pf	2022-09-03	6415-04-01		4		https://NABU-naturgucker.de/?bild=355546465
Hes	2022-09-03	6416-02-01		1	female	https://NABU-naturgucker.de/?bild=109137592
Rh-Pf	2022-09-03	6416-03-01		1		https://NABU-naturgucker.de/?bild=-694668929
Rh-Pf	2022-09-03	6416-03-01		1	male	https://NABU-naturgucker.de/?bild=-685675582
BaWü	2022-09-03	6416-04-01		1	male	https://NABU-naturgucker.de/?bild=-1201597279
BaWü	2022-09-03	6417-02-01	12:00:00	1	female	https://NABU-naturgucker.de/?bild=211188869
BaWü	2022-09-03	6417-02-01		1	male	https://NABU-naturgucker.de/?bild=1897240449
Hes	2022-09-03	6417-03-01		2	male	https://NABU-naturgucker.de/?bild=-1627049578
Hes	2022-09-03	6417-03-01		1	female	https://NABU-naturgucker.de/?bild=313296087
Hes	2022-09-03	6418-01-01		1	female	https://NABU-naturgucker.de/?bild=-1105099556
Rh-Pf	2022-09-03	6515-01-01		1	male	https://NABU-naturgucker.de/?bild=-1846479795
Rh-Pf	2022-09-03	6515-03-01		1	female	https://NABU-naturgucker.de/?bild=1042402918
Rh-Pf	2022-09-03	6515-04-01	13:15:00	1	female	https://NABU-naturgucker.de/?bild=1037222467
Rh-Pf	2022-09-03	6516-01-01		1	male	https://NABU-naturgucker.de/?bild=-2134706838
Rh-Pf	2022-09-03	6516-01-01		1		https://NABU-naturgucker.de/?bild=570245841
Rh-Pf	2022-09-03	6516-01-01		1	male	https://NABU-naturgucker.de/?bild=-1206500958
Rh-Pf	2022-09-03	6516-01-01		1	female	https://NABU-naturgucker.de/?bild=-1667966153
BaWü	2022-09-03	6516-02-01		1	male	https://NABU-naturgucker.de/?bild=-445461895
BaWü	2022-09-03	6516-02-01	23:55:00	1		https://NABU-naturgucker.de/?bild=-2060286807
Rh-Pf	2022-09-03	6516-04-01		1	female	https://NABU-naturgucker.de/?bild=-293653349
BaWü	2022-09-03	6517-01-01		1	male	https://NABU-naturgucker.de/?bild=-1333881004
BaWü	2022-09-03	6517-01-01		1		https://NABU-naturgucker.de/?bild=-84358988
BaWü	2022-09-03	6517-01-01		1	female	https://NABU-naturgucker.de/?bild=319926216
BaWü	2022-09-03	6517-02-01	21:40:00	1	female	https://NABU-naturgucker.de/?bild=-2113221014
BaWü	2022-09-03	6517-02-01		1		https://NABU-naturgucker.de/?bild=904258726
BaWü	2022-09-03	6517-03-01		1	male	https://NABU-naturgucker.de/?bild=-44146801
BaWü	2022-09-03	6517-04-01		1		https://NABU-naturgucker.de/?bild=-712770798
BaWü	2022-09-03	6517-04-01		1		https://NABU-naturgucker.de/?bild=969725407
BaWü	2022-09-03	6518-03-01		17	female	https://NABU-naturgucker.de/?bild=957408962
BaWü	2022-09-03	6518-03-01		1		https://NABU-naturgucker.de/?bild=888034442
BaWü	2022-09-03	6518-03-01	15:00:00	1		https://NABU-naturgucker.de/?bild=287214123
BaWü	2022-09-03	6519-02-01		1	male	https://NABU-naturgucker.de/?bild=587509246
Rh-Pf	2022-09-03	6615-02-01		1		https://NABU-naturgucker.de/?bild=-1248651758
Rh-Pf	2022-09-03	6615-02-01	07:43:00	1		https://NABU-naturgucker.de/?bild=452346120
Rh-Pf	2022-09-03	6615-02-01		1		https://NABU-naturgucker.de/?bild=-262509677
Rh-Pf	2022-09-03	6615-02-01		1	male	https://NABU-naturgucker.de/?bild=1517872368
BaWü	2022-09-03	6617-01-01		1	male	https://NABU-naturgucker.de/?bild=-1401510821
BaWü	2022-09-03	6617-01-01	22:55:00	1	male	https://NABU-naturgucker.de/?bild=-366698175
BaWü	2022-09-03	6617-03-01	09:00:00	1		https://NABU-naturgucker.de/?bild=-182746653
BaWü	2022-09-03	6617-04-01		2	female	https://NABU-naturgucker.de/?bild=1491131123
BaWü	2022-09-03	6617-04-01		2	female	https://NABU-naturgucker.de/?bild=-1104723168
BaWü	2022-09-03	6618-02-01		1	female	https://NABU-naturgucker.de/?bild=-2037679912
BaWü	2022-09-03	6618-04-01		2		https://NABU-naturgucker.de/?bild=1664262695
Rh-Pf	2022-09-03	6714-02-01		1		https://NABU-naturgucker.de/?bild=766747293
BaWü	2022-09-03	6716-02-01		1	male	https://NABU-naturgucker.de/?bild=-1425733057
BaWü	2022-09-03	6717-01-01		1		https://NABU-naturgucker.de/?bild=-1872274022
BaWü	2022-09-03	6717-02-01		1		https://NABU-naturgucker.de/?bild=-337361489
BaWü	2022-09-03	6717-04-01		1	male	https://NABU-naturgucker.de/?bild=-400621244
BaWü	2022-09-03	6717-04-01		1	male	https://NABU-naturgucker.de/?bild=-1476839814
BaWü	2022-09-03	6718-01-01		1	female	https://NABU-naturgucker.de/?bild=1638407442
BaWü	2022-09-03	6718-01-01		2	female	https://NABU-naturgucker.de/?bild=-303631845
BaWü	2022-09-03	6718-03-01		1		https://NABU-naturgucker.de/?bild=1762265659
Rh-Pf	2022-09-03	6814-01-01		1		https://NABU-naturgucker.de/?bild=1831591668
Rh-Pf	2022-09-03	6815-04-01		1		https://NABU-naturgucker.de/?bild=128134062
BaWü	2022-09-03	6816-02-01		2	male	https://NABU-naturgucker.de/?bild=-494892809
BaWü	2022-09-03	6816-04-01		1	female	https://NABU-naturgucker.de/?bild=-411021991
BaWü	2022-09-03	6817-01-01		1	male	https://NABU-naturgucker.de/?bild=2024369837
BaWü	2022-09-03	6817-01-01		1		https://NABU-naturgucker.de/?bild=-174393158
BaWü	2022-09-03	6817-02-01		1	female	https://NABU-naturgucker.de/?bild=148700304
BaWü	2022-09-03	6818-01-01		4	male	https://NABU-naturgucker.de/?bild=-777746143
BaWü	2022-09-03	6820-02-01		1	male	https://NABU-naturgucker.de/?bild=-661290651
BaWü	2022-09-03	6820-03-01	16:20:00	1		https://NABU-naturgucker.de/?bild=1536396496
BaWü	2022-09-03	6820-04-01		1	female	https://NABU-naturgucker.de/?bild=71390276
BaWü	2022-09-03	6821-01-01		1	female	https://NABU-naturgucker.de/?bild=-128244001
BaWü	2022-09-03	6821-01-01		1		https://NABU-naturgucker.de/?bild=-1627836676
BaWü	2022-09-03	6821-02-01		2	male	https://NABU-naturgucker.de/?bild=1433221212
BaWü	2022-09-03	6821-03-01		1	male	https://NABU-naturgucker.de/?bild=-1637313133
BaWü	2022-09-03	6821-04-01		3		https://NABU-naturgucker.de/?bild=-30838987
BaWü	2022-09-03	6824-03-01		1		https://NABU-naturgucker.de/?bild=-1969282280
Rh-Pf	2022-09-03	6915-03-01		1	male	https://NABU-naturgucker.de/?bild=-1555027169
Rh-Pf	2022-09-03	6915-04-01		1		https://NABU-naturgucker.de/?bild=695367132
BaWü	2022-09-03	6916-01-01		1		https://NABU-naturgucker.de/?bild=2012002761
BaWü	2022-09-03	6916-03-01	22:00:00	3	female	https://NABU-naturgucker.de/?bild=235076323
BaWü	2022-09-03	6916-03-01		1	male	https://NABU-naturgucker.de/?bild=-823347654
BaWü	2022-09-03	6916-03-01	14:30:00	1		https://NABU-naturgucker.de/?bild=1291671658
BaWü	2022-09-03	6916-03-01	23:50:00	1	female	https://NABU-naturgucker.de/?bild=126594659
BaWü	2022-09-03	6916-04-01		1	male	https://NABU-naturgucker.de/?bild=-1678659480
BaWü	2022-09-03	6917-01-01		1	female	https://NABU-naturgucker.de/?bild=-7056391
BaWü	2022-09-03	6917-01-01	15:00:00	1		https://NABU-naturgucker.de/?bild=1251618655
BaWü	2022-09-03	6917-03-01		4	male	https://NABU-naturgucker.de/?bild=-580697219
BaWü	2022-09-03	6920-01-01		1	female	https://NABU-naturgucker.de/?bild=1398155332
BaWü	2022-09-03	6920-01-01		1	female	https://NABU-naturgucker.de/?bild=-1588505871
BaWü	2022-09-03	6920-03-01		1		https://NABU-naturgucker.de/?bild=585485069
BaWü	2022-09-03	7015-02-01		1	male	https://NABU-naturgucker.de/?bild=-901078704
BaWü	2022-09-03	7015-02-01		1		https://NABU-naturgucker.de/?bild=-920284655
BaWü	2022-09-03	7015-04-01	08:20:00	1	female	https://NABU-naturgucker.de/?bild=-1872742900
BaWü	2022-09-03	7016-01-01		2		https://NABU-naturgucker.de/?bild=1369792484
BaWü	2022-09-03	7016-01-01	10:28:00	1		https://NABU-naturgucker.de/?bild=-223726477
BaWü	2022-09-03	7016-01-01		1	male	https://NABU-naturgucker.de/?bild=254149221
BaWü	2022-09-03	7016-01-01		1	female	https://NABU-naturgucker.de/?bild=1936128518
BaWü	2022-09-03	7016-02-01		1		https://NABU-naturgucker.de/?bild=-2105198793
BaWü	2022-09-03	7016-02-01	20:29:00	1		https://NABU-naturgucker.de/?bild=-809956397
BaWü	2022-09-03	7016-02-01		2	female	https://NABU-naturgucker.de/?bild=917881119
BaWü	2022-09-03	7016-03-01		1		https://NABU-naturgucker.de/?bild=301825200
BaWü	2022-09-03	7016-03-01		1	male	https://NABU-naturgucker.de/?bild=-253153163
BaWü	2022-09-03	7016-03-01	11:07:00	1	female	https://NABU-naturgucker.de/?bild=-813546188
BaWü	2022-09-03	7016-04-01		1		https://NABU-naturgucker.de/?bild=2024024604
BaWü	2022-09-03	7016-04-01		1		https://NABU-naturgucker.de/?bild=-546874914
BaWü	2022-09-03	7016-04-01		1		https://NABU-naturgucker.de/?bild=-1506595929
BaWü	2022-09-03	7017-03-01		1	female	https://NABU-naturgucker.de/?bild=-791803781
BaWü	2022-09-03	7017-03-01		3	male	https://NABU-naturgucker.de/?bild=-1216680665
BaWü	2022-09-03	7019-04-01		1	female	https://NABU-naturgucker.de/?bild=285943536
BaWü	2022-09-03	7020-03-01	21:28:00			https://NABU-naturgucker.de/?bild=-238566070
BaWü	2022-09-03	7021-03-01		1	male	https://NABU-naturgucker.de/?bild=-1602036128
BaWü	2022-09-03	7021-03-01		1	female	https://NABU-naturgucker.de/?bild=-1822833773
BaWü	2022-09-03	7021-03-01		1	male	https://NABU-naturgucker.de/?bild=-1241608195
BaWü	2022-09-03	7021-04-01		1		https://NABU-naturgucker.de/?bild=763846122
BaWü	2022-09-03	7022-03-01		1		https://NABU-naturgucker.de/?bild=939103992
BaWü	2022-09-03	7114-02-01		1	male	https://NABU-naturgucker.de/?bild=-676318610
BaWü	2022-09-03	7114-04-01		1		https://NABU-naturgucker.de/?bild=2131283727
BaWü	2022-09-03	7115-01-01		1		https://NABU-naturgucker.de/?bild=1679742850
BaWü	2022-09-03	7115-01-01	19:00:00	1	female	https://NABU-naturgucker.de/?bild=-436937617
BaWü	2022-09-03	7115-04-01		1	male	https://NABU-naturgucker.de/?bild=-1198639594
BaWü	2022-09-03	7115-04-01		2		https://NABU-naturgucker.de/?bild=1396682840
BaWü	2022-09-03	7116-01-01		1	female	https://NABU-naturgucker.de/?bild=-953869521
BaWü	2022-09-03	7116-01-01		1		https://NABU-naturgucker.de/?bild=531878437
BaWü	2022-09-03	7116-03-01		1	male	https://NABU-naturgucker.de/?bild=-1918447898
BaWü	2022-09-03	7118-01-01		1	male	https://NABU-naturgucker.de/?bild=-831914544
BaWü	2022-09-03	7120-02-01	02:00:00	1	male	https://NABU-naturgucker.de/?bild=-1907346109
BaWü	2022-09-03	7120-03-01		1		https://NABU-naturgucker.de/?bild=195751645
BaWü	2022-09-03	7120-04-01		1		https://NABU-naturgucker.de/?bild=-1588411722
BaWü	2022-09-03	7121-01-01		1	male	https://NABU-naturgucker.de/?bild=1633374848
BaWü	2022-09-03	7121-01-01		1	female	https://NABU-naturgucker.de/?bild=-1644232056
BaWü	2022-09-03	7121-01-01		1	female	https://NABU-naturgucker.de/?bild=853760944
BaWü	2022-09-03	7121-01-01		1	male	https://NABU-naturgucker.de/?bild=1389723748
BaWü	2022-09-03	7121-02-01		2		https://NABU-naturgucker.de/?bild=-1477317010
BaWü	2022-09-03	7121-02-01		1	male	https://NABU-naturgucker.de/?bild=-761919365
BaWü	2022-09-03	7121-03-01		1	male	https://NABU-naturgucker.de/?bild=689220971
BaWü	2022-09-03	7121-03-01		1	female	https://NABU-naturgucker.de/?bild=1163794947
BaWü	2022-09-03	7121-03-01		1	female	https://NABU-naturgucker.de/?bild=-2025296687
BaWü	2022-09-03	7121-03-01		2	male	https://NABU-naturgucker.de/?bild=-1778236811
BaWü	2022-09-03	7121-03-01		1	female	https://NABU-naturgucker.de/?bild=8013082
BaWü	2022-09-03	7121-04-01		1	male	https://NABU-naturgucker.de/?bild=1129104559
BaWü	2022-09-03	7121-04-01		1	male	https://NABU-naturgucker.de/?bild=-1185018918
BaWü	2022-09-03	7121-04-01	20:45:00	1	male	https://NABU-naturgucker.de/?bild=1030788593
BaWü	2022-09-03	7121-04-01		1		https://NABU-naturgucker.de/?bild=341683594
BaWü	2022-09-03	7121-04-01		2	female	https://NABU-naturgucker.de/?bild=-1969788413
BaWü	2022-09-03	7121-04-01	19:00:00	1	male	https://NABU-naturgucker.de/?bild=578736348
BaWü	2022-09-03	7121-04-01		2	female	https://NABU-naturgucker.de/?bild=-470119480
BaWü	2022-09-03	7122-03-01		1		https://NABU-naturgucker.de/?bild=744562626
BaWü	2022-09-03	7122-03-01		1		https://NABU-naturgucker.de/?bild=-1888887875
BaWü	2022-09-03	7122-03-01	18:02:00	1	male	https://NABU-naturgucker.de/?bild=1730177618
BaWü	2022-09-03	7122-04-01		1	male	https://NABU-naturgucker.de/?bild=2119326587
BaWü	2022-09-03	7122-04-01		1	female	https://NABU-naturgucker.de/?bild=592716368
BaWü	2022-09-03	7123-01-01		2	male	https://NABU-naturgucker.de/?bild=-1314635688
BaWü	2022-09-03	7215-01-01		1		https://NABU-naturgucker.de/?bild=664759749
BaWü	2022-09-03	7215-01-01		5		https://NABU-naturgucker.de/?bild=1891730431
BaWü	2022-09-03	7215-01-01		1	male	https://NABU-naturgucker.de/?bild=-588297700
BaWü	2022-09-03	7215-02-01		1	male	https://NABU-naturgucker.de/?bild=-2015662676
BaWü	2022-09-03	7215-03-01		3	male	https://NABU-naturgucker.de/?bild=254438609
BaWü	2022-09-03	7216-01-01		1		https://NABU-naturgucker.de/?bild=-1019448586
BaWü	2022-09-03	7216-01-01	19:30:00	1	female	https://NABU-naturgucker.de/?bild=-1506415769
BaWü	2022-09-03	7220-02-01		1	male	https://NABU-naturgucker.de/?bild=297419481
BaWü	2022-09-03	7220-02-01		1		https://NABU-naturgucker.de/?bild=308025696
BaWü	2022-09-03	7220-04-01		1		https://NABU-naturgucker.de/?bild=-1704454791
BaWü	2022-09-03	7221-01-01		1	female	https://NABU-naturgucker.de/?bild=-601980049
BaWü	2022-09-03	7221-01-01		1	male	https://NABU-naturgucker.de/?bild=2107279684
BaWü	2022-09-03	7221-02-01		1		https://NABU-naturgucker.de/?bild=-1134639371
BaWü	2022-09-03	7221-02-01		1		https://NABU-naturgucker.de/?bild=-1933344868
BaWü	2022-09-03	7221-03-01		1		https://NABU-naturgucker.de/?bild=1752121301
BaWü	2022-09-03	7222-03-01	06:05:00	1	male	https://NABU-naturgucker.de/?bild=1418012326
BaWü	2022-09-03	7223-01-01		2	male	https://NABU-naturgucker.de/?bild=-783505703
BaWü	2022-09-03	7223-04-01		1	female	https://NABU-naturgucker.de/?bild=1016446969
BaWü	2022-09-03	7313-02-01		1		https://NABU-naturgucker.de/?bild=528534679
BaWü	2022-09-03	7314-02-01		3	female	https://NABU-naturgucker.de/?bild=1992287394
BaWü	2022-09-03	7314-03-01		2	male	https://NABU-naturgucker.de/?bild=382642513
BaWü	2022-09-03	7314-03-01		1	female	https://NABU-naturgucker.de/?bild=-1417274422
BaWü	2022-09-03	7314-04-01		1	female	https://NABU-naturgucker.de/?bild=260691859
BaWü	2022-09-03	7320-01-01		1		https://NABU-naturgucker.de/?bild=-928686967
BaWü	2022-09-03	7320-02-01		2	male	https://NABU-naturgucker.de/?bild=-543931068
BaWü	2022-09-03	7324-02-01		1	male	https://NABU-naturgucker.de/?bild=-369040052
BaWü	2022-09-03	7413-04-01	01:33:00	1	female	https://NABU-naturgucker.de/?bild=-1103468414
BaWü	2022-09-03	7513-01-01		1	male	https://NABU-naturgucker.de/?bild=-389152476
BaWü	2022-09-03	7513-02-01		2	female	https://NABU-naturgucker.de/?bild=-922942404
BaWü	2022-09-03	7513-02-01		2	male	https://NABU-naturgucker.de/?bild=1644013483
BaWü	2022-09-03	7513-02-01		1	male	https://NABU-naturgucker.de/?bild=-69441373
BaWü	2022-09-03	7513-02-01		1		https://NABU-naturgucker.de/?bild=-1401731052
BaWü	2022-09-03	7513-04-01		1	female	https://NABU-naturgucker.de/?bild=1735496517
BaWü	2022-09-03	7514-03-01	13:35:00	1	female	https://NABU-naturgucker.de/?bild=295860814
BaWü	2022-09-03	7514-03-01	10:13:00	1	male	https://NABU-naturgucker.de/?bild=-164914030
BaWü	2022-09-03	7520-02-01		1		https://NABU-naturgucker.de/?bild=1597001078
BaWü	2022-09-03	7613-03-01		2		https://NABU-naturgucker.de/?bild=-1462665407
BaWü	2022-09-03	7613-03-01		1	male	https://NABU-naturgucker.de/?bild=740320523
BaWü	2022-09-03	7615-02-01		1	female	https://NABU-naturgucker.de/?bild=1083354315
Bay	2022-09-03	7631-01-01		1	male	https://NABU-naturgucker.de/?bild=-1137244671
BaWü	2022-09-03	7712-02-01		1	female	https://NABU-naturgucker.de/?bild=1796832541
BaWü	2022-09-03	7712-03-01	23:00:00	1	male	https://NABU-naturgucker.de/?bild=-1984240264
BaWü	2022-09-03	7713-01-01		2		https://NABU-naturgucker.de/?bild=1991552254
BaWü	2022-09-03	7714-02-01		3	male	https://NABU-naturgucker.de/?bild=-499406559
BaWü	2022-09-03	7715-02-01		2	male	https://NABU-naturgucker.de/?bild=884181075
BaWü	2022-09-03	7811-02-01		1	male	https://NABU-naturgucker.de/?bild=-1296864747
BaWü	2022-09-03	7812-02-01		1	male	https://NABU-naturgucker.de/?bild=-729913153
BaWü	2022-09-03	7812-03-01		2	female	https://NABU-naturgucker.de/?bild=-1337314194
BaWü	2022-09-03	7812-04-01		1		https://NABU-naturgucker.de/?bild=-2125951882
BaWü	2022-09-03	7812-04-01		1	female	https://NABU-naturgucker.de/?bild=1039866608
BaWü	2022-09-03	7813-03-01		1	male	https://NABU-naturgucker.de/?bild=-1642839629
BaWü	2022-09-03	7813-03-01		4		https://NABU-naturgucker.de/?bild=-987346947
BaWü	2022-09-03	7813-03-01		1	male	https://NABU-naturgucker.de/?bild=-1902883033
BaWü	2022-09-03	7813-03-01		1		https://NABU-naturgucker.de/?bild=688295229
BaWü	2022-09-03	7813-03-01		1	male	https://NABU-naturgucker.de/?bild=244681379
BaWü	2022-09-03	7813-03-01		2	male	https://NABU-naturgucker.de/?bild=684532491
BaWü	2022-09-03	7813-03-01		3		https://NABU-naturgucker.de/?bild=533578593
BaWü	2022-09-03	7814-03-01		1	female	https://NABU-naturgucker.de/?bild=-1692377717
BaWü	2022-09-03	7911-02-01		20	male	https://NABU-naturgucker.de/?bild=1911353757
BaWü	2022-09-03	7911-04-01		1	male	https://NABU-naturgucker.de/?bild=1444572525
BaWü	2022-09-03	7912-02-01	12:00:00	1		https://NABU-naturgucker.de/?bild=451905460
BaWü	2022-09-03	7912-02-01		1	male	https://NABU-naturgucker.de/?bild=-297967756
BaWü	2022-09-03	7912-02-01		1	male	https://NABU-naturgucker.de/?bild=1981221192
BaWü	2022-09-03	7912-03-01		1	male	https://NABU-naturgucker.de/?bild=-421648990
BaWü	2022-09-03	7912-04-01		1		https://NABU-naturgucker.de/?bild=2072487854
BaWü	2022-09-03	7912-04-01		5	female	https://NABU-naturgucker.de/?bild=-341818554
BaWü	2022-09-03	7912-04-01		1		https://NABU-naturgucker.de/?bild=389456421
BaWü	2022-09-03	7912-04-01		1	female	https://NABU-naturgucker.de/?bild=1659021571
BaWü	2022-09-03	7912-04-01		5	male	https://NABU-naturgucker.de/?bild=-368305927
BaWü	2022-09-03	7913-01-01	12:16:00	2	male	https://NABU-naturgucker.de/?bild=-39175881
BaWü	2022-09-03	7913-01-01		2	male	https://NABU-naturgucker.de/?bild=-573105108
BaWü	2022-09-03	7913-01-01		2	female	https://NABU-naturgucker.de/?bild=-194598027
BaWü	2022-09-03	7913-01-01		1		https://NABU-naturgucker.de/?bild=-574539805
BaWü	2022-09-03	7913-01-01	22:00:00	1	male	https://NABU-naturgucker.de/?bild=-814630291
BaWü	2022-09-03	7913-02-01		1	male	https://NABU-naturgucker.de/?bild=-1580295107
BaWü	2022-09-03	7913-03-01		1		https://NABU-naturgucker.de/?bild=-993368962
BaWü	2022-09-03	7913-03-01		1	female	https://NABU-naturgucker.de/?bild=-456705001
BaWü	2022-09-03	7913-03-01		1		https://NABU-naturgucker.de/?bild=556199572
BaWü	2022-09-03	7913-03-01		1		https://NABU-naturgucker.de/?bild=-1546057968
BaWü	2022-09-03	8012-01-01		1	female	https://NABU-naturgucker.de/?bild=47583856
BaWü	2022-09-03	8012-02-01		2	male	https://NABU-naturgucker.de/?bild=-863362840
BaWü	2022-09-03	8012-02-01		1	female	https://NABU-naturgucker.de/?bild=428441182
BaWü	2022-09-03	8012-02-01		1		https://NABU-naturgucker.de/?bild=1776248120
BaWü	2022-09-03	8012-02-01		1		https://NABU-naturgucker.de/?bild=1801395760
BaWü	2022-09-03	8012-02-01	21:30:00	1	male	https://NABU-naturgucker.de/?bild=-1760291447
BaWü	2022-09-03	8012-02-01		1	female	https://NABU-naturgucker.de/?bild=-1130145009
BaWü	2022-09-03	8012-02-01		1	female	https://NABU-naturgucker.de/?bild=-774422018
BaWü	2022-09-03	8012-02-01		1	female	https://NABU-naturgucker.de/?bild=1033738273
BaWü	2022-09-03	8012-02-01		2	male	https://NABU-naturgucker.de/?bild=-1290995076
BaWü	2022-09-03	8012-02-01		1	female	https://NABU-naturgucker.de/?bild=-1310760839
BaWü	2022-09-03	8012-02-01	00:45:00	1	male	https://NABU-naturgucker.de/?bild=925557090
BaWü	2022-09-03	8012-03-01		1	female	https://NABU-naturgucker.de/?bild=-75715227
BaWü	2022-09-03	8012-03-01	14:30:00	1	female	https://NABU-naturgucker.de/?bild=-334321535
BaWü	2022-09-03	8012-04-01		1	female	https://NABU-naturgucker.de/?bild=-1330828184
BaWü	2022-09-03	8013-01-01		1	male	https://NABU-naturgucker.de/?bild=-1057720852
BaWü	2022-09-03	8013-01-01		2	male	https://NABU-naturgucker.de/?bild=-2080885143
BaWü	2022-09-03	8013-01-01	12:50:00	1	male	https://NABU-naturgucker.de/?bild=-349220231
BaWü	2022-09-03	8013-01-01		1		https://NABU-naturgucker.de/?bild=331712998
BaWü	2022-09-03	8013-01-01		1	male	https://NABU-naturgucker.de/?bild=-1700562466
BaWü	2022-09-03	8013-01-01		1		https://NABU-naturgucker.de/?bild=-933546093
BaWü	2022-09-03	8013-01-01		1	male	https://NABU-naturgucker.de/?bild=-1951771105
BaWü	2022-09-03	8013-01-01		1		https://NABU-naturgucker.de/?bild=1690243081
BaWü	2022-09-03	8013-01-01		5	female	https://NABU-naturgucker.de/?bild=-1622776930
BaWü	2022-09-03	8013-02-01		1		https://NABU-naturgucker.de/?bild=2052161972
BaWü	2022-09-03	8013-03-01		1	female	https://NABU-naturgucker.de/?bild=-126784507
BaWü	2022-09-03	8111-04-01		2		https://NABU-naturgucker.de/?bild=-939891120
BaWü	2022-09-03	8111-04-01		1		https://NABU-naturgucker.de/?bild=-358730955
BaWü	2022-09-03	8112-01-01		1	female	https://NABU-naturgucker.de/?bild=-1769878058
BaWü	2022-09-03	8112-01-01	23:00:00	1	female	https://NABU-naturgucker.de/?bild=-368708304
BaWü	2022-09-03	8112-01-01		1		https://NABU-naturgucker.de/?bild=-2066934368
BaWü	2022-09-03	8112-01-01		2	male	https://NABU-naturgucker.de/?bild=542949769
BaWü	2022-09-03	8112-03-01		1		https://NABU-naturgucker.de/?bild=-1965082415
BaWü	2022-09-03	8211-02-01		1	male	https://NABU-naturgucker.de/?bild=-1863805776
BaWü	2022-09-03	8211-02-01		1	male	https://NABU-naturgucker.de/?bild=1089999071
BaWü	2022-09-03	8211-04-01		1	female	https://NABU-naturgucker.de/?bild=145340319
BaWü	2022-09-03	8221-01-01		1		https://NABU-naturgucker.de/?bild=-1795223350
BaWü	2022-09-03	8221-01-01	15:50:00	1		https://NABU-naturgucker.de/?bild=673977421
BaWü	2022-09-03	8311-02-01		1		https://NABU-naturgucker.de/?bild=765100650
BaWü	2022-09-03	8311-04-01		1	female	https://NABU-naturgucker.de/?bild=-1652822839
BaWü	2022-09-03	8311-04-01		1		https://NABU-naturgucker.de/?bild=-313688396
BaWü	2022-09-03	8312-04-01	21:24:00	1	female	https://NABU-naturgucker.de/?bild=1550555191
BaWü	2022-09-03	8312-04-01		1		https://NABU-naturgucker.de/?bild=596885592
BaWü	2022-09-03	8320-02-01		1	male	https://NABU-naturgucker.de/?bild=-1800911882
BaWü	2022-09-03	8321-01-01		1	male	https://NABU-naturgucker.de/?bild=-797378201
BaWü	2022-09-03	8322-02-01		1		https://NABU-naturgucker.de/?bild=1592123908
BaWü	2022-09-03	8412-01-01		1		https://NABU-naturgucker.de/?bild=-1956155306
BaWü	2022-09-03	8412-01-01		1		https://NABU-naturgucker.de/?bild=-529900330
BaWü	2022-09-03	8412-01-01		3	male	https://NABU-naturgucker.de/?bild=637851302
BaWü	2022-09-03	8412-02-01		1	male	https://NABU-naturgucker.de/?bild=-937019760
Bay	2022-09-03	8424-01-01		1		https://NABU-naturgucker.de/?bild=-1698790878
BaWü	2022-09-03	6821-04-01		1	female	https://NABU-naturgucker.de/?bild=-1568770607
BaWü	2022-09-03	8412-01-01		1		https://NABU-naturgucker.de/?bild=-1044263489
Rh-Pf	2022-09-04	6813-04-01	23:00:00	1	female	https://NABU-naturgucker.de/?bild=131334995
Rh-Pf	2022-09-04	6015-04-01		2	male	https://NABU-naturgucker.de/?bild=-703792969
Hes	2022-09-04	4722-03-01		1	male	https://NABU-naturgucker.de/?bild=-1288264540
NRW	2022-09-04	4706-04-01		1	male	https://NABU-naturgucker.de/?bild=367056188
Hes	2022-09-04	5817-04-01		1	female	https://NABU-naturgucker.de/?bild=-665423727
BaWü	2022-09-04	6820-02-01	21:04:00	1	female	https://NABU-naturgucker.de/?bild=1944054906
BaWü	2022-09-04	7121-01-01	08:20:00	1	male	https://NABU-naturgucker.de/?bild=2116495294
Hes	2022-09-04	6319-02-01	17:58:00	1	female	https://NABU-naturgucker.de/?bild=2103712739
Rh-Pf	2022-09-04	6517-03-01		1	female	https://NABU-naturgucker.de/?bild=523989609
NRW	2022-09-04	4605-04-01		3		https://NABU-naturgucker.de/?bild=-1808186416
BaWü	2022-09-04	6921-01-01	19:49:00	1	female	https://NABU-naturgucker.de/?bild=1726388645
NiHB	2022-09-04	2815-01-01		2	male	https://NABU-naturgucker.de/?bild=157906180
NiHB	2022-09-04	2815-03-01	09:50:00	5	male	https://NABU-naturgucker.de/?bild=97581527
NiHB	2022-09-04	3714-02-01	23:50:00	1	female	https://NABU-naturgucker.de/?bild=-30861821
NRW	2022-09-04	3811-01-01		1		https://NABU-naturgucker.de/?bild=-1910895995
NRW	2022-09-04	3907-03-01		1	female	https://NABU-naturgucker.de/?bild=728574983
NRW	2022-09-04	4405-02-01		2	female	https://NABU-naturgucker.de/?bild=52444172
NRW	2022-09-04	4407-03-01		2	female	https://NABU-naturgucker.de/?bild=-982803212
NiHB	2022-09-04	4425-02-01		3	male	https://NABU-naturgucker.de/?bild=512119069
NRW	2022-09-04	4503-04-01	21:33:00	1		https://NABU-naturgucker.de/?bild=-441490960
NRW	2022-09-04	4507-01-01		1	female	https://NABU-naturgucker.de/?bild=-2069968306
NRW	2022-09-04	4507-01-01		1	female	https://NABU-naturgucker.de/?bild=915577436
NRW	2022-09-04	4508-01-01		1		https://NABU-naturgucker.de/?bild=-1454381192
NRW	2022-09-04	4509-01-01		1	male	https://NABU-naturgucker.de/?bild=-1989558714
NRW	2022-09-04	4509-02-01		1	female	https://NABU-naturgucker.de/?bild=-2082184457
NRW	2022-09-04	4608-02-01		1		https://NABU-naturgucker.de/?bild=700242103
NRW	2022-09-04	4703-01-01		1	female	https://NABU-naturgucker.de/?bild=724229930
NRW	2022-09-04	4703-03-01		1	male	https://NABU-naturgucker.de/?bild=-860806309
NRW	2022-09-04	4704-02-01		1	male	https://NABU-naturgucker.de/?bild=-486947800
NRW	2022-09-04	4704-04-01		1		https://NABU-naturgucker.de/?bild=2136076731
NRW	2022-09-04	4705-01-01		1		https://NABU-naturgucker.de/?bild=632852872
NRW	2022-09-04	4705-03-01		1	female	https://NABU-naturgucker.de/?bild=-1547413654
NRW	2022-09-04	4705-04-01		1	female	https://NABU-naturgucker.de/?bild=380095246
NRW	2022-09-04	4707-03-01		2	male	https://NABU-naturgucker.de/?bild=1410946950
NRW	2022-09-04	4805-01-01		1		https://NABU-naturgucker.de/?bild=1827734864
NRW	2022-09-04	4806-01-01		1	male	https://NABU-naturgucker.de/?bild=-2097275974
NRW	2022-09-04	4807-04-01		1	male	https://NABU-naturgucker.de/?bild=-1801834335
Thür	2022-09-04	4828-03-01		1	female	https://NABU-naturgucker.de/?bild=1522679046
NRW	2022-09-04	4905-02-01		1		https://NABU-naturgucker.de/?bild=954437760
NRW	2022-09-04	4908-03-01		1	female	https://NABU-naturgucker.de/?bild=-268095751
NRW	2022-09-04	4908-03-01	22:35:00	1		https://NABU-naturgucker.de/?bild=-1318440051
NRW	2022-09-04	5006-02-01		1	female	https://NABU-naturgucker.de/?bild=-1970071717
NRW	2022-09-04	5006-04-01		1		https://NABU-naturgucker.de/?bild=-903280326
NRW	2022-09-04	5006-04-01		1		https://NABU-naturgucker.de/?bild=-957540246
NRW	2022-09-04	5006-04-01		1		https://NABU-naturgucker.de/?bild=-680743772
NRW	2022-09-04	5006-04-01		1		https://NABU-naturgucker.de/?bild=1545874349
NRW	2022-09-04	5006-04-01		1	male	https://NABU-naturgucker.de/?bild=-930376929
NRW	2022-09-04	5007-01-01		1		https://NABU-naturgucker.de/?bild=-1362299574
NRW	2022-09-04	5007-03-01		1	female	https://NABU-naturgucker.de/?bild=-207503729
NRW	2022-09-04	5007-04-01		1	male	https://NABU-naturgucker.de/?bild=1333933817
NRW	2022-09-04	5008-02-01	11:35:00	1		https://NABU-naturgucker.de/?bild=166575815
NRW	2022-09-04	5009-01-01		1		https://NABU-naturgucker.de/?bild=-764289030
Hes	2022-09-04	5021-02-01		1		https://NABU-naturgucker.de/?bild=585551791
NRW	2022-09-04	5107-01-01		1		https://NABU-naturgucker.de/?bild=1724277616
NRW	2022-09-04	5109-01-01		2		https://NABU-naturgucker.de/?bild=845566590
NRW	2022-09-04	5202-01-01		1	male	https://NABU-naturgucker.de/?bild=620859727
NRW	2022-09-04	5202-02-01		1		https://NABU-naturgucker.de/?bild=473813359
NRW	2022-09-04	5208-01-01		2		https://NABU-naturgucker.de/?bild=1275715837
NRW	2022-09-04	5209-01-01		1	male	https://NABU-naturgucker.de/?bild=321237125
NRW	2022-09-04	5209-01-01		2	male	https://NABU-naturgucker.de/?bild=-601472458
NRW	2022-09-04	5309-01-01		1	female	https://NABU-naturgucker.de/?bild=-79341108
Rh-Pf	2022-09-04	5611-04-01		1	female	https://NABU-naturgucker.de/?bild=318332521
Hes	2022-09-04	5615-01-01	21:30:00	1		https://NABU-naturgucker.de/?bild=-951929859
Hes	2022-09-04	5817-02-01		1	male	https://NABU-naturgucker.de/?bild=1558197940
Hes	2022-09-04	5817-04-01	22:15:00	1		https://NABU-naturgucker.de/?bild=-1910275378
Hes	2022-09-04	5817-04-01		1	female	https://NABU-naturgucker.de/?bild=-1253468283
Hes	2022-09-04	5818-03-01	16:49:00	1	male	https://NABU-naturgucker.de/?bild=-2028993312
Hes	2022-09-04	5818-03-01		1		https://NABU-naturgucker.de/?bild=1601097995
Hes	2022-09-04	5818-03-01		1	male	https://NABU-naturgucker.de/?bild=701503047
Hes	2022-09-04	5818-04-01		1		https://NABU-naturgucker.de/?bild=-25786093
Hes	2022-09-04	5819-03-01		1		https://NABU-naturgucker.de/?bild=1162849824
Hes	2022-09-04	5914-04-01		3	male	https://NABU-naturgucker.de/?bild=476512801
Hes	2022-09-04	5914-04-01		1		https://NABU-naturgucker.de/?bild=-561303499
Hes	2022-09-04	5915-01-01		1	male	https://NABU-naturgucker.de/?bild=188261361
Hes	2022-09-04	5915-01-01		1		https://NABU-naturgucker.de/?bild=-1064325155
Hes	2022-09-04	5915-01-01		1		https://NABU-naturgucker.de/?bild=1308012679
Hes	2022-09-04	5915-01-01	10:30:00	1		https://NABU-naturgucker.de/?bild=1412170965
Hes	2022-09-04	5915-01-01		1		https://NABU-naturgucker.de/?bild=-1523343061
Hes	2022-09-04	5915-01-01		1	male	https://NABU-naturgucker.de/?bild=-34107262
Rh-Pf	2022-09-04	5915-03-01		1	female	https://NABU-naturgucker.de/?bild=585610685
Rh-Pf	2022-09-04	5915-03-01		1		https://NABU-naturgucker.de/?bild=130438109
Rh-Pf	2022-09-04	5915-03-01		1	male	https://NABU-naturgucker.de/?bild=-1363187377
Rh-Pf	2022-09-04	5915-03-01		1	male	https://NABU-naturgucker.de/?bild=-1407116799
Rh-Pf	2022-09-04	5915-03-01	21:00:00	1	male	https://NABU-naturgucker.de/?bild=-187442655
Rh-Pf	2022-09-04	5915-03-01		1		https://NABU-naturgucker.de/?bild=-1873771258
Hes	2022-09-04	5915-04-01		1	male	https://NABU-naturgucker.de/?bild=-644629385
Hes	2022-09-04	5915-04-01		1	female	https://NABU-naturgucker.de/?bild=-1376553455
Hes	2022-09-04	5916-02-01		1		https://NABU-naturgucker.de/?bild=-1412691642
Hes	2022-09-04	5916-04-01		7		https://NABU-naturgucker.de/?bild=-532515312
Hes	2022-09-04	5917-02-01		3	male	https://NABU-naturgucker.de/?bild=-1153902422
Hes	2022-09-04	6013-02-01		1	male	https://NABU-naturgucker.de/?bild=-1788133207
Rh-Pf	2022-09-04	6013-03-01		1		https://NABU-naturgucker.de/?bild=-1920781088
Rh-Pf	2022-09-04	6013-04-01		1	male	https://NABU-naturgucker.de/?bild=-320220189
Rh-Pf	2022-09-04	6014-01-01		1	male	https://NABU-naturgucker.de/?bild=-1102618030
Rh-Pf	2022-09-04	6014-02-01		1	male	https://NABU-naturgucker.de/?bild=-658464882
Rh-Pf	2022-09-04	6015-01-01		1		https://NABU-naturgucker.de/?bild=40832654
Rh-Pf	2022-09-04	6015-01-01		1	female	https://NABU-naturgucker.de/?bild=-177084608
Rh-Pf	2022-09-04	6015-02-01		1	male	https://NABU-naturgucker.de/?bild=-2056935419
Rh-Pf	2022-09-04	6015-02-01	20:19:00	1		https://NABU-naturgucker.de/?bild=2140467854
Rh-Pf	2022-09-04	6015-02-01		3		https://NABU-naturgucker.de/?bild=180108968
Rh-Pf	2022-09-04	6015-02-01		3		https://NABU-naturgucker.de/?bild=-780282863
Rh-Pf	2022-09-04	6015-02-01		1	female	https://NABU-naturgucker.de/?bild=-1440809924
Rh-Pf	2022-09-04	6015-02-01		1	female	https://NABU-naturgucker.de/?bild=200721551
Rh-Pf	2022-09-04	6015-02-01		1		https://NABU-naturgucker.de/?bild=-614565051
Rh-Pf	2022-09-04	6015-02-01		1	male	https://NABU-naturgucker.de/?bild=-824668427
Rh-Pf	2022-09-04	6015-03-01		1		https://NABU-naturgucker.de/?bild=764245028
Hes	2022-09-04	6017-01-01		1	male	https://NABU-naturgucker.de/?bild=-597563762
[truncated: 13,998 more rows]
