# Supplementary material for: Updated distribution of Zoropsis spinimana (Dufour, 1820; Araneae: Zoropsidae) in Germany and novel insights into its ecology based on a citizen science survey
Source: Frontiers journal article supplement (doi:10.3389/frchs.2024.1383339), 2024-03-15
Supplement: Table_2.XLSX [file Table_2.XLSX]

## Sheet: Fig 5 C. reproduction
potential matings	cocoons		comments	juvenile/ subadult
https://NABU-naturgucker.de/?bild=1256690843	https://NABU-naturgucker.de/?bild=-1638882986	https://NABU-naturgucker.de/?bild=1526625781	captivitiy	https://NABU-naturgucker.de/?bild=537427165
https://NABU-naturgucker.de/?bild=599917561	https://NABU-naturgucker.de/?bild=-409524492		captivitiy	https://NABU-naturgucker.de/?bild=1369792484
https://NABU-naturgucker.de/?bild=1133382583	https://NABU-naturgucker.de/?bild=164933790			https://NABU-naturgucker.de/?bild=1089999071
https://NABU-naturgucker.de/?bild=582678861	https://NABU-naturgucker.de/?bild=1882548197			https://NABU-naturgucker.de/?bild=331712998
https://NABU-naturgucker.de/?bild=-1778236811	https://NABU-naturgucker.de/?bild=868623363			https://NABU-naturgucker.de/?bild=-937019760
https://NABU-naturgucker.de/?bild=8013082	https://NABU-naturgucker.de/?bild=-69977349		captivity	https://NABU-naturgucker.de/?bild=-982803212
https://NABU-naturgucker.de/?bild=1415193589	https://NABU-naturgucker.de/?bild=244060458			https://NABU-naturgucker.de/?bild=-1989558714
https://NABU-naturgucker.de/?bild=-428472351	https://NABU-naturgucker.de/?bild=-1027174861			https://NABU-naturgucker.de/?bild=954437760
https://NABU-naturgucker.de/?bild=-1584480089	https://NABU-naturgucker.de/?bild=942306636			https://NABU-naturgucker.de/?bild=1545874349
https://NABU-naturgucker.de/?bild=1856888287	https://NABU-naturgucker.de/?bild=-51924337		Switzerland	https://NABU-naturgucker.de/?bild=1333933817
https://NABU-naturgucker.de/?bild=-1828545269	https://NABU-naturgucker.de/?bild=942306636			https://NABU-naturgucker.de/?bild=1275715837
https://NABU-naturgucker.de/?bild=-756163112	https://NABU-naturgucker.de/?bild=-1571475826			https://NABU-naturgucker.de/?bild=-34107262
https://NABU-naturgucker.de/?bild=2122023553	https://NABU-naturgucker.de/?bild=2016070351			https://NABU-naturgucker.de/?bild=1080897024
https://NABU-naturgucker.de/?bild=-520301097	https://NABU-naturgucker.de/?bild=-1457777595			https://NABU-naturgucker.de/?bild=1178811428
https://NABU-naturgucker.de/?bild=2141965958	https://NABU-naturgucker.de/?bild=-1639747781			https://NABU-naturgucker.de/?bild=2076464799
https://NABU-naturgucker.de/?bild=1030152898	https://NABU-naturgucker.de/?bild=1562081594			https://NABU-naturgucker.de/?bild=-232450962
https://NABU-naturgucker.de/?bild=-87456428	https://NABU-naturgucker.de/?bild=1815897739			https://NABU-naturgucker.de/?bild=-1744412739
https://NABU-naturgucker.de/?bild=454781129	https://NABU-naturgucker.de/?bild=1003209088			https://NABU-naturgucker.de/?bild=-1902108881
https://NABU-naturgucker.de/?bild=415843380	https://NABU-naturgucker.de/?bild=-624741360			https://NABU-naturgucker.de/?bild=-1650259190
	https://NABU-naturgucker.de/?bild=-1461615361			https://NABU-naturgucker.de/?bild=1029951192
	https://NABU-naturgucker.de/?bild=-450954886			https://NABU-naturgucker.de/?bild=1236931669
	https://NABU-naturgucker.de/?bild=874489138			https://NABU-naturgucker.de/?bild=215127342
	https://NABU-naturgucker.de/?bild=140798967			https://NABU-naturgucker.de/?bild=706414191
	https://NABU-naturgucker.de/?bild=231229013			https://NABU-naturgucker.de/?bild=283527438
	https://NABU-naturgucker.de/?bild=1004442465			https://NABU-naturgucker.de/?bild=346553114
	https://NABU-naturgucker.de/?bild=-1838736001			https://NABU-naturgucker.de/?bild=1422658416
	https://NABU-naturgucker.de/?bild=-1826089231			https://NABU-naturgucker.de/?bild=457037155
	https://NABU-naturgucker.de/?bild=-102891648			https://NABU-naturgucker.de/?bild=-2110449403
	https://NABU-naturgucker.de/?bild=-1288934738			https://NABU-naturgucker.de/?bild=1127654880
	https://NABU-naturgucker.de/?bild=-1521942148			https://NABU-naturgucker.de/?bild=1532089427
	https://NABU-naturgucker.de/?bild=696604225			https://NABU-naturgucker.de/?bild=-1905393969
	https://NABU-naturgucker.de/?bild=-1926420407			https://NABU-naturgucker.de/?bild=-1886445121
	https://NABU-naturgucker.de/?bild=2140195340			https://NABU-naturgucker.de/?bild=-1727419913
	https://NABU-naturgucker.de/?bild=-1642782153			https://NABU-naturgucker.de/?bild=-727559077
	https://NABU-naturgucker.de/?bild=-1751953152			https://NABU-naturgucker.de/?bild=-1070804614
	https://NABU-naturgucker.de/?bild=1672744015			https://NABU-naturgucker.de/?bild=1456247884
	https://NABU-naturgucker.de/?bild=-1817035560			https://NABU-naturgucker.de/?bild=63351633
	https://NABU-naturgucker.de/?bild=410126734			https://NABU-naturgucker.de/?bild=-194199872
	https://NABU-naturgucker.de/?bild=680059416			https://NABU-naturgucker.de/?bild=1628919309
	https://NABU-naturgucker.de/?bild=-451912757			https://NABU-naturgucker.de/?bild=909216904
	https://NABU-naturgucker.de/?bild=-2097704503			https://NABU-naturgucker.de/?bild=-714263506
	https://NABU-naturgucker.de/?bild=951303075			https://NABU-naturgucker.de/?bild=1795375338
	https://NABU-naturgucker.de/?bild=-199355598			https://NABU-naturgucker.de/?bild=2137761431
	https://NABU-naturgucker.de/?bild=-132678881			https://NABU-naturgucker.de/?bild=-1206501885
	https://NABU-naturgucker.de/?bild=1214288967			https://NABU-naturgucker.de/?bild=1186606184
	https://NABU-naturgucker.de/?bild=-1994103032			https://NABU-naturgucker.de/?bild=-811299175
	https://NABU-naturgucker.de/?bild=-365380088			https://NABU-naturgucker.de/?bild=-895667022
	https://NABU-naturgucker.de/?bild=-709739628			https://NABU-naturgucker.de/?bild=1795764075
	https://NABU-naturgucker.de/?bild=-2093586718			https://NABU-naturgucker.de/?bild=-1220086012
	https://NABU-naturgucker.de/?bild=1215271094			https://NABU-naturgucker.de/?bild=1234900911
	https://NABU-naturgucker.de/?bild=-1165660246			https://NABU-naturgucker.de/?bild=-1883998451
	https://NABU-naturgucker.de/?bild=-808926294		captivitiy	https://NABU-naturgucker.de/?bild=-605050041
				https://NABU-naturgucker.de/?bild=-1193877213
				https://NABU-naturgucker.de/?bild=-2094506118
				https://NABU-naturgucker.de/?bild=281699867
				https://NABU-naturgucker.de/?bild=248601580
				https://NABU-naturgucker.de/?bild=-1359237092
				https://NABU-naturgucker.de/?bild=-1999064983
				https://NABU-naturgucker.de/?bild=-1785743972
				https://NABU-naturgucker.de/?bild=1588040922
				https://NABU-naturgucker.de/?bild=-284775535
				https://NABU-naturgucker.de/?bild=-552196057
				https://NABU-naturgucker.de/?bild=1209076407
				https://NABU-naturgucker.de/?bild=-492576863
				https://NABU-naturgucker.de/?bild=-1397551337
				https://NABU-naturgucker.de/?bild=579014778
				https://NABU-naturgucker.de/?bild=1882548197
				https://NABU-naturgucker.de/?bild=1213665082
				https://NABU-naturgucker.de/?bild=2127655649
				https://NABU-naturgucker.de/?bild=-391540305
				https://NABU-naturgucker.de/?bild=-372367666
				https://NABU-naturgucker.de/?bild=788707281
				https://NABU-naturgucker.de/?bild=1336288100
				https://NABU-naturgucker.de/?bild=526975134
				https://NABU-naturgucker.de/?bild=1485481326
				https://NABU-naturgucker.de/?bild=920831827
				https://NABU-naturgucker.de/?bild=-1762804951
				https://NABU-naturgucker.de/?bild=603712856
				https://NABU-naturgucker.de/?bild=-1392806330
				https://NABU-naturgucker.de/?bild=-1189882759
				https://NABU-naturgucker.de/?bild=1963745135
				https://NABU-naturgucker.de/?bild=-150273904
				https://NABU-naturgucker.de/?bild=-1349278897
				https://NABU-naturgucker.de/?bild=1472538438
				https://NABU-naturgucker.de/?bild=-803915244
				https://NABU-naturgucker.de/?bild=-665798267
				https://NABU-naturgucker.de/?bild=-1915491549
				https://NABU-naturgucker.de/?bild=-1154434114
				https://NABU-naturgucker.de/?bild=92502968
				https://NABU-naturgucker.de/?bild=-1510844846
				https://NABU-naturgucker.de/?bild=917481164
				https://NABU-naturgucker.de/?bild=45369732
				https://NABU-naturgucker.de/?bild=-1915491549
