# Supplementary material for: Updated distribution of Zoropsis spinimana (Dufour, 1820; Araneae: Zoropsidae) in Germany and novel insights into its ecology based on a citizen science survey
Source: Frontiers journal article supplement (doi:10.3389/frchs.2024.1383339), 2024-03-15
Supplement: Table_3.XLSX [file Table_3.XLSX]

## Sheet: Tabellenblatt1
TK25 grid cells	AraGes # Obs	NABU-naturgucker.de # Obs	Ratio (NABU/AraGes)
1425		1
1624		2
1626		5
1836		1
2324		1
2326		9
2327		3
2409		6
2425		9
2511		3
2516		1
2610		3
2710		4
2814		4
2815	1	12	12
2817		3
2818	3
2918		14
2919		6
3221		1
3320		2
3345	2
3346	2
3415		1
3424		1
3426		1
3445		9
3523	2
3524		8
3545		5
3546	1	23	23
3613	1
3615		2
3619	1
3623		3
3624		14
3625		3
3627		3
3646		2
3709		1
3712		1
3714		8
3717		1
3719		4
3727		2
3729		10
3809		1
3810		2
3811		5
3813		6
3817		2
3825		6
3828		1
3831	1
3835		9
3907		7
3909		2
3910		3
3911		5
3917		20
4007		6
4010	1	6	6
4011		29
4012	1
4016		6
4018	2
4019		3
4020		3
4038	1	2	2
4101		1
4105		16
4107	1	9	9
4109		2
4110	1
4111		2
4112		2
4115		3
4117		1
4122	3	3	1
4202	3	28	9.33
4203		3
4207		4
4209		8
4210		8
4212		2
4217		4
4218		10
4229		1
4232		2
4302		3
4303		2
4304		2
4305		12
4307		10
4308	1	14	14
4309		8
4310		7
4311	2	9	4.5
4312		9
4313		2
4317		7
4322		2
4326		2
4403	1	16	16
4404	1
4405		3
4406		21
4407		24
4408	3	19	6.33
4409		17
4410	1	21	21
4411		18
4412		6
4414		8
4417		1
4423		1
4424		1
4425	2	15	7.5
4431		1
4433		1
4437		1
4450	1
4503		9
4504		4
4505	1	21	21
4506	2	23	11.5
4507	1	30	3
4508		20
4509	2	30	15
4510	2	32	16
4511		18
4512		4
4513		4
4525		1
4526		1
4527		1
4531		2
4537	1	5	5
4603		5
4604	1	44	44
4605	5	55	11
4606	1	33	33
4607		9
4608	1	18	18
4610		4
4611		1
4612		2
4623		2
4626		2
4628		1
4630		2
4640	1	6	6
4703	1	29	29
4704		69
4705	7	110	15.71
4706	12	134	11.17
4707	5	25	5
4708		13
4709		16
4718		1
4719		1
4722		10
4730		1
4802		2
4803	1	13	13
4804	3	66	22
4805	5	56	11.2
4806	1	66	66
4807	4	85	21.25
4808		14
4809		5
4810		2
4815		1
4822	1	2	2
4826		2
4828		2
4902		6
4903		13
4904		3
4905	1	39	39
4906		6
4907	1	25	25
4908	1	35	35
4909		1
4911		3
4925		2
4926		2
4928		3
4929		1
4933		2
4936		2
5002		4
5004	2	7	3.5
5005		12
5006	2	66	33
5007	18	251	13.94
5008	5	29	5.8
5009		3
5021		1
5024		1
5033		1
5049		4
5102		8
5103		7
5104		9
5106	1	13	13
5107	2	48	24
5108	2	45	22.5
5109		17
5110		1
5127		2
5129		2
5202	1	18	18
5204		1
5205		4
5207		11
5208	1	114	114
5209	1	29	29
5211		1
5230		4
5306		3
5307	2
5308		16
5309		24
5314		2
5317		2
5318		3
5339		2
5404		1
5408		4
5409		5
5410		2
5414	1
5415		4
5417	1	6	6
5419	1
5510		6
5511		3
5512		2
5514		2
5515		2
5518		2
5519		1
5521		1
5523		1
5528		1
5530		1
5531		1
5609	1
5610		2
5611	29	13	0.45
5612		5
5613	1
5615		2
5617		6
5618		8
5630		1
5716		1
5717	7	27	3.86
5718		3
5719	1	6	6
5720		3
5721		2
5809		1
5811		2
5815	1	6	6
5816	5	34	6.8
5817	14	124	8.86
5818	31	183	5.93
5819	2	60	3
5820		7
5910		1
5912	1
5913		3
5914	5	56	11.2
5915	38	275	7.24
5916	18	122	6.78
5917	1	27	27
5918	2	65	32.5
5919		24
5920		3
5921		3
5924		2
5927	1	8	8
6007		2
6013	3	26	8.67
6014	3	50	16.67
6015	15	253	16.87
6016	10	79	7.9
6017	2	63	31.5
6018	2	39	19.5
6019		11
6020	1	19	19
6021	2	10	5
6024	2	5	2.5
6104		1
6113		8
6114	2	13	6.5
6115	1	22	22
6116		66
6117	24	194	8.83
6118	1	37	37
6119		5
6120		3
6121		2
6123		1
6125		6
6126		2
6127	1
6128		1
6205		7
6206		3
6210	1
6214		6
6215		18
6216	2	23	11.5
6217	8	64	8
6219		4
6220		2
6225	3	13	4.33
6232		1
6238		2
6305		1
6315	2	29	14.5
6316	6	65	1.83
6317	6	75	12.5
6318	1	15	15
6319		1
6324		3
6332	6
6413		1
6414	1	5	5
6415	5	41	8.2
6416	4	179	44.75
6417	27	222	8.22
6418	3	48	16
6433		1
6511		2
6512		5
6513		2
6514		3
6515	3	63	21
6516	31	316	1.19
6517	21	366	17.43
6518	25	228	9.12
6519	1	11	11
6524		5
6531	1	5	5
6532	6	24	4
6605		2
6606		5
6607		5
6608		3
6614	8	43	5.38
6615		55
6616	10	125	12.5
6617	18	273	15.17
6618	12	252	21
6619	1	16	16
6620		19
6624	1
6630		2
6707		16
6708	4	17	4.25
6713		2
6714	2	38	19
6715		11
6716	10	48	4.8
6717	7	159	22.71
6718	3	177	59
6719		37
6720	1	17	17
6721		21
6808		4
6813		8
6814	5	34	6.8
6815	1	33	33
6816	7	86	12.29
6817	8	100	12.5
6818	1	17	17
6819		5
6820	2	51	25.5
6821	8	178	22.25
6822		5
6823		4
6824		10
6842	1
6914		7
6915	8	69	8.63
6916	78	511	6.55
6917	10	121	12.1
6918	2	28	14
6919		4
6920	5	73	14.6
6921	2	48	24
6922		5
6935		1
6938	1
6939		3
7015	10	155	15.5
7016	46	344	7.48
7017	8	74	9.25
7018	1	27	27
7019	1	26	26
7020	4	122	3.5
7021	10	201	2.1
7022		31
7023		2
7114		26
7115	18	202	11.22
7116	4	42	1.5
7117	1	24	24
7118	7	53	7.57
7119		14
7120	6	125	2.83
7121	27	531	19.67
7122	7	139	19.86
7123		22
7126		6
7127		1
7137	1
7138		1
7141		1
7147		1
7214	4	48	12
7215	11	76	7
7216	15	23	1.53
7218	1	2	2
7219		24
7220	3	66	22
7221	10	153	15.3
7222	1	37	37
7223	1	17	17
7224		12
7230		1
7234	1	10	1
7235		1
7313	2	26	13
7314	6	104	17.33
7315	2	10	5
7316		2
7319	1
7320		17
7321	2	39	19.5
7322	4	71	17.75
7323	2	20	1
7324		15
7412	2
7413	1	50	5
7414	1	32	32
7418		4
7419		10
7420	3	36	12
7421	3	49	16.33
7422		6
7438		6
7512		19
7513	5	245	49
7514	2	31	15.5
7518		6
7519		27
7520		15
7521		24
7525		6
7531		1
7613	1	82	82
7614		32
7615		2
7617		5
7626		1
7631	6	17	2.83
7635	1
7645	1
7712		115
7713	1	9	9
7714	2	32	16
7715	1	13	13
7718		5
7726		4
7734		5
7736	1
7737		3
7811		17
7812	3	120	4
7813	2	134	67
7814		11
7818		1
7820		3
7834	2	19	9.5
7835	13	38	2.92
7838	1
7840	1
7911		52
7912	5	283	56.6
7913	14	425	3.36
7914		1
7924	1	4	4
7934	1	3	3
7935	2	3	1.5
7936	2
8011	1	27	27
8012	15	455	3.33
8013	3	263	87.67
8015		1
8030		1
8042		1
8111	1	116	116
8112		85
8113		3
8114		2
8115		2
8119		3
8120		5
8123		7
8133	1
8134		2
8137		1
8138		9
8141	1
8143	1	3	3
8211	3	68	22.67
8218		14
8219	1	42	42
8220		13
8221	1	21	21
8222		16
8223	2	13	6.5
8227		1
8228	1
8234		2
8238	1	1	1
8311	4	131	32.75
8312	3	73	24.33
8313		14
8314		6
8315	1	6	6
8316		3
8317		2
8320	1	15	15
8321	1	39	39
8322	1	10	1
8323	1	16	16
8411	3	1	0.33
8412	6	79	13.17
8413		21
8414		6
8416		2
8423		7
8424	3	12	4
			12.5	Median
Max-value	78	531	116
