# Supplementary material for: Updated distribution of Zoropsis spinimana (Dufour, 1820; Araneae: Zoropsidae) in Germany and novel insights into its ecology based on a citizen science survey
Source: Frontiers journal article supplement (doi:10.3389/frchs.2024.1383339), 2024-03-15
Supplement: Table_4.XLSX [file Table_4.XLSX]

## Sheet: Fig 7. prey and predation
	potential prey	class	order	comments			Numbers	Percent of total	Percent of class
https://NABU-naturgucker.de/?bild=-1277222365		Insecta	Diptera	captivity		Diptera	8	26.6667	42.1053
https://NABU-naturgucker.de/?bild=-1212406155		Insecta	Diptera	captivity		Araneae	9	30	81.8182
https://NABU-naturgucker.de/?bild=-1590493775		Arachnida	Araneae			Hetereoptera	2	6.66667	10.5263
https://NABU-naturgucker.de/?bild=-1868707538	Zoropsis spinimana	Arachnida	Araneae			Opilliones	2	6.66667	18.1818
https://NABU-naturgucker.de/?bild=-127446023		Insecta	Diptera			Dermaptera	1	3.33333	5.26316
https://NABU-naturgucker.de/?bild=1296266377	Callophoridae	Insecta	Diptera			Lepidoptera	6	20	31.5789
https://NABU-naturgucker.de/?bild=-1088672169	prey bigger than Z. spinimana	Arachnida	Araneae			Orthoptera	2	6.66667	10.5263
https://NABU-naturgucker.de/?bild=-1499399208		Arachnida	Araneae
https://NABU-naturgucker.de/?bild=-1658566531		Arachnida	Araneae			sum	30	100
https://NABU-naturgucker.de/?bild=1114601226		Arachnida	Araneae
https://NABU-naturgucker.de/?bild=-1355597596		Arachnida	Araneae
https://NABU-naturgucker.de/?bild=1982555629		Insecta	Hetereoptera
https://NABU-naturgucker.de/?bild=535061532		Insecta	Diptera			Arachnida	11	36.6667
https://NABU-naturgucker.de/?bild=-127446023		Insecta	Diptera			Insecta	19	63.3333
https://NABU-naturgucker.de/?bild=-107966090	Tipulidae	Insecta	Diptera
https://NABU-naturgucker.de/?bild=-72655635		Arachnida	Opilliones
https://NABU-naturgucker.de/?bild=-1414652608		Arachnida	Opilliones
https://NABU-naturgucker.de/?bild=-1942959609		Insecta	Dermaptera
https://NABU-naturgucker.de/?bild=-1395198593		Insecta	Hetereoptera
https://NABU-naturgucker.de/?bild=202650283		Insecta	Orthoptera
https://NABU-naturgucker.de/?bild=-1072617649	Triodia sylvina	Insecta	Lepidoptera
https://NABU-naturgucker.de/?bild=1833709196		Insecta	Lepidoptera
https://NABU-naturgucker.de/?bild=1862757331	Agrochola spec.	Insecta	Lepidoptera
https://NABU-naturgucker.de/?bild=515484547		Insecta	Lepidoptera
https://NABU-naturgucker.de/?bild=-1787220118		Insecta	Lepidoptera
https://NABU-naturgucker.de/?bild=1131491287		Insecta	Lepidoptera
https://NABU-naturgucker.de/?bild=-895948073		Arachnida	Araneae
https://NABU-naturgucker.de/?bild=-765512737		Insecta	Orthoptera
https://NABU-naturgucker.de/?bild=1541121552	Episyrphus balteatus	Insecta	Diptera
https://NABU-naturgucker.de/?bild=667646174	prey bigger than Z. spinimana	Arachnida	Araneae
