# Supplementary material for: Updated distribution of Zoropsis spinimana (Dufour, 1820; Araneae: Zoropsidae) in Germany and novel insights into its ecology based on a citizen science survey
Source: Frontiers journal article supplement (doi:10.3389/frchs.2024.1383339), 2024-03-15
Supplement: Table_5.XLSX [file Table_5.XLSX]

## Sheet: Fig 1. Color variation
A1	https://NABU-naturgucker.de/?bild=976436776
A2	https://NABU-naturgucker.de/?bild=-1113402779
A3	https://NABU-naturgucker.de/?bild=-1905838913
B1	https://NABU-naturgucker.de/?bild=559437365
B2	https://NABU-naturgucker.de/?bild=-1447386437
B3	https://NABU-naturgucker.de/?bild=-1180699850
C1	https://NABU-naturgucker.de/?bild=-507832973
C2	https://NABU-naturgucker.de/?bild=-2057185993
C3	https://NABU-naturgucker.de/?bild=927351380
D1	https://NABU-naturgucker.de/?bild=-1850112377
D2	https://NABU-naturgucker.de/?bild=-1261482632
D3	https://NABU-naturgucker.de/?bild=1207554975
D4	https://NABU-naturgucker.de/?bild=-353096132
D5	https://NABU-naturgucker.de/?bild=85762237

## Sheet: Fig 2. body size
https://NABU-naturgucker.de/?bild=-729913153
https://NABU-naturgucker.de/?bild=-1948996962
https://NABU-naturgucker.de/?bild=-149124195
https://NABU-naturgucker.de/?bild=104585264
https://NABU-naturgucker.de/?bild=-2135267131
https://NABU-naturgucker.de/?bild=989078005
https://NABU-naturgucker.de/?bild=-457717517
https://NABU-naturgucker.de/?bild=-459079836
https://NABU-naturgucker.de/?bild=-176737602
https://NABU-naturgucker.de/?bild=-1843093745
https://NABU-naturgucker.de/?bild=1842968794
https://NABU-naturgucker.de/?bild=-605170570
https://NABU-naturgucker.de/?bild=-9187360
https://NABU-naturgucker.de/?bild=751608303
https://NABU-naturgucker.de/?bild=-442712320
https://NABU-naturgucker.de/?bild=-543931068
https://NABU-naturgucker.de/?bild=-936591277
https://NABU-naturgucker.de/?bild=-741321303
https://NABU-naturgucker.de/?bild=178773638
https://NABU-naturgucker.de/?bild=-1617278387
https://NABU-naturgucker.de/?bild=-970050128
https://NABU-naturgucker.de/?bild=1693032890
https://NABU-naturgucker.de/?bild=29017922
https://NABU-naturgucker.de/?bild=426668526
https://NABU-naturgucker.de/?bild=176721087
https://NABU-naturgucker.de/?bild=-313823469
https://NABU-naturgucker.de/?bild=-2016366589
https://NABU-naturgucker.de/?bild=-877297661
https://NABU-naturgucker.de/?bild=-630690777
https://NABU-naturgucker.de/?bild=-1955689531
https://NABU-naturgucker.de/?bild=980015475
https://NABU-naturgucker.de/?bild=844237163
https://NABU-naturgucker.de/?bild=-147469916
https://NABU-naturgucker.de/?bild=-414394636
https://NABU-naturgucker.de/?bild=805584947
https://NABU-naturgucker.de/?bild=1605555531
https://NABU-naturgucker.de/?bild=1548146673
https://NABU-naturgucker.de/?bild=2011818245
https://NABU-naturgucker.de/?bild=-815192730
https://NABU-naturgucker.de/?bild=1708871026
https://NABU-naturgucker.de/?bild=-439148446
https://NABU-naturgucker.de/?bild=49341490
https://NABU-naturgucker.de/?bild=852042564
https://NABU-naturgucker.de/?bild=280774998
https://NABU-naturgucker.de/?bild=-215294993
https://NABU-naturgucker.de/?bild=488538189
https://NABU-naturgucker.de/?bild=-1374147381
https://NABU-naturgucker.de/?bild=1352661183
https://NABU-naturgucker.de/?bild=1723125165
https://NABU-naturgucker.de/?bild=-1230316915

## Sheet: Fig 3. TK25 grid cells
AraGes	NABU|naturgucker
2815	1425
2918	1624
3445	1626
3446	1836
3523	2324
3546	2326
3613	2327
3619	2409
3831	2425
4010	2426
4012	2511
4018	2516
4038	2610
4107	2710
4110	2814
4122	2815
4202	2817
4308	2918
4311	2919
4403	3221
4404	3320
4408	3415
4410	3424
4425	3426
4450	3445
4505	3524
4506	3545
4507	3546
4509	3615
4510	3623
4537	3624
4604	3625
4605	3627
4606	3646
4608	3709
4640	3712
4703	3714
4705	3717
4706	3719
4707	3727
4803	3729
4804	3809
4805	3810
4806	3811
4807	3813
4822	3817
4905	3825
4907	3828
4908	3835
5004	3907
5006	3909
5007	3910
5008	3911
5106	3917
5107	4007
5108	4010
5202	4011
5208	4016
5209	4019
5307	4020
5414	4038
5417	4101
5519	4105
5609	4107
5611	4109
5613	4111
5717	4112
5719	4115
5815	4117
5816	4122
5817	4202
5818	4203
5819	4207
5912	4209
5914	4210
5915	4212
5916	4217
5917	4218
5918	4229
5927	4232
6013	4302
6014	4303
6015	4304
6016	4305
6017	4307
6018	4308
6020	4309
6021	4310
6024	4311
6114	4312
6115	4313
6117	4317
6118	4322
6127	4326
6210	4403
6216	4405
6217	4406
6225	4407
6315	4408
6316	4409
6317	4410
6318	4411
6332	4412
6414	4414
6415	4417
6416	4423
6417	4424
6418	4425
6515	4431
6516	4433
6517	4437
6518	4503
6519	4504
6531	4505
6532	4506
6614	4507
6616	4508
6617	4509
6618	4510
6619	4511
6624	4512
6708	4513
6714	4525
6716	4526
6717	4527
6718	4531
6720	4537
6814	4603
6815	4604
6816	4605
6817	4606
6818	4607
6820	4608
6821	4610
6842	4611
6915	4612
6916	4623
6917	4626
6918	4628
6920	4630
6921	4640
6938	4703
7015	4704
7016	4705
7017	4706
7018	4707
7019	4708
7020	4709
7021	4718
7115	4719
7116	4722
7117	4730
7118	4802
7120	4803
7121	4804
7122	4805
7137	4806
7214	4807
7215	4808
7216	4809
7218	4810
7220	4815
7221	4822
7222	4826
7223	4828
7234	4902
7313	4903
7314	4904
7315	4905
7319	4906
7321	4907
7322	4908
7323	4909
7412	4911
7413	4925
7414	4926
7420	4928
7421	4929
7513	4933
7514	4936
7613	5002
7631	5004
7635	5005
7645	5006
7713	5007
7714	5008
7715	5009
7736	5021
7812	5024
7813	5033
7834	5049
7835	5102
7838	5103
7840	5104
7912	5106
7913	5107
7924	5108
7934	5109
7935	5110
7936	5127
8011	5129
8012	5202
8013	5204
8111	5205
8133	5207
8141	5208
8143	5209
8211	5221
8219	5230
8221	5306
8223	5308
8228	5309
8238	5314
8311	5317
8312	5318
8315	5339
8320	5404
8321	5408
8322	5409
8323	5410
8411	5415
8412	5417
8424	5510
	5511
	5512
	5514
	5515
	5518
	5519
	5521
	5523
	5528
	5530
	5531
	5610
	5611
	5612
	5615
	5617
	5618
	5630
	5716
	5717
	5718
	5719
	5720
	5721
	5809
	5811
	5815
	5816
	5817
	5818
	5819
	5820
	5910
	5913
	5914
	5915
	5916
	5917
	5918
	5919
	5920
	5921
	5924
	5927
	6007
	6013
	6014
	6015
	6016
	6017
	6018
	6019
	6020
	6021
	6024
	6104
	6113
	6114
	6115
	6116
	6117
	6118
	6119
	6120
	6121
	6123
	6125
	6126
	6128
	6205
	6206
	6214
	6215
	6216
	6217
	6219
	6220
	6225
	6232
	6238
	6305
	6315
	6316
	6317
	6318
	6319
	6324
	6413
	6414
	6415
	6416
	6417
	6418
	6433
	6511
	6512
	6513
	6514
	6515
	6516
	6517
	6518
	6519
	6524
	6531
	6532
	6605
	6606
	6607
	6608
	6614
	6615
	6616
	6617
	6618
	6619
	6620
	6630
	6707
	6708
	6713
	6714
	6715
	6716
	6717
	6718
	6719
	6720
	6721
	6808
	6813
	6814
	6815
	6816
	6817
	6818
	6819
	6820
	6821
	6822
	6823
	6824
	6914
	6915
	6916
	6917
	6918
	6919
	6920
	6921
	6922
	6935
	6939
	7015
	7016
	7017
	7018
	7019
	7020
	7021
	7022
	7023
	7114
	7115
	7116
	7117
	7118
	7119
	7120
	7121
	7122
	7123
	7124
	7126
	7127
	7138
	7141
	7147
	7214
	7215
	7216
	7218
	7219
	7220
	7221
	7222
	7223
	7224
	7230
	7234
	7235
	7313
	7314
	7315
	7316
	7319
	7320
	7321
	7322
	7323
	7324
	7413
	7414
	7418
	7419
	7420
	7421
	7422
	7438
	7512
	7513
	7514
	7518
	7519
	7520
	7521
	7525
	7531
	7612
	7613
	7614
	7615
	7617
	7626
	7631
	7712
	7713
	7714
	7715
	7718
	7726
	7734
	7737
	7811
	7812
	7813
	7814
	7818
	7820
	7834
	7835
	7911
	7912
	7913
	7914
	7924
	7934
	7935
	8011
	8012
	8013
	8015
	8030
	8042
	8111
	8112
	8113
	8114
	8115
	8119
	8120
	8123
	8134
	8137
	8138
	8143
	8211
	8218
	8219
	8220
	8221
	8222
	8223
	8227
	8234
	8238
	8311
	8312
	8313
	8314
	8315
	8316
	8317
	8320
	8321
	8322
	8323
	8411
	8412
	8413
	8414
	8416
	8423
	8424

## Sheet: Fig 6. special behaviour
dragline silk	onto/close to water
https://NABU-naturrgucker.de/?bild=-887474885	https://NABU-naturrgucker.de/?bild=-543277651
https://NABU-naturgucker.de/?bild=-1676587187	https://NABU-naturrgucker.de/?bild=329749451
	https://NABU-naturgucker.de/?bild=-1845641811
